# Supplementary material for: LINC01936 inhibits the proliferation and metastasis of lung squamous cell carcinoma probably by EMT signaling and immune infiltration
Source: PeerJ journal article supplement (doi:10.7717/peerj.16447), 2023-12-07
Supplement: S2.zip [file GSE88862_differentially expressed lncRNAs.xlsx]

## Sheet: Sheet1
geneNames		adjp	P	t	B	logFC	adj P<0.05;logFC=2
A1BG-AS1	lncRNA	0.686	0.5675	0.80785	-7.9368	0.259615
A2ML1-AS1	lncRNA	0.00254	0.000292	9.04	-0.08693	1.6028
A2ML1-AS2	lncRNA	0.592	0.34	1.06	-7.98158	0.127816
AADACL2-AS1	lncRNA	0.887	0.6795	-0.1275	-8.46234	-0.00592053
AATBC	lncRNA	0.415	0.316287	-1.662	-5.50427	-0.292552
AB015752	lncRNA	0.586	0.309	-1.13	-7.89983	-0.241801
ABCA9-AS1	lncRNA	0.000147	4.86e-06	21.1	4.7443	3.76069	up
ABCC5-AS1	lncRNA	0.751	0.515	0.701	-8.30479	0.15278
ABHD15-AS1	lncRNA	0.234	0.085	-2.15	-6.62749	-1.59516
AC000032	lncRNA	0.586	0.31	1.13	-7.90213	0.514709
AC000036	lncRNA	0.846	0.619	-0.53	-8.4223	-0.245965
AC000058	lncRNA	0.999	0.996	0.00494	-8.58645	0.000157
AC000061	lncRNA	0.951	0.761	0.321	-8.52509	0.020029
AC000067	lncRNA	1	0.999	0.00144	-8.58647	4.567e-05
AC000099	lncRNA	0.7755	0.5695	0.666	-8.25728	0.0881722
AC000123	lncRNA	0.505	0.242	-1.33	-7.68099	-0.496444
AC000124	lncRNA	0.75	0.514	0.703	-8.30373	0.032333
AC000372	lncRNA	0.986	0.902	0.13	-8.5763	0.0048754
AC002056	lncRNA	0.757	0.522	-0.688	-8.31495	-0.0405469
AC002064	lncRNA	0.501	0.239	-1.34	-7.66965	-0.26053
AC002064	lncRNA	0.178	0.0598	-2.43	-6.2499	-0.940337
AC002066	lncRNA	0.479589	0.396003	-9.811	-2.06758	-1.08559
AC002070	lncRNA	0.030433	0.00808589	-9.47667	-1.12513	-1.58708
AC002074	lncRNA	0.28955	0.243047	-3.02835	-5.35581	-0.626909
AC002074	lncRNA	0.0052	0.000747	-7.39	-1.19841	-0.44949
AC002076	lncRNA	0.000274	1.26e-05	17.4	3.63201	3.32916	up
AC002091	lncRNA	0.000671	4.67e-05	-13.3	2.08419	-2.95493	down
AC002091	lncRNA	6.32e-05	1.26e-06	-27.8	6.29778	-1.7329
AC002101	lncRNA	0.573	0.291	-1.18	-7.84635	-0.372988
AC002127	lncRNA	0.615	0.37	-0.987	-8.05244	-0.066644
AC002306	lncRNA	0.586	0.325	-1.09	-7.94377	-0.576476
AC002347	lncRNA	0.0613	0.0162	3.58	-4.78855	0.671733
AC002347	lncRNA	0.213	0.0749	2.25	-6.49231	1.13344
AC002351	lncRNA	0.906	0.7835	0.3032	-8.48747	0.0839512
AC002368	lncRNA	0.0346	0.008	-4.29	-3.97847	-0.970181
AC002375	lncRNA	0.108	0.0322	-2.95	-5.56509	-0.934589
AC002378	lncRNA	0.905	0.695	-0.416	-8.48419	-0.0227094
AC002383	lncRNA	0.581	0.299	1.16	-7.87213	0.182929
AC002386	lncRNA	0.599	0.351	-1.03	-8.00973	-0.351679
AC002401	lncRNA	0.86	0.638	-0.501	-8.4395	-0.0168548
AC002401	lncRNA	0.0153	0.00288	-5.47	-2.78903	-0.523388
AC002428	lncRNA	0.24835	0.117585	-5.725	-3.54814	-0.802123
AC002428	lncRNA	0.52	0.253	1.29	-7.7192	0.319796
AC002429	lncRNA	0.586	0.309	-1.13	-7.90065	-0.35033
AC002451	lncRNA	0.557007	0.415	-13.407	-2.77428	-0.469845
AC002454	lncRNA	0.079385	0.0253843	-3.695	-3.53815	-0.751997
AC002456	lncRNA	0.489667	0.244	0.63	-7.58566	0.107673
AC002460	lncRNA	0.848	0.7265	-0.40507	-8.40381	-0.0228157
AC002463	lncRNA	0.955	0.772	0.306	-8.5307	0.00952513
AC002464	lncRNA	0.000395	2.2e-05	-15.5	2.97384	-1.00492
AC002465	lncRNA	0.942	0.746	-0.342	-8.51692	-0.131021
AC002467	lncRNA	0.519233	0.366157	2.20333	-6.51222	0.418727
AC002472	lncRNA	0.586	0.309	-1.13	-7.89937	-0.646008
AC002480	lncRNA	0.221	0.0784	-2.21	-6.54086	-0.87477
AC002480	lncRNA	0.082	0.0231	-3.25	-5.19409	-0.596944
AC002511	lncRNA	0.748	0.512	-0.706	-8.30111	-0.0232769
AC002511	lncRNA	0.324	0.132	1.8	-7.08754	0.770601
AC002519	lncRNA	0.638	0.3945	-0.933	-8.10036	-0.202183
AC002519	lncRNA	0.405325	0.234064	-3.2555	-5.78485	-0.449708
AC002550	lncRNA	0.392	0.17	1.6	-7.3413	0.539681
AC002551	lncRNA	0.0836	0.0237	-3.23	-5.22007	-0.456124
AC002558	lncRNA	0.767	0.533	-0.671	-8.32787	-0.163644
AC002558	lncRNA	0.586	0.312	1.13	-7.90783	0.302642
AC003001	lncRNA	0.999	0.993	-0.00936	-8.58642	-0.0018794
AC003009	lncRNA	0.999	0.996	0.00514	-8.58645	0.00016093
AC003035	lncRNA	0.0402	0.0096	-4.1	-4.18933	-0.608055
AC003035	lncRNA	0.993	0.936	0.0843	-8.58221	0.00292723
AC003084	lncRNA	0.587	0.33	1.08	-7.956	0.19342
AC003087	lncRNA	0.994	0.941	-0.0781	-8.58281	-0.00249207
AC003092	lncRNA	0.7785	0.547	0.145	-8.33025	0.0476523
AC003092	lncRNA	0.96	0.796	0.273	-8.5419	0.00851273
AC003102	lncRNA	0.0692	0.0188	-3.44	-4.95914	-0.195616
AC003659	lncRNA	0.000798	5.98e-05	12.6	1.79145	3.8173	up
AC003666	lncRNA	0.997	0.978	0.0285	-8.58598	0.0008924
AC003684	lncRNA	0.218	0.0773	2.22	-6.52609	0.548746
AC003685	lncRNA	0.999	0.995	-0.00658	-8.58644	-0.0002549
AC003687	lncRNA	0.648	0.406	-0.908	-8.12845	-0.0307015
AC003958	lncRNA	0.14713	0.0568795	4.645	-4.0721	0.900437
AC003965	lncRNA	0.601	0.354	-1.02	-8.0172	-0.145398
AC003965	lncRNA	0.43	0.193	1.51	-7.46335	0.607057
AC003973	lncRNA	0.0753	0.0208	-3.34	-5.07604	-0.52193
AC003975	lncRNA	0.585	0.304	-1.15	-7.88736	-0.36664
AC003982	lncRNA	0.999	0.993	0.00967	-8.58641	0.00030823
AC003984	lncRNA	0.8145	0.5985	-0.583	-8.35699	-0.0970848
AC003985	lncRNA	0.978	0.857	-0.19	-8.56493	-0.0075173
AC003985	lncRNA	0.459	0.211	-1.44	-7.55081	-0.79991
AC003986	lncRNA	0.613	0.368	-0.99	-8.04966	-0.17267
AC003986	lncRNA	0.858	0.634	-0.506	-8.43629	-0.124345
AC003986	lncRNA	0.587	0.331	1.08	-7.96001	0.188663
AC003988	lncRNA	0.597	0.348	-1.04	-8.00272	-0.0432967
AC003991	lncRNA	0.7845	0.566	0.317	-8.29691	-0.00996177
AC003991	lncRNA	0.961	0.799	0.269	-8.54333	0.00843263
AC004000	lncRNA	0.0401	0.00954	4.1	-4.18274	0.844249
AC004009	lncRNA	1.79e-06	1.73e-09	106	12.6746	3.9067	up
AC004012	lncRNA	0.397	0.173	-1.59	-7.35887	-0.225598
AC004023	lncRNA	0.888	0.674	-0.447	-8.46902	-0.301928
AC004034	lncRNA	0.000701	4.98e-05	13.1	2.00758	2.97182	up
AC004039	lncRNA	0.596	0.347	-1.04	-8.00062	-0.353565
AC004052	lncRNA	0.4285	0.2015	0.39	-7.37297	-0.101501
AC004053	lncRNA	0.586	0.305	-1.14	-7.88897	-0.863478
AC004054	lncRNA	0.628	0.384	0.954	-8.08417	0.0924488
AC004063	lncRNA	0.997	0.98	-0.0258	-8.58607	-0.00088137
AC004066	lncRNA	0.779	0.546	0.648	-8.34402	0.157226
AC004069	lncRNA	0.745	0.509	0.712	-8.29682	0.336693
AC004112	lncRNA	0.626	0.5363	-1.0453	-7.66873	-0.298912
AC004147	lncRNA	0.984	0.891	-0.145	-8.57391	-0.00462523
AC004147	lncRNA	0.823	0.595	-0.568	-8.39841	-0.133023
AC004147	lncRNA	0.731	0.494	-0.738	-8.27576	-0.234046
AC004147	lncRNA	0.928	0.727	0.37	-8.50554	0.163146
AC004147	lncRNA	0.853	0.628	-0.516	-8.43076	-0.251867
AC004148	lncRNA	0.376	0.161	-1.65	-7.28599	-0.516865
AC004148	lncRNA	0.779	0.545	0.649	-8.34374	0.231988
AC004158	lncRNA	0.669	0.418	0.2055	-8.11834	0.0944707
AC004160	lncRNA	0.738833	0.548	-0.06265	-8.19683	-0.0866478
AC004160	lncRNA	0.641	0.398	-0.925	-8.1127	-0.0536695
AC004217	lncRNA	0.182	0.0615	-2.41	-6.28088	-0.487451
AC004231	lncRNA	0.0963	0.0281	3.07	-5.41432	0.451966
AC004231	lncRNA	0.782	0.548	-0.644	-8.34724	-0.0968816
AC004232	lncRNA	0.497	0.236	-1.35	-7.658	-0.377284
AC004241	lncRNA	0.349103	0.335647	-5.86218	-3.59263	-0.77181
AC004241	lncRNA	0.126	0.039	-2.79	-5.7808	-0.346954
AC004253	lncRNA	0.0344	0.00792	4.3	-3.96722	0.861067
AC004253	lncRNA	0.0625	0.0166	3.56	-4.81643	0.242058
AC004381	lncRNA	0.987	0.905	-0.126	-8.57695	-0.0040544
AC004415	lncRNA	0.58	0.298	-1.16	-7.86904	-0.376256
AC004448	lncRNA	0.244	0.0903	-2.1	-6.69116	-0.199287
AC004448	lncRNA	0.667667	0.420333	0.177667	-8.0057	0.0630821
AC004448	lncRNA	0.196	0.0675	2.33	-6.38016	0.380844
AC004449	lncRNA	0.324	0.132	-1.8	-7.08577	-0.411259
AC004470	lncRNA	0.253	0.0945	-2.06	-6.73978	-0.679006
AC004471	lncRNA	0.962	0.804	0.262	-8.54562	0.00813553
AC004477	lncRNA	0.6995	0.515	-0.6535	-8.00418	-0.0607113
AC004477	lncRNA	0.00246	0.000279	-9.13	-0.03387	-0.941915
AC004485	lncRNA	0.253	0.0943	2.07	-6.73691	0.143588
AC004490	lncRNA	0.119	0.0365	-2.84	-5.7069	-0.709593
AC004494	lncRNA	0.443	0.201	-1.48	-7.50261	-0.450017
AC004494	lncRNA	0.559	0.28	-1.21	-7.81192	-0.379839
AC004522	lncRNA	0.959	0.785	0.287	-8.53721	0.00923793
AC004540	lncRNA	0.59513	0.432376	-2.76167	-6.34441	-0.451786
AC004540	lncRNA	3.9e-05	5.52e-07	-32.9	7.23747	-2.87486	down
AC004543	lncRNA	0.996	0.953	0.062	-8.58416	0.00213637
AC004551	lncRNA	0.19	0.0648	-2.37	-6.336	-0.315818
AC004584	lncRNA	0.978	0.857	0.189	-8.56503	0.0062875
AC004584	lncRNA	0.201	0.0693	2.31	-6.40903	0.861911
AC004585	lncRNA	0.7295	0.49	-0.7825	-8.19886	-0.0299028
AC004590	lncRNA	0.803	0.572	0.605	-8.37435	0.229458
AC004594	lncRNA	0.01797	0.003705	5.575	-2.74966	1.31018
AC004672	lncRNA	0.707	0.468	0.785	-8.23733	0.218564
AC004690	lncRNA	0.793333	0.623	0.2583	-8.24844	0.0825726
AC004692	lncRNA	0.561489	0.420009	-5.04	-4.70631	-0.591417
AC004702	lncRNA	0.979	0.865	0.179	-8.56729	0.0616892
AC004704	lncRNA	0.754	0.519	-0.694	-8.31065	-0.218452
AC004706	lncRNA	0.0818	0.0231	3.25	-5.19098	0.612449
AC004707	lncRNA	0.036	0.00837	4.24	-4.03181	0.229477
AC004771	lncRNA	0.166	0.0546	2.51	-6.1502	0.234679
AC004771	lncRNA	0.00905	0.0015	-6.34	-2.02281	-0.497735
AC004771	lncRNA	0.816	0.586	-0.583	-8.38909	-0.448584
AC004771	lncRNA	0.942	0.745	0.343	-8.51641	0.120342
AC004771	lncRNA	0.587	0.329	-1.08	-7.95589	-0.223027
AC004801	lncRNA	0.779	0.546	-0.648	-8.34439	-0.0674517
AC004801	lncRNA	0.57	0.288	-1.19	-7.83822	-0.258203
AC004801	lncRNA	0.8755	0.6585	-0.4715	-8.45345	-0.0886317
AC004816	lncRNA	0.02607	0.00665029	14.415	1.30659	1.14173
AC004817	lncRNA	0.999	0.993	-0.00861	-8.58642	-0.001735
AC004817	lncRNA	0.0505	0.0128	3.81	-4.51649	0.867609
AC004828	lncRNA	0.998	0.99	-0.0131	-8.58637	-0.00041787
AC004830	lncRNA	0.582	0.3	1.16	-7.87385	0.192622
AC004835	lncRNA	0.667	0.426	0.867	-8.16581	0.282253
AC004837	lncRNA	0.951	0.762	0.32	-8.52567	0.0101729
AC004837	lncRNA	0.66	0.417	-0.885	-8.14976	-0.434376
AC004846	lncRNA	0.996	0.965	-0.0461	-8.58519	-0.0171073
AC004846	lncRNA	0.000245	1.06e-05	-18	3.82776	-1.51784
AC004847	lncRNA	0.105	0.0312	-2.98	-5.53235	-0.142588
AC004852	lncRNA	0.5545	0.4579	-1.4675	-7.18583	-0.82872
AC004862	lncRNA	0.749	0.513	-0.705	-8.30226	-0.0712919
AC004869	lncRNA	0.962	0.808	0.257	-8.54705	0.0080104
AC004869	lncRNA	0.587	0.331	-1.08	-7.95882	-0.402729
AC004870	lncRNA	0.2815	0.1095	0.13	-6.8784	0.0198783
AC004870	lncRNA	0.7055	0.4665	0.076	-8.23014	0.0496784
AC004870	lncRNA	0.987	0.914	-0.11365	-8.57517	-0.0135107
AC004872	lncRNA	0.801	0.569	-0.61	-8.37099	-0.0321867
AC004875	lncRNA	0.698	0.459	0.803	-8.22264	0.368583
AC004882	lncRNA	0.455	0.209	-1.44	-7.54028	-0.560284
AC004882	lncRNA	0.28515	0.1406	-2.3	-5.14004	-0.187902
AC004884	lncRNA	0.148	0.0475	-2.62	-5.9987	-0.828679
AC004888	lncRNA	0.00365	0.000473	8.16	-0.65749	1.06291
AC004889	lncRNA	0.169472	0.0700379	-6.88	-2.81703	-0.942155
AC004895	lncRNA	0.751	0.516	0.538333	-8.21947	0.133265
AC004906	lncRNA	0.959	0.785	0.288	-8.53705	0.0094656
AC004917	lncRNA	0.644025	0.4827	-1.06	-7.53803	-0.147
AC004918	lncRNA	0.00608	0.000906	-7.09	-1.42705	-0.588481
AC004920	lncRNA	0.822	0.592	0.572	-8.39626	0.520335
AC004923	lncRNA	0.234	0.0854	-2.15	-6.63188	-0.327691
AC004923	lncRNA	0.000849	6.54e-05	12.4	1.68624	1.36633
AC004930	lncRNA	0.586	0.316	1.11	-7.92087	0.425032
AC004936	lncRNA	0.628	0.384	0.954	-8.08402	0.809066
AC004941	lncRNA	0.673	0.4325	0.8565	-8.17397	0.41204
AC004943	lncRNA	0.825	0.596	-0.567	-8.39961	-0.133607
AC004943	lncRNA	0.583837	0.450533	2.20967	-6.32915	0.233268
AC004944	lncRNA	0.585	0.304	-1.15	-7.88672	-0.258268
AC004946	lncRNA	0.996	0.964	-0.0469	-8.58515	-0.00151873
AC004947	lncRNA	0.520688	0.391	-9.66633	-3.40824	-1.06325
AC004951	lncRNA	0.0297	0.0066	4.49	-3.75665	1.36945
AC004951	lncRNA	0.874	0.6755	-0.18	-8.4486	0.0327318
AC004967	lncRNA	0.0197	0.00396	5.08	-3.16074	0.49487
AC004969	lncRNA	0.453	0.208	1.45	-7.53444	0.641428
AC004973	lncRNA	0.207	0.0722	-2.28	-6.45386	-0.590571
AC004975	lncRNA	0.586	0.315	-1.12	-7.91786	-0.0420311
AC004982	lncRNA	0.00649	0.000984	-6.96	-1.52408	-1.70683
AC004982	lncRNA	0.303553	0.189036	-5.5952	-3.93104	-0.801099
AC004988	lncRNA	0.000111	2.99e-06	-23.3	5.30649	-2.00728	down
AC004990	lncRNA	0.26373	0.18482	6.252	-2.59542	0.872707
AC004994	lncRNA	0.978	0.857	0.19	-8.56482	0.0063417
AC005006	lncRNA	0.85	0.624	-0.522	-8.42732	-0.046065
AC005009	lncRNA	0.000553	3.56e-05	-14	2.40687	-0.602152
AC005009	lncRNA	0.7585	0.5215	-0.7605	-8.18093	-0.298703
AC005013	lncRNA	0.996	0.954	0.06	-8.58431	0.00198997
AC005019	lncRNA	0.931	0.73	-0.365	-8.50748	-0.0290731
AC005037	lncRNA	0.313	0.126	1.84	-7.03714	0.918013
AC005042	lncRNA	0.821	0.591	-0.574	-8.39501	-0.0183105
AC005062	lncRNA	0.488133	0.329064	-3.46713	-5.56306	-0.477882
AC005064	lncRNA	3.71e-05	4.97e-07	33.6	7.34827	3.23975	up
AC005076	lncRNA	0.000371	2.05e-05	-16.15	3.18138	-1.11915
AC005083	lncRNA	0.14526	0.0645883	-7.19667	-2.26945	-0.583468
AC005086	lncRNA	0.586	0.325	-1.09	-7.94463	-0.675277
AC005090	lncRNA	0.994	0.942	0.077	-8.5829	0.00261883
AC005091	lncRNA	0.479	0.224	-1.39	-7.60746	-0.193976
AC005096	lncRNA	0.969	0.829	-0.228	-8.55533	-0.00727087
AC005104	lncRNA	0.998	0.986	0.0182	-8.58627	0.00057273
AC005150	lncRNA	0.972	0.837	-0.217	-8.55838	-0.00696333
AC005160	lncRNA	0.454	0.208	-1.45	-7.53751	-0.362696
AC005162	lncRNA	0.988	0.91	-0.12	-8.5779	-0.004007
AC005162	lncRNA	0.957	0.779	-0.297	-8.53398	-0.161693
AC005162	lncRNA	0.513067	0.352583	-1.67333	-6.76939	-0.202906
AC005165	lncRNA	0.179707	0.0783093	-4.78	-4.12467	-1.28325
AC005186	lncRNA	0.53	0.326267	1.33133	-7.56551	0.392202
AC005208	lncRNA	0.996	0.962	0.0497	-8.58499	0.0015617
AC005209	lncRNA	0.35	0.146	1.72	-7.19092	0.597742
AC005220	lncRNA	0.0198	0.00399	5.07	-3.17019	1.50152
AC005224	lncRNA	0.000242	1.04e-05	18.1	3.85345	1.65346
AC005224	lncRNA	0.0496	0.0125	-3.83	-4.49127	-0.941314
AC005224	lncRNA	0.00018	6.59e-06	19.9	4.38737	1.02738
AC005225	lncRNA	0.99	0.919	-0.107	-8.57956	-0.0486053
AC005225	lncRNA	0.3074	0.168545	-1.75	-5.81077	-0.922231
AC005225	lncRNA	0.0173	0.00337	-5.27	-2.97141	-1.15323
AC005234	lncRNA	0.0253	0.00544	-4.71	-3.53078	-2.10742	down
AC005237	lncRNA	0.586	0.322	-1.1	-7.93741	-0.303469
AC005244	lncRNA	0.968	0.824	-0.234	-8.55371	-0.0283212
AC005277	lncRNA	0.00407	0.000544	-7.92	-0.82427	-0.844154
AC005280	lncRNA	0.989	0.916	0.111	-8.57901	0.003552
AC005281	lncRNA	0.542	0.268	-1.25	-7.77194	-0.251205
AC005288	lncRNA	0.141	0.0446	2.67	-5.92924	0.756215
AC005291	lncRNA	0.998	0.986	0.0184	-8.58627	0.00298953
AC005301	lncRNA	0.973	0.842	0.209	-8.56024	0.0287507
AC005304	lncRNA	0.706	0.468	-0.785	-8.2372	-0.650667
AC005304	lncRNA	0.586	0.319	1.11	-7.92712	0.167939
AC005307	lncRNA	0.792	0.559	0.626	-8.36014	0.0205206
AC005323	lncRNA	0.46175	0.330075	-0.993625	-7.0871	-0.0286219
AC005323	lncRNA	0.793	0.6555	0.558145	-8.24977	0.145383
AC005329	lncRNA	0.276	0.106	1.97	-6.86463	0.523754
AC005329	lncRNA	0.586	0.323	-1.1	-7.93923	-0.302329
AC005332	lncRNA	0.194	0.0666	2.34	-6.36632	0.159284
AC005332	lncRNA	0.000999	8.24e-05	-11.8	1.41181	-0.839905
AC005332	lncRNA	0.454	0.208	-1.45	-7.53649	-0.39011
AC005332	lncRNA	0.000977	7.95e-05	-11.9	1.45441	-0.696821
AC005342	lncRNA	0.692	0.453	-0.815	-8.21214	-0.27804
AC005342	lncRNA	0.0212	0.00435	-4.97	-3.27035	-1.14654
AC005355	lncRNA	0.727	0.489	0.746	-8.26938	0.200652
AC005358	lncRNA	0.59	0.337	-1.06	-7.97579	-0.0389161
AC005358	lncRNA	0.979	0.868	0.175	-8.56814	0.00554827
AC005392	lncRNA	0.234	0.0852	2.15	-6.62965	1.15349
AC005394	lncRNA	0.615	0.371	0.984	-8.05485	0.402476
AC005394	lncRNA	0.96	0.795	0.275	-8.54145	0.151881
AC005410	lncRNA	0.5019	0.46844	-2.97205	-5.43422	-0.633326
AC005410	lncRNA	0.0078	0.00124	6.61	-1.80087	0.421141
AC005476	lncRNA	0.337953	0.29913	-5.098	-3.82503	-0.65893
AC005479	lncRNA	0.0351	0.00813	-4.27	-3.99767	-0.717907
AC005482	lncRNA	0.82	0.591	-0.574	-8.39474	-0.111876
AC005486	lncRNA	0.838	0.611	0.543	-8.41451	0.0179087
AC005487	lncRNA	0.728	0.49	0.745	-8.27072	0.306975
AC005498	lncRNA	0.512	0.247	-1.31	-7.69728	-0.259751
AC005515	lncRNA	0.242	0.0891	2.11	-6.67785	0.761446
AC005518	lncRNA	0.646	0.404	-0.913	-8.12402	-0.0332064
AC005519	lncRNA	0.586	0.316	-1.11	-7.92052	-0.390028
AC005523	lncRNA	0.828	0.599	-0.561	-8.40325	-0.332711
AC005529	lncRNA	1	1	0.000418	-8.58647	1.307e-05
AC005532	lncRNA	0.500593	0.337498	-3.21367	-5.68816	-0.581019
AC005534	lncRNA	0.925	0.722	-0.377	-8.50234	-0.0878233
AC005537	lncRNA	7.04e-06	2.28e-08	62.7	10.5611	5.426	up
AC005538	lncRNA	0.887	0.673	-0.448	-8.46805	-0.107165
AC005540	lncRNA	0.633	0.389	-0.944	-8.09454	-0.0308358
AC005544	lncRNA	0.088	0.0252	3.17	-5.29154	0.45464
AC005544	lncRNA	0.586	0.324	-1.09	-7.94228	-0.0422082
AC005549	lncRNA	0.638	0.394	0.933	-8.10456	0.0679313
AC005550	lncRNA	0.968	0.824	-0.234	-8.55379	-0.00811427
AC005550	lncRNA	0.586	0.326	1.09	-7.948	0.422529
AC005552	lncRNA	0.462	0.213	-1.43	-7.56063	-0.274292
AC005586	lncRNA	0.954	0.769	-0.31	-8.52914	-0.109926
AC005586	lncRNA	0.000202	7.89e-06	19.1	4.17854	3.07116	up
AC005606	lncRNA	0.6305	0.4515	0.7895	-7.76415	0.0761283
AC005618	lncRNA	0.586	0.321	-1.1	-7.93256	-0.186884
AC005632	lncRNA	0.000576	3.78e-05	-13.9	2.33454	-0.935051
AC005674	lncRNA	0.00229	0.000254	-9.32	0.07777	-1.29395
AC005674	lncRNA	0.0487965	0.0142537	-11.23	-0.585715	-0.910902
AC005692	lncRNA	0.958	0.784	-0.289	-8.53657	-0.0096295
AC005692	lncRNA	0.234	0.085	-2.15	-6.62699	-0.476991
AC005695	lncRNA	0.0396	0.00941	-4.12	-4.16629	-1.07675
AC005695	lncRNA	0.611	0.365	0.997	-8.04209	0.108002
AC005696	lncRNA	0.47	0.218	1.41	-7.58235	0.155372
AC005696	lncRNA	0.255	0.0957	-2.05	-6.75262	-0.24069
AC005699	lncRNA	0.6505	0.455183	-0.484833	-7.93358	-0.172031
AC005703	lncRNA	0.971	0.833	0.222	-8.55702	0.00689047
AC005703	lncRNA	0.913	0.706	0.399	-8.49219	0.114659
AC005703	lncRNA	0.493	0.234	1.36	-7.64752	0.126815
AC005703	lncRNA	0.266	0.101	-2.01	-6.81297	-0.693073
AC005703	lncRNA	0.236	0.0863	2.14	-6.64345	0.0968149
AC005722	lncRNA	0.00267	0.000312	8.92	-0.16689	0.586091
AC005722	lncRNA	0.312	0.126	-1.84	-7.03618	-0.270922
AC005725	lncRNA	0.336	0.138	1.77	-7.13363	0.466586
AC005730	lncRNA	0.972	0.835	-0.219	-8.55777	-0.0603263
AC005730	lncRNA	0.548	0.271	1.24	-7.78483	0.532574
AC005736	lncRNA	0.386035	0.269001	-13.8305	-1.10406	-1.19134
AC005736	lncRNA	0.176	0.0589	-2.44	-6.23238	-0.428348
AC005740	lncRNA	0.843	0.617	-0.534	-8.42003	-0.161698
AC005759	lncRNA	0.586	0.323	-1.1	-7.93858	-0.224464
AC005772	lncRNA	0.991	0.922	-0.103	-8.58008	-0.00329763
AC005774	lncRNA	0.553	0.275	1.23	-7.79727	0.0834417
AC005808	lncRNA	0.996	0.952	0.0633	-8.58406	0.0104481
AC005821	lncRNA	0.719667	0.572967	0.780333	-7.93606	0.287569
AC005823	lncRNA	0.476	0.222	-1.4	-7.59949	-0.121712
AC005823	lncRNA	0.0403	0.00961	-4.1	-4.19021	-0.847077
AC005828	lncRNA	0.964	0.812	0.251	-8.54876	0.00779073
AC005828	lncRNA	0.802	0.57	-0.607	-8.37262	-0.155707
AC005828	lncRNA	0.98	0.871	-0.171	-8.56902	-0.00542273
AC005828	lncRNA	0.987	0.905	0.125	-8.57709	0.0042696
AC005828	lncRNA	0.59	0.336	-1.07	-7.97282	-0.1088
AC005840	lncRNA	0.00266	0.000311	8.93	-0.16048	1.75913
AC005841	lncRNA	0.386	0.166	1.62	-7.31937	0.267704
AC005842	lncRNA	0.31995	0.25474	5.28967	-3.46027	1.30536
AC005845	lncRNA	0.934	0.734	0.359	-8.50988	0.050263
AC005865	lncRNA	0.555	0.38875	-1.3755	-7.42239	-0.720189
AC005865	lncRNA	0.5065	0.41435	-2.072	-6.48254	-0.341645
AC005871	lncRNA	0.00517	0.000742	-7.4	-1.18993	-1.66703
AC005871	lncRNA	0.526	0.257	1.28	-7.73399	0.724509
AC005899	lncRNA	0.000356	1.89e-05	16	3.15418	0.812634
AC005899	lncRNA	0.851	0.626	0.52	-8.42831	0.243191
AC005906	lncRNA	0.442521	0.281345	4.082	-4.64319	0.422597
AC005908	lncRNA	0.331	0.136	-1.78	-7.11445	-0.644821
AC005909	lncRNA	0.764	0.529	-0.677	-8.32337	-0.0717222
AC005920	lncRNA	0.332	0.136	-1.78	-7.11769	-0.601647
AC005920	lncRNA	0.586	0.319	-1.11	-7.92722	-3.66101
AC005920	lncRNA	0.622	0.362	-1.0245	-8.005	-0.23156
AC005920	lncRNA	0.5955	0.4266	-1.222	-7.5911	-0.128145
AC005921	lncRNA	0.018	0.00354	-5.21	-3.03036	-0.938403
AC005972	lncRNA	0.855	0.6365	-0.127	-8.42718	0.0295607
AC005993	lncRNA	0.000216	8.67e-06	18.8	4.06731	1.81885
AC005996	lncRNA	0.283	0.11	1.94	-6.89983	0.581993
AC005999	lncRNA	0.591	0.339	-1.06	-7.97989	-0.32669
AC006001	lncRNA	0.678	0.456667	-0.0123333	-8.01303	0.0262025
AC006001	lncRNA	0.339167	0.1837	0.347	-6.77476	0.0414274
AC006003	lncRNA	0.999	0.995	-0.006	-8.58645	-0.0016665
AC006004	lncRNA	0.964	0.813	0.249	-8.54948	0.0079287
AC006007	lncRNA	0.586	0.313	-1.12	-7.91232	-0.190406
AC006012	lncRNA	0.855	0.6615	0.48	-8.42355	0.0183822
AC006013	lncRNA	0.996	0.955	-0.0592	-8.58436	-0.00201727
AC006017	lncRNA	0.00706	0.0011	-6.8	-1.65182	-0.7832
AC006019	lncRNA	0.642667	0.477	-0.9571	-7.90664	-0.198224
AC006019	lncRNA	0.747	0.511	-0.708	-8.29944	-0.232785
AC006019	lncRNA	0.509	0.245	-1.32	-7.69072	-0.155371
AC006026	lncRNA	0.986	0.903	-0.129	-8.57654	-0.018283
AC006041	lncRNA	0.924	0.721	-0.378	-8.50178	-0.0132045
AC006042	lncRNA	0.084	0.0238	-3.22	-5.22695	-0.769706
AC006042	lncRNA	0.586	0.325	-1.09	-7.94491	-0.251337
AC006042	lncRNA	0.000435	2.52e-05	-15.1	2.81157	-1.75942
AC006055	lncRNA	0.497	0.237	-1.35	-7.65876	-0.414727
AC006058	lncRNA	9.51e-05	2.38e-06	-24.4	5.56848	-2.56281	down
AC006063	lncRNA	0.594	0.342	-1.05	-7.98799	-0.0413165
AC006065	lncRNA	0.89	0.676	-0.444	-8.47037	-0.0265662
AC006065	lncRNA	0.602954	0.549804	-2.17186	-6.36579	-0.349869
AC006076	lncRNA	0.626	0.382	0.959	-8.07961	0.186312
AC006111	lncRNA	0.853	0.628	-0.516	-8.4306	-0.132334
AC006111	lncRNA	0.0124	0.00222	5.8	-2.48448	0.866061
AC006115	lncRNA	0.981	0.874	-0.166	-8.56989	-0.00544717
AC006145	lncRNA	0.9635	0.8525	-0.1658	-8.54659	-0.00590595
AC006146	lncRNA	0.898	0.686	-0.428	-8.47815	-0.0230171
AC006148	lncRNA	0.593	0.369	-0.514	-7.84035	-0.269116
AC006148	lncRNA	0.682	0.442	0.835	-8.19423	0.427492
AC006150	lncRNA	0.22	0.0779	2.22	-6.53472	0.716534
AC006159	lncRNA	0.945	0.751	0.336	-8.51957	0.0109914
AC006160	lncRNA	0.714	0.475	-0.772	-8.24836	-0.386401
AC006205	lncRNA	0.875	0.658	-0.47	-8.45636	-0.0154747
AC006205	lncRNA	0.981	0.878	-0.162	-8.57074	-0.0401945
AC006206	lncRNA	0.000305	1.47e-05	16.8	3.44732	4.06176	up
AC006206	lncRNA	0.22024	0.0991415	3.81	-3.769	0.739823
AC006207	lncRNA	0.0558	0.0144	-3.69	-4.6569	-0.568052
AC006213	lncRNA	0.978	0.858	0.188	-8.56521	0.0546362
AC006213	lncRNA	0.0219	0.00453	4.92	-3.31812	1.21339
AC006252	lncRNA	0.4525	0.343946	-3.3415	-4.94339	-0.0851328
AC006262	lncRNA	0.40609	0.288782	-3.6315	-4.62155	-0.352982
AC006270	lncRNA	0.973	0.843	-0.209	-8.56038	-0.00726417
AC006296	lncRNA	0.129	0.04	-2.77	-5.80896	-0.816243
AC006296	lncRNA	0.959	0.787	0.286	-8.53778	0.0804956
AC006299	lncRNA	0.922667	0.810667	-0.188233	-8.50445	-0.0819925
AC006305	lncRNA	0.000414	2.35e-05	15.3	2.8962	5.33287	up
AC006305	lncRNA	0.959	0.791	0.28	-8.53964	0.0089744
AC006329	lncRNA	0.0693	0.0188	3.44	-4.96051	1.54104
AC006333	lncRNA	0.8504	0.6846	-0.47786	-8.37086	-0.133015
AC006333	lncRNA	0.00109	9.3e-05	-11.5	1.26897	-1.45679
AC006357	lncRNA	0.00359	0.000463	8.2	-0.63179	2.40685	up
AC006369	lncRNA	0.994	0.937	0.0829	-8.58235	0.00268427
AC006372	lncRNA	0.995	0.947	-0.0695	-8.58357	-0.0024231
AC006372	lncRNA	0.586	0.314	-1.12	-7.91454	-0.462807
AC006372	lncRNA	0.576	0.294	-1.17	-7.85589	-0.259689
AC006378	lncRNA	0.622	0.364	-1.023	-8.00166	-0.201247
AC006387	lncRNA	0.958	0.782	0.293	-8.53545	0.143001
AC006435	lncRNA	0.979	0.869	-0.174	-8.56837	-0.0056274
AC006435	lncRNA	0.7935	0.639	-0.4825	-8.28514	-0.1627
AC006441	lncRNA	0.815	0.584	0.585	-8.3877	0.261081
AC006441	lncRNA	0.329	0.135	-1.79	-7.10697	-0.236186
AC006441	lncRNA	0.422	0.22205	-1.565	-7.34781	-0.430111
AC006449	lncRNA	0.742	0.505	-0.718	-8.29206	-0.417051
AC006449	lncRNA	0.480925	0.387933	-3.429	-4.95165	-0.411058
AC006449	lncRNA	0.935	0.735	-0.358	-8.5106	-0.0454655
AC006450	lncRNA	0.426	0.19	-1.52	-7.45167	-0.22
AC006450	lncRNA	0.723	0.485	-0.754	-8.26327	-0.293941
AC006450	lncRNA	0.961	0.802	0.265	-8.54469	0.144083
AC006455	lncRNA	0.867	0.647	-0.487	-8.44726	-0.123013
AC006458	lncRNA	0.969	0.828	-0.229	-8.55501	-0.00751423
AC006460	lncRNA	0.512333	0.331067	-1.17267	-7.4632	-0.529641
AC006480	lncRNA	0.309	0.124	-1.85	-7.02038	-0.774417
AC006482	lncRNA	0.786	0.554	-0.635	-8.3534	-0.188123
AC006487	lncRNA	1	0.998	-0.00234	-8.58647	-7.303e-05
AC006487	lncRNA	0.996	0.968	0.0428	-8.58537	0.00134683
AC006504	lncRNA	0.962	0.807	0.258	-8.54674	0.034025
AC006504	lncRNA	0.661	0.42	-0.88	-8.15432	-0.028608
AC006504	lncRNA	0.0601	0.0158	3.6	-4.76277	1.79323
AC006547	lncRNA	0.0988	0.029	-3.04	-5.45043	-1.37002
AC006547	lncRNA	0.625	0.381	0.961	-8.07754	0.0346873
AC006557	lncRNA	0.578	0.295	1.17	-7.8605	0.318977
AC006581	lncRNA	0.00182	0.000186	-9.95	0.44917	-0.705451
AC006947	lncRNA	0.998	0.985	0.0203	-8.58622	0.00065
AC006960	lncRNA	0.595	0.345	-1.04	-7.99536	-0.0409861
AC006960	lncRNA	0.000267	1.21e-05	17.5	3.67646	0.994664
AC006967	lncRNA	0.4125	0.20185	1.615	-7.29096	0.658348
AC006974	lncRNA	0.956	0.776	-0.301	-8.5326	-0.169619
AC007003	lncRNA	0.7025	0.464	-0.0005	-8.2302	0.123605
AC007009	lncRNA	0.907	0.698	0.411	-8.4866	0.013311
AC007014	lncRNA	0.969	0.827	-0.23	-8.55482	-0.0078876
AC007036	lncRNA	0.918	0.713	-0.39	-8.49645	-0.0175418
AC007036	lncRNA	0.00919	0.00153	-6.31	-2.04309	-0.669765
AC007038	lncRNA	0.0465	0.0115	-3.91	-4.39834	-0.875282
AC007064	lncRNA	0.963	0.808	-0.256	-8.54744	-0.0335642
AC007066	lncRNA	0.05455	0.01451	0.675	-4.41786	-0.140655
AC007091	lncRNA	0.676	0.436	-0.848	-8.18311	-0.138646
AC007092	lncRNA	0.881	0.665	-0.459	-8.46228	-0.0161746
AC007098	lncRNA	0.242925	0.1035	2.505	-6.17219	0.949194
AC007099	lncRNA	0.00697	0.00108	-6.82	-1.63251	-1.66213
AC007099	lncRNA	0.344	0.143	1.74	-7.16703	0.155208
AC007100	lncRNA	0.976	0.85	-0.2	-8.56264	-0.00667843
AC007106	lncRNA	0.359	0.151	-1.7	-7.22315	-0.297111
AC007114	lncRNA	0.0529	0.01386	-3.93	-4.40754	-1.1178
AC007114	lncRNA	0.345	0.143	-1.74	-7.16983	-0.426907
AC007126	lncRNA	0.995	0.943	0.0757	-8.58303	0.00238683
AC007128	lncRNA	0.598	0.35	-1.03	-8.00611	-0.0605755
AC007128	lncRNA	0.65	0.408	-0.904	-8.13164	-0.144042
AC007132	lncRNA	0.468	0.2485	0.4015	-7.56616	0.174949
AC007159	lncRNA	0.528	0.258	-1.28	-7.73735	-0.441655
AC007161	lncRNA	0.9845	0.8915	-0.1438	-8.57265	-0.00547162
AC007163	lncRNA	0.589	0.334	-1.07	-7.96691	-0.146146
AC007179	lncRNA	0.98	0.873	0.168	-8.56947	0.00520317
AC007179	lncRNA	0.717571	0.522429	-0.0833714	-8.1102	0.186155
AC007182	lncRNA	0.5	0.238	-1.34	-7.66515	-0.630117
AC007207	lncRNA	0.7765	0.5595	-0.6705	-8.26874	-0.169831
AC007207	lncRNA	0.40365	0.2564	2.0215	-6.70071	0.460539
AC007216	lncRNA	0.931	0.731	0.364	-8.50786	0.0119173
AC007216	lncRNA	0.443	0.201	-1.47	-7.50496	-0.733258
AC007216	lncRNA	0.96	0.798	-0.271	-8.54279	-0.0961355
AC007216	lncRNA	0.549	0.272	1.23	-7.78826	0.666866
AC007220	lncRNA	0.964	0.813	-0.249	-8.54945	-0.0433656
AC007221	lncRNA	0.996	0.948	0.0684	-8.58366	0.0370854
AC007223	lncRNA	0.853	0.628	-0.516	-8.43075	-0.0172293
AC007249	lncRNA	0.00683	0.00105	6.86	-1.60182	1.30191
AC007249	lncRNA	0.9445	0.7545	0.3305	-8.52101	0.139149
AC007255	lncRNA	0.3105	0.1245	0.08	-7.02273	-0.376043
AC007262	lncRNA	0.495	0.235	1.35	-7.65212	0.560526
AC007272	lncRNA	0.00255	0.000294	-9.03	-0.09624	-1.30955
AC007277	lncRNA	0.996	0.966	0.0454	-8.58523	0.00154507
AC007278	lncRNA	0.651	0.409	0.902	-8.1343	0.0438711
AC007278	lncRNA	0.597	0.348	-1.04	-8.00334	-0.0373074
AC007285	lncRNA	0.6065	0.38	-0.5105	-7.87225	-0.160235
AC007285	lncRNA	0.261	0.0988	-2.03	-6.78667	-0.848259
AC007298	lncRNA	0.956	0.776	0.301	-8.53267	0.00950137
AC007314	lncRNA	0.0214	0.0044	4.95	-3.28279	1.00179
AC007319	lncRNA	0.637667	0.379	-0.14	-7.9903	0.254846
AC007327	lncRNA	0.971	0.833	0.223	-8.55685	0.0070863
AC007333	lncRNA	0.927	0.726	-0.371	-8.50484	-0.197534
AC007333	lncRNA	0.992	0.928	-0.0951	-8.58104	-0.00326917
AC007336	lncRNA	0.00131	0.00012	-10.9	0.96563	-1.13321
AC007342	lncRNA	0.00732	0.00115	6.72	-1.70874	0.854966
AC007342	lncRNA	0.4977	0.38695	-1.826	-6.42869	-0.272064
AC007342	lncRNA	0.126	0.039	-2.79	-5.78065	-0.870983
AC007344	lncRNA	0.3813	0.250867	-1.87	-6.48534	-0.517529
AC007347	lncRNA	0.745	0.509	-0.712	-8.29639	-0.29299
AC007349	lncRNA	0.63	0.386	-0.95	-8.08824	-0.0331969
AC007349	lncRNA	0.587	0.328	1.08	-7.95225	0.124032
AC007349	lncRNA	0.996	0.971	0.0386	-8.58557	0.017488
AC007362	lncRNA	0.996	0.975	-0.0332	-8.58581	-0.00104683
AC007364	lncRNA	0.108	0.0322	-2.95	-5.56783	-0.360958
AC007365	lncRNA	0.586	0.314	1.12	-7.91539	0.121806
AC007368	lncRNA	0.61285	0.43888	-1.5795	-7.20099	-0.432222
AC007368	lncRNA	0.586	0.305	-1.14	-7.88913	-0.264609
AC007370	lncRNA	0.586	0.32	-1.1	-7.93164	-0.0818884
AC007370	lncRNA	0.114	0.0347	-2.89	-5.64897	-0.646903
AC007376	lncRNA	0.62	0.375	-0.974	-8.06454	-0.322871
AC007383	lncRNA	0.776	0.5585	-0.673	-8.26961	-0.131055
AC007384	lncRNA	0.4942	0.400625	-2.138	-6.11707	-0.223457
AC007388	lncRNA	0.537299	0.44056	-6.03145	-4.25218	-0.745933
AC007389	lncRNA	0.888778	0.729111	-0.155478	-8.41457	-0.045982
AC007389	lncRNA	0.816	0.586	0.582	-8.38957	0.270244
AC007391	lncRNA	0.0362	0.00843	-4.23	-4.0391	-0.651912
AC007402	lncRNA	0.981	0.878	0.162	-8.57084	0.12161
AC007403	lncRNA	0.77	0.536	0.664	-8.33251	0.377484
AC007405	lncRNA	0.000237	1.01e-05	-18.2	3.88814	-1.62174
AC007405	lncRNA	0.538823	0.440481	-3.06137	-5.74089	-0.301959
AC007405	lncRNA	0.5052	0.422025	-2.1895	-6.3394	-0.253368
AC007406	lncRNA	0.694	0.455	-0.81	-8.21611	-0.0619273
AC007406	lncRNA	0.855	0.631	0.511	-8.43361	0.262867
AC007406	lncRNA	0.37865	0.2398	-1.48	-6.41282	-0.0489553
AC007406	lncRNA	0.678	0.438	-0.844	-8.18703	-0.133308
AC007406	lncRNA	0.221	0.0786	-2.21	-6.54394	-0.176315
AC007422	lncRNA	0.993	0.935	-0.0857	-8.58206	-0.053907
AC007422	lncRNA	0.433	0.195	-1.5	-7.4721	-0.156075
AC007431	lncRNA	0.961	0.801	0.266	-8.54426	0.00870917
AC007431	lncRNA	0.0162	0.00309	-5.38	-2.87018	-0.619417
AC007448	lncRNA	0.996	0.973	-0.0355	-8.58571	-0.0012188
AC007448	lncRNA	0.127	0.0395	-2.78	-5.79358	-0.616687
AC007450	lncRNA	0.576	0.294	-1.17	-7.85627	-1.08265
AC007463	lncRNA	0.5955	0.4494	0.9735	-7.56212	0.203212
AC007493	lncRNA	0.332	0.136	-1.78	-7.11681	-0.502958
AC007493	lncRNA	0.869	0.649	0.484	-8.44906	0.139212
AC007494	lncRNA	0.504	0.242	1.33	-7.67812	0.731026
AC007495	lncRNA	0.8836	0.7514	0.248148	-8.42418	0.0664933
AC007495	lncRNA	0.32725	0.1603	-2.275	-6.44166	-0.390418
AC007496	lncRNA	0.837	0.609	0.545	-8.41292	0.121236
AC007496	lncRNA	0.599	0.35	-1.03	-8.00831	-0.225255
AC007513	lncRNA	0.614	0.369	-0.989	-8.05047	-0.0557527
AC007527	lncRNA	0.9695	0.831	-0.2255	-8.55419	-0.00737513
AC007529	lncRNA	0.51	0.246	1.32	-7.69343	0.334032
AC007529	lncRNA	4.64e-05	7.43e-07	31	6.89826	2.91155	up
AC007533	lncRNA	0.923	0.72	-0.38	-8.50098	-0.0126495
AC007540	lncRNA	0.998	0.985	0.0201	-8.58623	0.0104653
AC007541	lncRNA	0.0651	0.0174	-3.51	-4.87336	-0.286027
AC007552	lncRNA	0.876	0.659	-0.469	-8.45742	-0.0161189
AC007556	lncRNA	0.682	0.442	-0.835	-8.19452	-0.38297
AC007557	lncRNA	0.979	0.864	-0.18	-8.56701	-0.00641383
AC007557	lncRNA	0.995	0.946	0.0714	-8.58341	0.0302592
AC007557	lncRNA	0.649	0.407	-0.906	-8.1301	-0.46135
AC007557	lncRNA	0.596	0.347	-1.04	-8.00102	-0.112229
AC007563	lncRNA	0.397	0.173	1.59	-7.35826	0.460514
AC007563	lncRNA	0.772	0.537	-0.662	-8.33391	-0.105703
AC007566	lncRNA	0.00227	0.000262	-9.705	0.270725	-1.22513
AC007569	lncRNA	0.941	0.825	-0.2132	-8.52596	-0.0751262
AC007570	lncRNA	0.0168	0.00325	-5.32	-2.92903	-0.89871
AC007595	lncRNA	0.963	0.81	-0.253	-8.54822	-0.00831987
AC007598	lncRNA	0.4955	0.30325	-1.4155	-7.47356	-0.396857
AC007598	lncRNA	0.996	0.969	-0.0409	-8.58546	-0.0013039
AC007599	lncRNA	0.473	0.221	-1.4	-7.59289	-0.0682212
AC007601	lncRNA	0.991	0.924	0.1	-8.58044	0.0034517
AC007603	lncRNA	0.905	0.696	-0.415	-8.48492	-0.098875
AC007608	lncRNA	0.959	0.79	-0.281	-8.53952	-0.00944747
AC007608	lncRNA	0.0415	0.00999	4.06	-4.23499	0.350281
AC007608	lncRNA	0.16313	0.065379	-4.59	-4.14375	-1.31483
AC007610	lncRNA	0.804	0.572	-0.604	-8.37494	-0.11981
AC007610	lncRNA	0.978	0.86	0.186	-8.56582	0.0427266
AC007611	lncRNA	0.416067	0.352087	-0.903767	-6.19299	-0.168516
AC007613	lncRNA	0.736	0.499	-0.73	-8.28262	-0.0242797
AC007614	lncRNA	0.3471	0.295107	0.600333	-5.23217	-0.299826
AC007619	lncRNA	0.0171	0.00331	5.29	-2.95124	1.02809
AC007620	lncRNA	0.0266	0.00577	-4.64	-3.59901	-0.735538
AC007622	lncRNA	0.7905	0.6365	-0.59515	-8.23583	-0.305347
AC007631	lncRNA	0.984	0.89	-0.145	-8.57379	-0.00494067
AC007637	lncRNA	0.688	0.4375	-0.869	-8.14	-0.578944
AC007638	lncRNA	0.996	0.953	-0.0614	-8.5842	-0.00191733
AC007638	lncRNA	0.995	0.943	-0.075	-8.5831	-0.0301285
AC007639	lncRNA	0.688	0.448	0.823	-8.20521	0.122881
AC007652	lncRNA	0.815	0.585	-0.583	-8.38887	-0.0378684
AC007655	lncRNA	0.649	0.407	-0.905	-8.13076	-0.0326911
AC007656	lncRNA	0.681	0.441	-0.836	-8.19339	-0.0723735
AC007663	lncRNA	0.43011	0.319004	-9.0495	-2.2064	-0.938358
AC007666	lncRNA	0.0394	0.00936	4.12	-4.16044	0.927223
AC007686	lncRNA	0.484	0.282	-1.404	-7.52231	-0.0740101
AC007688	lncRNA	0.95	0.759	-0.324	-8.52397	-0.0732133
AC007728	lncRNA	0.9055	0.735	-0.1885	-8.48753	-0.0212103
AC007728	lncRNA	0.4385	0.202	-0.245	-7.45721	-0.0542245
AC007743	lncRNA	0.619	0.50365	-1.096	-7.64698	-0.471244
AC007749	lncRNA	0.586	0.309	-1.13	-7.90035	-0.232949
AC007750	lncRNA	0.988	0.91	-0.12	-8.57789	-0.0038681
AC007773	lncRNA	0.000502	3.1e-05	14.5	2.56863	1.51599
AC007785	lncRNA	0.586	0.325	1.09	-7.94406	0.318254
AC007786	lncRNA	0.3085	0.1319	2.005	-6.80698	0.509924
AC007823	lncRNA	0.0779	0.0217	3.31	-5.12185	0.499204
AC007834	lncRNA	0.115	0.0348	2.89	-5.65379	0.681284
AC007848	lncRNA	1.3e-06	5.74e-10	132	13.3506	6.79545	up
AC007848	lncRNA	0.654	0.412	0.895	-8.14041	0.57707
AC007849	lncRNA	0.0443	0.0108	3.97	-4.32776	0.300009
AC007861	lncRNA	0.776	0.542	0.654	-8.34011	0.0416363
AC007861	lncRNA	0.878	0.662	0.465	-8.45943	0.232903
AC007878	lncRNA	0.996	0.949	-0.0669	-8.58378	-0.00347767
AC007879	lncRNA	0.387	0.167	-1.62	-7.32523	-0.546525
AC007879	lncRNA	0.0198	0.00399	-5.07	-3.17034	-1.1021
AC007879	lncRNA	0.294	0.116	-1.9	-6.9529	-0.22729
AC007879	lncRNA	0.874	0.656	0.473	-8.45489	0.187186
AC007881	lncRNA	0.972	0.836	0.218	-8.55815	0.0069641
AC007907	lncRNA	0.539	0.265	-1.26	-7.76434	-0.0962225
AC007920	lncRNA	0.0915	0.0264	-3.13	-5.34393	-0.55905
AC007920	lncRNA	0.936	0.737	0.356	-8.51136	0.056236
AC007922	lncRNA	0.839	0.612	-0.542	-8.4153	-0.14351
AC007922	lncRNA	0.607	0.361	1.01	-8.03316	0.128001
AC007922	lncRNA	0.609	0.363	-1	-8.03817	-0.162592
AC007923	lncRNA	0.996	0.974	0.034	-8.58577	0.0010824
AC007938	lncRNA	0.0972	0.0285	-3.06	-5.42814	-0.736624
AC007948	lncRNA	0.586	0.322	1.1	-7.93686	0.106689
AC007950	lncRNA	0.996	0.958	-0.0549	-8.58466	-0.00403203
AC007952	lncRNA	0.0773	0.0215	-3.31	-5.11071	-0.209028
AC007952	lncRNA	0.72	0.482	-0.76	-8.25838	-0.0695201
AC007952	lncRNA	0.58	0.298	-1.16	-7.86807	-0.136916
AC007952	lncRNA	0.683	0.443	0.833	-8.19625	0.0855003
AC007953	lncRNA	0.986	0.903	-0.129	-8.57653	-0.0040952
AC007966	lncRNA	0.506343	0.353	11.9353	-2.88567	1.31561
AC007991	lncRNA	0.0351	0.00814	-4.27	-3.9989	-0.423651
AC007991	lncRNA	0.994	0.939	-0.0807	-8.58256	-0.002763
AC007991	lncRNA	0.948	0.756	0.328	-8.52242	0.0810121
AC008011	lncRNA	0.982	0.879	-0.16	-8.5712	-0.0503079
AC008014	lncRNA	0.886	0.744667	-0.162233	-8.45157	-0.0953356
AC008026	lncRNA	0.719	0.481	0.762	-8.25679	0.178113
AC008040	lncRNA	0.800667	0.590333	0.610333	-8.31901	0.153763
AC008050	lncRNA	0.844	0.617	0.533	-8.42073	0.141829
AC008056	lncRNA	0.229	0.0825	-2.17	-6.59623	-0.642575
AC008056	lncRNA	0.853	0.628	0.515	-8.43101	0.256515
AC008060	lncRNA	0.865	0.645	-0.491	-8.44521	-0.0160936
AC008060	lncRNA	0.996	0.967	-0.0432	-8.58535	-0.00138323
AC008060	lncRNA	0.984	0.891	0.144	-8.57401	0.00451203
AC008063	lncRNA	0.26	0.0979	2.04	-6.7766	0.896004
AC008063	lncRNA	0.902	0.692	-0.42	-8.48216	-0.0401577
AC008067	lncRNA	0.904	0.695	0.416	-8.48406	0.076811
AC008074	lncRNA	0.0004775	2.92e-05	14.8	2.69185	1.65611
AC008080	lncRNA	0.992	0.93	-0.0927	-8.58131	-0.00303597
AC008080	lncRNA	0.207	0.0722	-2.28	-6.45278	-0.445985
AC008080	lncRNA	0.623	0.3785	0.023	-8.0715	-0.0383149
AC008083	lncRNA	0.109	0.0326	2.94	-5.58201	0.52902
AC008083	lncRNA	0.6325	0.444	-1.08	-7.78334	-0.23142
AC008088	lncRNA	0.971	0.834	-0.22	-8.55742	-0.0967897
AC008105	lncRNA	0.00156	0.000151	10.4	0.69581	0.955041
AC008105	lncRNA	0.0696	0.0189	3.43	-4.96809	0.108965
AC008109	lncRNA	0.772	0.538	0.661	-8.33476	0.022063
AC008114	lncRNA	0.564	0.284	1.2	-7.82492	0.708371
AC008115	lncRNA	0.0171	0.00332	-5.29	-2.95579	-0.560309
AC008115	lncRNA	0.645	0.402	0.915	-8.12126	0.147282
AC008124	lncRNA	0.0198	0.004	-5.06	-3.17384	-0.515808
AC008125	lncRNA	0.0102	0.00175	6.12	-2.20457	0.456995
AC008127	lncRNA	0.996	0.958	-0.0556	-8.58461	-0.00180013
AC008147	lncRNA	0.424	0.189	-1.52	-7.44335	-0.309663
AC008147	lncRNA	0.00133	0.000122	10.9	0.94637	1.79529
AC008147	lncRNA	0.149	0.048	2.61	-6.01042	0.452663
AC008149	lncRNA	0.0476	0.0119	3.88	-4.43209	1.08062
AC008154	lncRNA	0.301	0.119	-1.88	-6.98413	-0.233703
AC008154	lncRNA	0.924	0.72	-0.379	-8.50136	-0.151689
AC008164	lncRNA	0.9885	0.9125	-0.0219	-8.57808	-0.000694735
AC008175	lncRNA	0.693	0.5635	-0.8327	-7.95867	-0.117312
AC008243	lncRNA	0.476043	0.372437	1.64	-5.96775	0.133974
AC008250	lncRNA	0.945	0.751	-0.336	-8.51946	-0.11865
AC008268	lncRNA	3.02e-06	4.46e-09	-87.3	11.9802	-6.20001	down
AC008269	lncRNA	0.972	0.838	0.215	-8.55883	0.00693263
AC008269	lncRNA	0.957	0.779	-0.297	-8.53398	-0.198612
AC008277	lncRNA	0.646	0.404	0.912	-8.1248	0.247289
AC008278	lncRNA	0.507	0.243	-1.32	-7.68476	-0.642748
AC008278	lncRNA	0.586	0.306	-1.14	-7.89277	-0.202048
AC008378	lncRNA	0.599	0.351	-1.03	-8.01053	-0.823917
AC008406	lncRNA	0.641	0.398	-0.925	-8.11181	-0.881263
AC008406	lncRNA	0.971	0.833	0.222	-8.557	0.00693477
AC008413	lncRNA	1	0.998	0.00216	-8.58647	6.723e-05
AC008415	lncRNA	0.882	0.666	-0.459	-8.46248	-0.285508
AC008429	lncRNA	0.48325	0.371802	-0.062	-6.41364	-0.136315
AC008429	lncRNA	0.00196	0.000207	-9.73	0.32276	-1.89603
AC008434	lncRNA	0.768	0.534	-0.669	-8.32926	-0.238622
AC008438	lncRNA	0.812	0.6195	-0.3325	-8.34777	-0.101942
AC008438	lncRNA	0.00948	0.00159	-6.26	-2.09033	-0.77183
AC008440	lncRNA	0.983	0.883	0.155	-8.57205	0.00520843
AC008440	lncRNA	0.156	0.0506	-2.57	-6.06786	-1.32825
AC008440	lncRNA	0.586	0.32	1.11	-7.93026	0.537724
AC008443	lncRNA	0.741	0.505	0.719	-8.29134	0.138995
AC008443	lncRNA	0.794	0.561	-0.622	-8.36236	-0.0420549
AC008443	lncRNA	0.965	0.815	-0.246	-8.55026	-0.0086458
AC008443	lncRNA	0.2975	0.11825	-1.9	-6.95576	-0.698204
AC008443	lncRNA	0.71225	0.606875	-0.792	-7.94851	-0.062622
AC008448	lncRNA	0.587	0.33	1.08	-7.9568	0.398452
AC008453	lncRNA	0.596	0.346	-1.04	-7.99747	-0.0377034
AC008456	lncRNA	0.571	0.289	-1.19	-7.84226	-0.292011
AC008464	lncRNA	0.0832	0.0235	-3.23	-5.21382	-0.743752
AC008467	lncRNA	0.00046	2.74e-05	14.8	2.71551	0.927105
AC008494	lncRNA	0.000944	7.59e-05	-12	1.50983	-0.949144
AC008496	lncRNA	0.66	0.417	0.885	-8.14982	0.649991
AC008505	lncRNA	0.72375	0.5315	-0.356275	-8.18396	-0.129112
AC008507	lncRNA	0.72	0.482	-0.759	-8.25874	-0.0795803
AC008514	lncRNA	0.610667	0.37	-1.031	-7.97953	-0.230903
AC008517	lncRNA	0.9	0.688	0.425	-8.47968	0.0223389
AC008525	lncRNA	0.995	0.947	-0.0702	-8.58351	-0.00231433
AC008534	lncRNA	0.943	0.748	-0.339	-8.51806	-0.160965
AC008539	lncRNA	0.0621	0.0164	-3.56	-4.80667	-0.629384
AC008543	lncRNA	0.393	0.17	-1.6	-7.34279	-0.204057
AC008549	lncRNA	0.528333	0.308533	-0.860333	-7.62522	-0.29021
AC008549	lncRNA	0.594	0.343	1.05	-7.99096	0.197979
AC008551	lncRNA	0.667	0.426	0.866	-8.16659	0.167671
AC008555	lncRNA	0.7765	0.5645	0.4515	-8.22419	0.139288
AC008555	lncRNA	0.606503	0.445303	-2.641	-6.1521	-0.275553
AC008555	lncRNA	0.819	0.5895	-0.577	-8.39254	-0.127316
AC008568	lncRNA	0.589	0.334	-1.07	-7.96857	-0.142617
AC008574	lncRNA	0.945	0.752	-0.335	-8.51992	-0.0111363
AC008588	lncRNA	0.959	0.789	-0.282	-8.53898	-0.0309146
AC008591	lncRNA	0.994	0.9525	-0.02955	-8.58355	-0.000970385
AC008592	lncRNA	0.5575	0.341	-1.2045	-7.74692	-0.354773
AC008592	lncRNA	0.224	0.0798	-2.2	-6.56067	-0.858414
AC008592	lncRNA	0.0467	0.0116	-3.91	-4.40343	-0.850183
AC008601	lncRNA	0.957	0.78	0.296	-8.53444	0.0091526
AC008609	lncRNA	0.502	0.32365	-1.474	-7.36523	-0.454277
AC008610	lncRNA	0.595	0.345	1.04	-7.99448	0.557428
AC008619	lncRNA	0.748	0.512	-0.705	-8.30167	-0.0241503
AC008627	lncRNA	0.996	0.973	-0.0355	-8.58571	-0.00113247
AC008629	lncRNA	0.4305	0.2145	-1.54	-7.3983	-0.607178
AC008629	lncRNA	0.968	0.824	0.235	-8.55348	0.00729593
AC008632	lncRNA	0.5055	0.244	0.14	-7.67002	0.445248
AC008641	lncRNA	0.64	0.397	-0.928	-8.10963	-0.251753
AC008652	lncRNA	0.86	0.637	-0.503	-8.43831	-0.0164121
AC008659	lncRNA	0.858	0.635	-0.506	-8.43655	-0.263776
AC008662	lncRNA	0.91	0.702	-0.405	-8.48935	-0.0134055
AC008662	lncRNA	0.953	0.768	-0.312	-8.52862	-0.0103515
AC008663	lncRNA	0.825	0.596	-0.566	-8.39997	-0.270437
AC008663	lncRNA	0.9775	0.871	0.10925	-8.56162	-0.0060067
AC008663	lncRNA	0.923	0.719	-0.381	-8.5004	-0.0841442
AC008667	lncRNA	0.802	0.571	-0.607	-8.37288	-0.281385
AC008667	lncRNA	0.958	0.784	-0.29	-8.53634	-0.00962497
AC008667	lncRNA	0.635	0.392	-0.938	-8.09972	-0.130487
AC008669	lncRNA	7.58e-05	1.69e-06	-26.2	5.9642	-2.7519	down
AC008680	lncRNA	0.265	0.101	2.01	-6.80667	0.318291
AC008691	lncRNA	0.60825	0.3765	-0.66425	-7.92672	-0.366672
AC008696	lncRNA	0.852	0.627	-0.518	-8.42922	-0.017421
AC008700	lncRNA	0.53825	0.4488	1.4435	-7.0004	0.343453
AC008705	lncRNA	0.199	0.0686	2.32	-6.39751	0.511181
AC008708	lncRNA	0.839	0.612	-0.541	-8.41575	-0.0721234
AC008708	lncRNA	0.597	0.348	1.04	-8.00235	0.358254
AC008728	lncRNA	0.956	0.776	0.3	-8.53276	0.0098337
AC008731	lncRNA	0.518	0.251	-1.3	-7.71371	-0.80563
AC008736	lncRNA	0.412	0.182	-1.55	-7.40624	-0.178837
AC008741	lncRNA	0.666	0.425	-0.87	-8.16361	-0.505664
AC008752	lncRNA	0.979	0.867	-0.177	-8.56774	-0.00609367
AC008752	lncRNA	0.923	0.719	0.382	-8.50019	0.0822803
AC008771	lncRNA	0.03115	0.00704	4.465	-3.79428	0.52599
AC008780	lncRNA	0.829	0.601	-0.558	-8.40477	-0.0449467
AC008780	lncRNA	0.118	0.0358	-2.86	-5.68578	-0.88344
AC008781	lncRNA	0.0543	0.014	-3.72	-4.61943	-0.664138
AC008799	lncRNA	0.983	0.889	0.147	-8.57345	0.0049587
AC008808	lncRNA	0.6582	0.528	0.861667	-7.44606	0.177932
AC008808	lncRNA	0.969	0.826	0.232	-8.55423	0.00740187
AC008825	lncRNA	0.986	0.901	-0.13	-8.57626	-0.00527633
AC008840	lncRNA	0.602	0.52515	1.1548	-7.52035	0.218112
AC008852	lncRNA	0.46	0.212	-1.43	-7.55475	-0.233404
AC008869	lncRNA	0.692	0.453	0.815	-8.21198	0.278832
AC008870	lncRNA	0.882	0.667	-0.458	-8.46316	-0.233932
AC008870	lncRNA	0.211	0.0741	2.26	-6.48049	0.531011
AC008870	lncRNA	0.521	0.253	1.29	-7.72112	0.475573
AC008870	lncRNA	0.671	0.43	-0.859	-8.17335	-0.186504
AC008871	lncRNA	0.629	0.385	-0.953	-8.08506	-0.0332832
AC008883	lncRNA	0.563	0.283	1.21	-7.8214	0.30055
AC008883	lncRNA	0.508	0.244	1.32	-7.68614	0.318344
AC008885	lncRNA	0.996	0.961	0.0519	-8.58485	0.00164577
AC008892	lncRNA	0.986	0.9	0.132	-8.57605	0.00422717
AC008894	lncRNA	0.00138	0.000129	-10.7	0.87826	-1.31677
AC008897	lncRNA	0.978	0.862	0.184	-8.56629	0.00594553
AC008906	lncRNA	0.0994	0.0293	-3.04	-5.45946	-1.1164
AC008915	lncRNA	0.160034	0.074696	-13.1967	-0.07553	-1.02802
AC008937	lncRNA	0.693	0.454	-0.812	-8.21454	-0.0407941
AC008937	lncRNA	0.464	0.214	1.42	-7.56485	0.544938
AC008938	lncRNA	0.962	0.805	-0.26	-8.54608	-0.044334
AC008940	lncRNA	0.998	0.988	0.0161	-8.58631	0.000932
AC008948	lncRNA	0.601	0.354	1.02	-8.01648	0.189273
AC008957	lncRNA	0.709	0.468	-0.842	-8.12399	-0.329375
AC008966	lncRNA	0.689333	0.446333	0.512	-8.15358	0.193792
AC008991	lncRNA	0.694	0.455	-0.811	-8.21554	-0.0258602
AC008993	lncRNA	0.5645	0.357	-0.637	-7.7084	-0.00665405
AC009019	lncRNA	0.4768	0.312223	-1.50867	-6.59046	-0.481808
AC009021	lncRNA	0.892	0.678	-0.44	-8.47226	-0.0712532
AC009021	lncRNA	0.0282	0.0062	-4.56	-3.6825	-0.288082
AC009034	lncRNA	0.3066	0.1575	-2.171	-6.56985	-0.390676
AC009035	lncRNA	0.996	0.964	0.0474	-8.58512	0.0014948
AC009039	lncRNA	0.586	0.307	-1.14	-7.89537	-0.544105
AC009041	lncRNA	0.129	0.0403	-2.76	-5.81542	-0.706194
AC009041	lncRNA	0.827	0.599	0.562	-8.4025	0.183318
AC009041	lncRNA	0.176	0.0588	-2.45	-6.23175	-1.46397
AC009052	lncRNA	0.613	0.367	-0.991	-8.04783	-0.0901187
AC009053	lncRNA	0.71236	0.59	0.5926	-7.72989	0.0931627
AC009053	lncRNA	0.586	0.327	1.09	-7.9499	0.378428
AC009053	lncRNA	0.796	0.634	-0.452	-8.29985	-0.0499235
AC009054	lncRNA	0.923	0.719	-0.381	-8.50065	-0.0447357
AC009055	lncRNA	0.0497	0.0125	-3.83	-4.49286	-0.789087
AC009055	lncRNA	0.7825	0.5685	0.6515	-8.28513	0.0714083
AC009060	lncRNA	0.969	0.8285	-0.2285	-8.55413	-0.00746224
AC009061	lncRNA	0.998	0.988	0.0159	-8.58632	0.0005296
AC009061	lncRNA	0.1053	0.03175	-3.03	-5.47445	-0.281339
AC009063	lncRNA	0.041	0.00982	-4.07	-4.21561	-0.204589
AC009063	lncRNA	0.70275	0.49275	-0.80725	-8.14008	-0.149977
AC009063	lncRNA	0.973	0.84	-0.213	-8.55937	-0.0152311
AC009065	lncRNA	0.0216	0.00445	-4.94	-3.29718	-0.555303
AC009065	lncRNA	0.652	0.41	-0.9	-8.13536	-0.0795914
AC009065	lncRNA	0.898	0.687	-0.427	-8.47865	-0.0189028
AC009065	lncRNA	0.385333	0.171	-0.203333	-7.22723	-0.253491
AC009065	lncRNA	0.419	0.20885	0.49	-7.33619	0.012522
AC009075	lncRNA	0.251	0.0934	2.07	-6.72717	1.21892
AC009081	lncRNA	0.977	0.854	-0.194	-8.56402	-0.00661323
AC009087	lncRNA	0.388	0.168	-1.62	-7.32763	-0.295796
AC009088	lncRNA	0.00298	0.000361	-8.65	-0.33638	-1.16721
AC009088	lncRNA	0.297	0.118	-1.89	-6.96718	-0.958029
AC009090	lncRNA	0.982	0.882	-0.157	-8.57175	-0.0712327
AC009090	lncRNA	0.586	0.311	-1.13	-7.90715	-0.0498161
AC009093	lncRNA	0.593236	0.4395	-2.29286	-6.06545	-0.263526
AC009093	lncRNA	0.97	0.83	-0.227	-8.5557	-0.00732673
AC009093	lncRNA	0.00816367	0.0016906	-14.0667	1.46328	-2.29778	down
AC009093	lncRNA	0.99	0.92	-0.106	-8.5797	-0.00337267
AC009093	lncRNA	0.00262855	0.000375256	-20.39	3.05696	-1.78027
AC009093	lncRNA	0.00929	0.00155	-6.29	-2.05911	-1.24308
AC009095	lncRNA	0.97	0.83	-0.226	-8.55597	-0.00808403
AC009097	lncRNA	0.783	0.549	0.642	-8.3483	0.233994
AC009097	lncRNA	0.000337	1.73e-05	16.3	3.2542	1.35529
AC009097	lncRNA	0.783	0.549	-0.642	-8.34847	-0.304535
AC009097	lncRNA	0.993	0.936	-0.0841	-8.58222	-0.0165879
AC009102	lncRNA	0.546	0.27	-1.24	-7.78047	-0.304288
AC009102	lncRNA	0.601	0.354	1.02	-8.01696	0.503845
AC009107	lncRNA	0.292	0.115	-1.91	-6.94417	-1.27002
AC009107	lncRNA	0.995	0.945	0.0731	-8.58326	0.00233013
AC009108	lncRNA	0.642	0.4	0.921	-8.11579	0.263404
AC009110	lncRNA	0.682	0.442	-0.835	-8.19476	-0.294432
AC009113	lncRNA	0.834	0.606	0.551	-8.40965	0.129139
AC009117	lncRNA	0.392667	0.1965	-1.70667	-7.1762	-0.341055
AC009120	lncRNA	0.307807	0.232	-4.40967	-3.99689	-0.216209
AC009120	lncRNA	0.957	0.779	0.296	-8.53422	0.0095369
AC009120	lncRNA	0.393	0.17	-1.6	-7.34293	-0.402119
AC009121	lncRNA	0.67	0.428	-0.862	-8.17025	-0.0857739
AC009121	lncRNA	0.428	0.2538	1.6665	-7.17197	0.672446
AC009123	lncRNA	0.45965	0.330225	-1.177	-6.97467	-0.213817
AC009127	lncRNA	0.586	0.319	1.11	-7.92702	0.5125
AC009134	lncRNA	0.848	0.622	-0.526	-8.42463	-0.0203267
AC009135	lncRNA	0.969	0.827	-0.231	-8.55463	-0.00737173
AC009137	lncRNA	0.291	0.114	-1.91	-6.93881	-0.606057
AC009139	lncRNA	0.963	0.81	-0.254	-8.54807	-0.0088401
AC009139	lncRNA	0.0953	0.0278	-3.08	-5.4003	-0.61948
AC009142	lncRNA	0.83	0.621	-0.2465	-8.38239	-0.21086
AC009145	lncRNA	0.0109	0.00189	-6.02	-2.29532	-0.446792
AC009145	lncRNA	0.0265	0.00573	-4.65	-3.59194	-1.8659
AC009145	lncRNA	0.996	0.961	-0.0511	-8.5849	-0.0116421
AC009148	lncRNA	0.442	0.2	1.48	-7.50141	0.548299
AC009154	lncRNA	0.47	0.218	-1.41	-7.58324	-0.119439
AC009158	lncRNA	0.426	0.213367	0.506667	-7.40309	0.242799
AC009166	lncRNA	0.978	0.862	0.183	-8.56641	0.00683787
AC009171	lncRNA	0.00796	0.00128	6.57	-1.83105	1.12797
AC009185	lncRNA	0.996	0.954	-0.061	-8.58423	-0.00191433
AC009226	lncRNA	0.68425	0.46425	0.88275	-8.07269	0.177074
AC009227	lncRNA	0.965	0.815	0.246	-8.55028	0.00788687
AC009228	lncRNA	0.43907	0.274311	-2.99233	-5.83276	-0.666771
AC009229	lncRNA	0.255	0.0957	-2.05	-6.75302	-0.772914
AC009229	lncRNA	0.979	0.866	0.177	-8.5677	0.0781846
AC009229	lncRNA	0.0342	0.00787	-4.31	-3.95929	-1.19725
AC009237	lncRNA	0.146	0.0466	-2.64	-5.97746	-0.739162
AC009262	lncRNA	0.977	0.853	-0.195	-8.56362	-0.00621907
AC009264	lncRNA	0.306215	0.181305	3.36	-4.49807	2.16556
AC009269	lncRNA	0.512	0.247	1.31	-7.69703	0.722926
AC009269	lncRNA	0.585	0.304	1.15	-7.88542	0.0961873
AC009269	lncRNA	0.996	0.969	0.0415	-8.58543	0.0014325
AC009271	lncRNA	0.968	0.822	0.237	-8.55295	0.0769524
AC009276	lncRNA	0.791	0.558	-0.628	-8.35875	-0.238177
AC009292	lncRNA	0.00108	9.16e-05	11.5	1.28718	3.74953	up
AC009299	lncRNA	0.788333	0.609	-0.133467	-8.28871	-0.222661
AC009303	lncRNA	0.973	0.841	0.211	-8.55985	0.00755367
AC009303	lncRNA	0.00231	0.000257	-9.3	0.06611	-0.610694
AC009305	lncRNA	0.284	0.11	1.94	-6.90195	0.262303
AC009312	lncRNA	0.806	0.574	0.601	-8.37712	0.0223271
AC009313	lncRNA	0.0846	0.024	-3.21	-5.23644	-0.351107
AC009318	lncRNA	0.000774	5.73e-05	12.7	1.84298	0.98659
AC009320	lncRNA	0.953	0.766	-0.314	-8.52768	-0.0114641
AC009365	lncRNA	0.992	0.931	-0.091	-8.58149	-0.00495457
AC009365	lncRNA	0.806	0.575	0.6	-8.37761	0.559177
AC009387	lncRNA	0.586	0.319	-1.11	-7.92903	-0.131481
AC009396	lncRNA	0.67	0.429	-0.862	-8.17057	-0.45156
AC009396	lncRNA	0.586	0.307	-1.14	-7.89581	-0.170485
AC009396	lncRNA	0.603	0.357	1.02	-8.02292	0.101037
AC009404	lncRNA	0.2718	0.180603	3.06233	-4.99922	0.11634
AC009407	lncRNA	0.217	0.0764	-2.23	-6.51451	-0.527546
AC009411	lncRNA	0.6735	0.4675	-0.641	-7.93907	-0.337963
AC009411	lncRNA	0.586	0.31	1.13	-7.90291	0.123805
AC009414	lncRNA	0.00506	0.000721	-7.45	-1.15696	-0.528238
AC009432	lncRNA	0.997	0.98	0.0262	-8.58606	0.00083077
AC009432	lncRNA	0.023305	0.0054825	6.305	-2.3283	0.624256
AC009435	lncRNA	0.992	0.93	-0.0923	-8.58135	-0.00320883
AC009446	lncRNA	0.707	0.469	-0.785	-8.23781	-0.350036
AC009468	lncRNA	0.0219	0.00452	-4.92	-3.31526	-0.941697
AC009468	lncRNA	0.444	0.202	-1.47	-7.50767	-0.26325
AC009478	lncRNA	0.986	0.902	-0.129	-8.57645	-0.0040878
AC009480	lncRNA	0.836	0.609	-0.546	-8.41232	-0.0834891
AC009486	lncRNA	0.991	0.924	0.101	-8.58038	0.0032864
AC009487	lncRNA	0.6645	0.5045	-0.7685	-7.88126	-0.185242
AC009487	lncRNA	0.972	0.837	-0.217	-8.55823	-0.00703297
AC009495	lncRNA	0.00678	0.00104	6.87	-1.59192	0.87514
AC009495	lncRNA	0.994	0.938	0.0817	-8.58246	0.0172968
AC009495	lncRNA	0.498	0.237	-1.34	-7.66061	-0.283302
AC009498	lncRNA	0.964	0.812	0.251	-8.54871	0.0289406
AC009502	lncRNA	0.795	0.598	-0.604	-8.3124	-0.206332
AC009505	lncRNA	0.564	0.2865	-1.195	-7.83047	-0.121384
AC009506	lncRNA	0.0157	0.00296	-5.43	-2.82141	-0.451256
AC009509	lncRNA	0.955	0.773	0.3045	-8.53115	0.117164
AC009509	lncRNA	0.991	0.924	-0.0999	-8.58048	-0.0503224
AC009511	lncRNA	0.932	0.732	-0.363	-8.50842	-0.0119048
AC009518	lncRNA	0.50075	0.45435	-2.837	-5.64489	-0.325558
AC009531	lncRNA	0.292	0.115	1.91	-6.94132	0.313202
AC009542	lncRNA	0.251	0.0937	-2.07	-6.73023	-0.396169
AC009549	lncRNA	0.0411	0.00987	-4.07	-4.22206	-0.448923
AC009554	lncRNA	0.997	0.978	0.0293	-8.58595	0.0031409
AC009558	lncRNA	0.588	0.332	-1.07	-7.9634	-0.492853
AC009558	lncRNA	0.947	0.754	0.331	-8.52135	0.133204
AC009562	lncRNA	0.9785	0.874	0.1678	-8.5646	0.00541872
AC009563	lncRNA	0.6702	0.5841	1.299	-7.25858	0.2232
AC009567	lncRNA	0.644	0.402	-0.917	-8.1202	-0.391667
AC009597	lncRNA	0.299	0.118	-1.89	-6.97411	-0.517117
AC009623	lncRNA	0.702	0.463	-0.794	-8.22973	-0.066465
AC009623	lncRNA	0.983	0.888	-0.148	-8.5734	-0.00479213
AC009630	lncRNA	0.245	0.0908	2.1	-6.69709	0.941739
AC009630	lncRNA	0.00041015	2.92965e-05	22.55	4.4903	2.40773	up
AC009630	lncRNA	0.61	0.365	-0.998	-8.04128	-0.322795
AC009646	lncRNA	0.409	0.20295	-0.53	-7.27444	-0.286601
AC009652	lncRNA	0.666	0.479	-0.964	-7.90515	-0.380142
AC009652	lncRNA	0.977	0.853	0.195	-8.56362	0.00611767
AC009654	lncRNA	0.671	0.43	-0.859	-8.17291	-0.132639
AC009656	lncRNA	0.0654	0.0175	-3.5	-4.88086	-0.912531
AC009686	lncRNA	0.774	0.54	0.658	-8.33696	0.324517
AC009704	lncRNA	0.586	0.317	-1.11	-7.92215	-0.292887
AC009716	lncRNA	0.478	0.223	-1.39	-7.60466	-0.923591
AC009720	lncRNA	0.85	0.624	-0.522	-8.42685	-0.262264
AC009743	lncRNA	0.985	0.894	-0.14	-8.57469	-0.00479113
AC009754	lncRNA	0.991	0.925	-0.0992	-8.58056	-0.0031616
AC009779	lncRNA	0.378	0.162	-1.64	-7.29306	-0.113871
AC009779	lncRNA	0.96	0.797	-0.271	-8.54251	-0.00897963
AC009803	lncRNA	0.822	0.643	-0.527	-8.36502	-0.0196608
AC009803	lncRNA	0.997	0.979	-0.0277	-8.58601	-0.014518
AC009803	lncRNA	0.00107	9.04e-05	-11.6	1.30252	-0.970217
AC009804	lncRNA	0.0184	0.00363	-5.18	-3.0599	-1.06138
AC009806	lncRNA	0.585	0.304	1.15	-7.88672	0.616427
AC009812	lncRNA	0.295	0.117	-1.9	-6.95897	-0.954733
AC009812	lncRNA	7.04e-05	1.5e-06	-26.8	6.10054	-1.57991
AC009831	lncRNA	0.0599	0.0157	-3.61	-4.7555	-0.666315
AC009831	lncRNA	0.5072	0.41675	-1.8415	-6.47354	-0.726995
AC009852	lncRNA	0.586	0.314	1.12	-7.91387	1.28852
AC009869	lncRNA	0.759	0.591333	0.00646667	-8.26854	0.0325468
AC009884	lncRNA	0.586	0.319	-1.11	-7.92857	-0.315871
AC009902	lncRNA	0.0131	0.00238	-5.71	-2.56606	-0.837426
AC009908	lncRNA	0.229	0.0824	-2.17	-6.59473	-0.358635
AC009930	lncRNA	0.037	0.00867	-4.2	-4.07214	-0.812192
AC009948	lncRNA	0.564271	0.381823	1.24114	-7.34348	0.0961549
AC009950	lncRNA	0.328	0.1809	-1.28	-6.37819	-0.258615
AC009955	lncRNA	0.376	0.161	-1.65	-7.28617	-0.455089
AC009962	lncRNA	0.0635	0.0169	-3.54	-4.83841	-0.540079
AC009965	lncRNA	0.985	0.894	0.141	-8.5746	0.0431394
AC009970	lncRNA	0.836	0.608	-0.547	-8.4119	-0.358242
AC009987	lncRNA	0.429	0.192	-1.51	-7.46079	-0.473068
AC009988	lncRNA	0.000129	3.91e-06	22.1	4.99658	2.08428	up
AC009996	lncRNA	0.00155	0.000151	10.4	0.69782	0.899014
AC010082	lncRNA	0.984	0.891	0.144	-8.57398	0.0044564
AC010096	lncRNA	0.996	0.976	-0.0314	-8.58588	-0.00098473
AC010099	lncRNA	0.998	0.985	0.0196	-8.58624	0.00061527
AC010105	lncRNA	0.96	0.794	-0.275	-8.54135	-0.00927083
AC010127	lncRNA	0.404442	0.288535	5.802	-3.37973	0.972251
AC010136	lncRNA	0.591	0.338	-1.06	-7.97821	-0.31382
AC010139	lncRNA	0.694	0.455	-0.811	-8.21542	-0.0275866
AC010145	lncRNA	0.0278	0.0061	-4.58	-3.66421	-0.527599
AC010148	lncRNA	0.451761	0.30475	8.141	-4.05699	1.10242
AC010149	lncRNA	0.5074	0.39885	-1.69	-6.60806	-0.467264
AC010157	lncRNA	0.319	0.129	-1.82	-7.0643	-0.448175
AC010163	lncRNA	0.334	0.137	-1.77	-7.12533	-0.345849
AC010163	lncRNA	0.872	0.654	0.477	-8.45265	0.180835
AC010168	lncRNA	0.000321	1.59e-05	16.6	3.35554	2.96971	up
AC010168	lncRNA	0.0364	0.00849	-4.22	-4.04806	-0.353156
AC010173	lncRNA	0.526	0.257	1.28	-7.73405	0.401806
AC010177	lncRNA	1	0.998	-0.00288	-8.58646	-8.993e-05
AC010181	lncRNA	0.197937	0.0781113	-4.19667	-4.71838	-0.441269
AC010181	lncRNA	0.75	0.514	-0.702	-8.30422	-0.0964656
AC010183	lncRNA	0.951	0.763	0.319	-8.52609	0.0103048
AC010183	lncRNA	0.7585	0.524	0.686	-8.31638	0.153213
AC010185	lncRNA	0.000882	6.88e-05	12.3	1.62579	2.35189	up
AC010186	lncRNA	0.587	0.331	1.08	-7.95995	0.282834
AC010186	lncRNA	0.743	0.507	-0.715	-8.29412	-0.407322
AC010186	lncRNA	0.1	0.0295	3.03	-5.47042	0.292659
AC010198	lncRNA	0.672	0.432	-0.855	-8.17656	-0.440235
AC010203	lncRNA	0.55332	0.40966	-0.8522	-7.29074	-0.116499
AC010203	lncRNA	0.964	0.812	-0.251	-8.54895	-0.0462504
AC010207	lncRNA	0.000666	4.62e-05	-13.3	2.09831	-1.53116
AC010210	lncRNA	0.559625	0.410917	-1.8175	-6.94119	-0.413412
AC010226	lncRNA	0.193607	0.075729	-3.31333	-4.47323	-0.330812
AC010230	lncRNA	0.9665	0.8375	-0.2183	-8.54834	-0.00717625
AC010235	lncRNA	0.928	0.727	-0.37	-8.50524	-0.0116238
AC010245	lncRNA	0.651	0.409	-0.902	-8.13413	-0.149416
AC010247	lncRNA	0.49903	0.473187	-4.2541	-4.48178	-0.529211
AC010247	lncRNA	0.00509	0.000726	-7.44	-1.16557	-1.3332
AC010260	lncRNA	0.114	0.0345	-2.89	-5.64424	-0.890145
AC010261	lncRNA	0.594	0.343	-1.05	-7.98961	-0.204271
AC010261	lncRNA	0.647833	0.490833	-1.059	-7.46429	-0.256498
AC010266	lncRNA	0.668	0.427	-0.865	-8.16757	-0.462422
AC010266	lncRNA	0.992	0.929	0.0937	-8.5812	0.00293517
AC010267	lncRNA	0.999	0.995	-0.00602	-8.58645	-0.00019603
AC010273	lncRNA	0.589	0.335	1.07	-7.96977	0.527731
AC010273	lncRNA	0.852	0.627	0.518	-8.42964	0.148347
AC010275	lncRNA	0.000678	4.75e-05	13.2	2.06463	5.39771	up
AC010280	lncRNA	0.0216	0.00445	4.94	-3.29772	0.879612
AC010280	lncRNA	0.00281	0.000334	-8.79	-0.2451	-0.739272
AC010280	lncRNA	0.704	0.465	-0.791	-8.23269	-0.0295093
AC010285	lncRNA	0.00419	0.000565	-7.85	-0.86849	-0.946394
AC010300	lncRNA	0.6865	0.5575	-0.85555	-7.93683	-0.372965
AC010307	lncRNA	0.4565	0.251	1.457	-7.47653	0.444386
AC010307	lncRNA	0.6495	0.4965	-0.996	-7.82058	-0.132877
AC010307	lncRNA	0.7245	0.487	0.775	-8.21692	0.0378962
AC010320	lncRNA	0.169	0.0559	2.49	-6.17536	1.55078
AC010329	lncRNA	0.863	0.642	-0.495	-8.44261	-0.0156609
AC010333	lncRNA	0.64	0.397	-0.926	-8.1113	-0.226337
AC010333	lncRNA	0.5	0.238	-1.34	-7.66524	-0.34761
AC010336	lncRNA	0.155	0.0503	2.57	-6.06124	0.647466
AC010343	lncRNA	0.414	0.214	1.60033	-7.30511	0.687117
AC010359	lncRNA	0.349	0.145	-1.73	-7.18469	-0.468755
AC010387	lncRNA	0.996	0.976	-0.0323	-8.58584	-0.00666573
AC010395	lncRNA	0.499	0.238	1.34	-7.66297	0.660747
AC010401	lncRNA	0.685	0.5465	-0.77445	-7.93752	-0.351005
AC010401	lncRNA	0.199	0.0684	2.32	-6.39559	0.551965
AC010406	lncRNA	0.976	0.851	0.198	-8.56308	0.0878917
AC010420	lncRNA	0.732	0.495	-0.737	-8.27682	-0.0244216
AC010425	lncRNA	0.586	0.309	-1.13	-7.89949	-0.520589
AC010445	lncRNA	0.591	0.339	-1.06	-7.97936	-0.158457
AC010451	lncRNA	0.121	0.0371	-2.83	-5.72378	-0.682069
AC010451	lncRNA	0.9765	0.8515	-0.197	-8.5632	-0.0562968
AC010451	lncRNA	0.961	0.801	0.266	-8.54414	0.00849993
AC010457	lncRNA	0.475648	0.380507	-8.3395	-2.5113	-1.06253
AC010468	lncRNA	0.0153	0.00288	5.47	-2.7894	1.11502
AC010478	lncRNA	0.531133	0.3776	1.75167	-6.9724	0.456263
AC010485	lncRNA	0.2735	0.10595	0.225	-6.81571	0.257157
AC010486	lncRNA	0.194	0.0663	2.35	-6.36161	0.768019
AC010486	lncRNA	0.906	0.696	-0.414	-8.48535	-0.055357
AC010486	lncRNA	0.988	0.91	-0.119	-8.57804	-0.00379213
AC010491	lncRNA	0.0176367	0.00384837	8.77	-1.19603	1.17317
AC010528	lncRNA	0.609	0.363	-1	-8.03699	-0.21716
AC010536	lncRNA	0.996	0.97	-0.0397	-8.58552	-0.00126297
AC010551	lncRNA	0.106	0.03165	-2.97	-5.547	-0.577899
AC010551	lncRNA	0.586	0.317	-1.11	-7.92234	-0.0688321
AC010551	lncRNA	0.98	0.871	-0.171	-8.56888	-0.00553513
AC010595	lncRNA	2.48e-05	2.44e-07	38.8	8.13126	2.92234	up
AC010601	lncRNA	0.8565	0.636	0.089	-8.43233	0.117886
AC010608	lncRNA	0.996	0.968	-0.0428	-8.58537	-0.00148973
AC010609	lncRNA	0.545	0.269	1.24	-7.77732	0.394188
AC010624	lncRNA	0.000997	8.19e-05	-11.8	1.41945	-2.66723	down
AC010634	lncRNA	0.941	0.744	-0.345	-8.51574	-0.0114452
AC010638	lncRNA	0.719	0.5755	-0.7077	-8.04248	-0.27124
AC010655	lncRNA	0.00262	0.000305	8.96	-0.13835	1.57678
AC010677	lncRNA	0.996	0.959	0.0545	-8.58468	0.0107403
AC010723	lncRNA	0.961	0.803	-0.263	-8.54511	-0.0086461
AC010729	lncRNA	1	0.997	-0.0037	-8.58646	-0.00011947
AC010731	lncRNA	0.986	0.903	-0.128	-8.57666	-0.00422423
AC010731	lncRNA	0.959	0.791	0.28	-8.53971	0.009465
AC010735	lncRNA	0.537	0.264	1.26	-7.76034	0.126318
AC010737	lncRNA	0.998	0.99	-0.0129	-8.58637	-0.00041803
AC010745	lncRNA	0.501	0.239	1.34	-7.66798	0.443846
AC010745	lncRNA	0.988	0.908	-0.121	-8.57768	-0.00382587
AC010745	lncRNA	0.982	0.879	0.16	-8.57104	0.00598093
AC010745	lncRNA	0.149	0.0478	-2.62	-6.00493	-1.00965
AC010746	lncRNA	0.99	0.921	-0.105	-8.57987	-0.00329843
AC010754	lncRNA	0.672	0.431	0.857	-8.17506	0.038659
AC010760	lncRNA	0.961	0.8	0.267	-8.544	0.0616485
AC010761	lncRNA	0.143	0.0457	-2.65	-5.95515	-1.16017
AC010761	lncRNA	0.36055	0.231925	2.821	-5.80994	0.326787
AC010761	lncRNA	0.961	0.801	0.266	-8.54437	0.00857397
AC010761	lncRNA	0.367	0.156	-1.67	-7.25424	-0.650381
AC010761	lncRNA	0.566	0.285	-1.2	-7.8301	-0.118327
AC010768	lncRNA	0.637	0.393	-0.935	-8.10256	-0.166084
AC010768	lncRNA	0.585	0.304	-1.15	-7.88465	-0.278199
AC010768	lncRNA	0.616	0.372	0.982	-8.05699	0.0418425
AC010789	lncRNA	6.37e-05	1.29e-06	27.7	6.27422	2.61922	up
AC010809	lncRNA	0.955	0.772	0.306	-8.53083	0.0409878
AC010809	lncRNA	0.211	0.0739	2.26	-6.47876	0.465755
AC010834	lncRNA	0.744	0.508	-0.714	-8.29495	-0.264352
AC010834	lncRNA	0.0302	0.00673	4.47	-3.77882	1.60456
AC010834	lncRNA	0.962	0.807	0.258	-8.54683	0.103593
AC010880	lncRNA	0.6855	0.446	0.0125	-8.20111	0.102945
AC010883	lncRNA	0.627	0.383	-0.958	-8.08097	-0.108455
AC010884	lncRNA	0.926	0.724	0.374	-8.50352	0.0897196
AC010889	lncRNA	0.0484	0.0121	-3.86	-4.45688	-0.516338
AC010890	lncRNA	0.653	0.488667	-0.881467	-7.9319	-0.350983
AC010891	lncRNA	0.996	0.96	-0.0522	-8.58484	-0.0151311
AC010894	lncRNA	0.068745	0.0214215	6.605	-2.5614	0.649965
AC010894	lncRNA	0.350517	0.231	17.8985	-0.32725	0.991508
AC010894	lncRNA	0.614	0.368	0.989	-8.04988	0.540006
AC010907	lncRNA	0.794	0.562	-0.621	-8.363	-0.020049
AC010907	lncRNA	0.682	0.443	-0.834	-8.1953	-0.0520503
AC010931	lncRNA	0.21	0.0732	2.27	-6.4686	0.595998
AC010967	lncRNA	0.9905	0.931	-0.09075	-8.57998	-0.0029079
AC010967	lncRNA	0.867	0.647	-0.487	-8.44723	-0.0165877
AC010969	lncRNA	0.617	0.373	-0.98	-8.05897	-0.0353769
AC010969	lncRNA	0.44	0.199	-1.48	-7.49272	-0.352919
AC010973	lncRNA	0.586	0.316	-1.12	-7.91894	-0.0961313
AC010973	lncRNA	0.859	0.636	-0.504	-8.43783	-0.236912
AC010974	lncRNA	0.158	0.0516	2.55	-6.08815	0.476008
AC010975	lncRNA	0.987	0.907	0.123	-8.57737	0.00416437
AC010976	lncRNA	0.985	0.893	-0.141	-8.57451	-0.133352
AC010978	lncRNA	0.00404	0.000538	7.94	-0.81098	2.65974	up
AC010980	lncRNA	0.325001	0.277286	10.1485	-1.402	1.62003
AC010982	lncRNA	0.996	0.964	-0.048	-8.58508	-0.00150223
AC010983	lncRNA	0.802	0.57	0.608	-8.37203	0.0385177
AC010997	lncRNA	0.988	0.91	-0.119	-8.57802	-0.0855058
AC010998	lncRNA	0.996	0.976	-0.0318	-8.58586	-0.00653733
AC011008	lncRNA	0.301	0.12	1.88	-6.9844	1.07162
AC011008	lncRNA	0.26773	0.143146	-4.266	-4.74443	-0.234867
AC011092	lncRNA	0.996	0.968	0.0417	-8.58542	0.00130627
AC011095	lncRNA	0.591667	0.355667	-1.075	-7.92893	-0.282016
AC011120	lncRNA	0.598	0.349	-1.03	-8.00565	-0.557258
AC011124	lncRNA	0.837667	0.6665	-0.124333	-8.36521	-0.030758
AC011124	lncRNA	0.856667	0.703	-0.428767	-8.42011	-0.104668
AC011131	lncRNA	0.627	0.383	-0.956	-8.08244	-0.524603
AC011139	lncRNA	0.969	0.826	-0.232	-8.5543	-0.0107596
AC011193	lncRNA	0.7715	0.547	-0.6765	-8.28562	-0.0697509
AC011196	lncRNA	0.301	0.12	-1.88	-6.98678	-0.488404
AC011228	lncRNA	0.412	0.182	1.55	-7.40611	0.812535
AC011243	lncRNA	0.987	0.904	0.126	-8.57689	0.00426217
AC011247	lncRNA	0.7372	0.5528	-0.614024	-8.15749	-0.136133
AC011247	lncRNA	0.0336	0.00768	-4.33	-3.93228	-0.38208
AC011257	lncRNA	0.219	0.0776	-2.22	-6.52994	-0.232788
AC011284	lncRNA	0.744	0.508	-0.713	-8.29569	-0.0235664
AC011287	lncRNA	0.336286	0.254139	18.0143	-1.2331	1.0173
AC011287	lncRNA	0.664	0.423	0.873	-8.16026	0.180341
AC011290	lncRNA	0.588	0.332	-1.07	-7.9635	-0.25182
AC011333	lncRNA	0.979	0.869	-0.174	-8.56838	-0.00613907
AC011352	lncRNA	0.767	0.532	-0.672	-8.32694	-0.107581
AC011362	lncRNA	0.987	0.906	0.124	-8.5773	0.00430007
AC011363	lncRNA	0.926	0.724	-0.374	-8.50364	-0.128337
AC011365	lncRNA	0.5409	0.4872	-1.56685	-6.91987	-0.194798
AC011365	lncRNA	0.322	0.131	-1.81	-7.078	-0.690443
AC011369	lncRNA	0.971	0.834	-0.22	-8.5574	-0.0125417
AC011374	lncRNA	0.996	0.968	0.0416	-8.58543	0.0064519
AC011377	lncRNA	0.502	0.24	1.34	-7.67035	0.558377
AC011379	lncRNA	0.923	0.719	-0.381	-8.50069	-0.144042
AC011379	lncRNA	0.023695	0.005662	-6.755	-2.0672	-0.976927
AC011383	lncRNA	0.605	0.359	1.01	-8.02851	1.01504
AC011389	lncRNA	0.51412	0.377275	-1.8347	-6.56326	-0.404686
AC011389	lncRNA	0.696	0.457	-0.806	-8.21936	-0.0425325
AC011396	lncRNA	0.997	0.98	0.0267	-8.58604	0.00084003
AC011396	lncRNA	0.984	0.891	-0.1445	-8.5738	-0.0190563
AC011396	lncRNA	0.715	0.477	0.769	-8.25082	0.0308072
AC011405	lncRNA	0.79175	0.66025	0.618325	-8.17287	0.112992
AC011416	lncRNA	0.586667	0.348333	-0.0246667	-7.85968	-0.105466
AC011444	lncRNA	0.997	0.979	-0.0275	-8.58601	-0.0008607
AC011447	lncRNA	0.985	0.893	0.141	-8.57451	0.0117905
AC011447	lncRNA	0.658	0.416	-0.888	-8.14726	-0.0773743
AC011447	lncRNA	0.323	0.131	-1.81	-7.08068	-0.445872
AC011451	lncRNA	0.783	0.55	0.642	-8.34883	0.174615
AC011467	lncRNA	0.682	0.443	-0.834	-8.19519	-0.187215
AC011468	lncRNA	0.252	0.0939	-2.07	-6.73235	-0.225851
AC011472	lncRNA	0.413	0.182	-1.55	-7.40779	-0.623965
AC011474	lncRNA	0.9795	0.894	0.14195	-8.5648	0.00446395
AC011474	lncRNA	0.996	0.969	0.0406	-8.58548	0.00133913
AC011474	lncRNA	0.281	0.109	-1.95	-6.88835	-0.950735
AC011491	lncRNA	0.4295	0.194	0.145	-7.45112	-0.0387074
AC011503	lncRNA	0.295225	0.161306	-3.305	-4.4516	-0.677584
AC011509	lncRNA	0.951	0.763	0.319	-8.52613	0.127557
AC011518	lncRNA	0.875	0.658	-0.471	-8.45611	-0.163061
AC011523	lncRNA	0.771333	0.609333	0.402	-8.1284	0.0322939
AC011525	lncRNA	0.625	0.38	-0.963	-8.07613	-0.31517
AC011525	lncRNA	0.868	0.648	0.485	-8.44841	0.0156189
AC011586	lncRNA	0.991	0.925	0.099	-8.58058	0.0490434
AC011586	lncRNA	0.28398	0.142179	-4.935	-4.07574	-1.10393
AC011595	lncRNA	0.586	0.312	-1.12	-7.91008	-0.419665
AC011595	lncRNA	0.996	0.955	0.0597	-8.58433	0.001858
AC011601	lncRNA	0.183	0.0617	-2.41	-6.28446	-0.542222
AC011603	lncRNA	0.5198	0.41865	-1.5635	-6.79784	-0.10952
AC011603	lncRNA	0.251324	0.117238	-3.25	-5.4311	-0.523156
AC011603	lncRNA	0.954	0.77	-0.309	-8.52965	-0.0507433
AC011611	lncRNA	0.00138	0.000128	10.8	0.88792	0.692239
AC011611	lncRNA	0.995	0.945	0.0724	-8.58332	0.0163643
AC011611	lncRNA	0.97	0.83	-0.226	-8.5559	-0.0074001
AC011625	lncRNA	0.808	0.578	-0.596	-8.38047	-0.1178
AC011632	lncRNA	0.0825683	0.0290767	26.2967	0.597377	1.54887
AC011632	lncRNA	0.662	0.42	-0.878	-8.15587	-0.26072
AC011676	lncRNA	0.0258	0.00556	4.68	-3.5574	1.57824
AC011676	lncRNA	0.0833	0.0236	-3.23	-5.21634	-0.871572
AC011676	lncRNA	0.993	0.935	0.0855	-8.58208	0.0026942
AC011726	lncRNA	0.649	0.407	0.905	-8.13097	0.253178
AC011726	lncRNA	0.996	0.973	0.0358	-8.5857	0.001213
AC011731	lncRNA	0.016	0.00305	5.4	-2.85492	0.750322
AC011747	lncRNA	0.953	0.768	-0.312	-8.52847	-0.0125069
AC011752	lncRNA	0.508	0.331867	-1.79933	-6.95771	-0.423586
AC011753	lncRNA	0.978	0.863	-0.181	-8.56677	-0.0975156
AC011754	lncRNA	0.586	0.322	-1.1	-7.93671	-0.112476
AC011773	lncRNA	0.586	0.312	1.13	-7.90917	0.283911
AC011773	lncRNA	0.48485	0.395925	2.8845	-5.40346	0.46942
AC011824	lncRNA	0.962	0.807	0.257	-8.54692	0.00820233
AC011824	lncRNA	0.725	0.52	-0.654667	-8.17567	-0.34635
AC011824	lncRNA	0.996	0.951	-0.0651	-8.58392	-0.00211797
AC011825	lncRNA	0.298	0.118	-1.89	-6.97198	-0.538357
AC011825	lncRNA	0.0319	0.00723	-4.4	-3.86116	-1.31772
AC011840	lncRNA	0.638	0.394	-0.932	-8.10525	-0.0321747
AC011840	lncRNA	0.497	0.236	-1.35	-7.6576	-0.326992
AC011840	lncRNA	0.0192	0.00383	-5.12	-3.12275	-0.739925
AC011840	lncRNA	0.962	0.805	0.26	-8.54614	0.149882
AC011853	lncRNA	0.587	0.33	1.08	-7.95667	0.255503
AC011891	lncRNA	0.00178	0.00018	-10	0.48556	-2.3384	down
AC011893	lncRNA	0.649	0.407	-0.905	-8.13073	-0.031685
AC011897	lncRNA	0.7725	0.558	0.4105	-8.24074	-0.000313235
AC011899	lncRNA	0.344	0.143	-1.74	-7.1688	-0.568353
AC011899	lncRNA	0.53425	0.35055	-1.285	-7.58457	-0.449965
AC011900	lncRNA	0.959	0.791	-0.279	-8.53994	-0.15314
AC011921	lncRNA	0.609	0.39	-0.907333	-7.79901	-0.0764797
AC011933	lncRNA	0.4175	0.21905	-1.585	-7.32188	-0.300576
AC011933	lncRNA	0.583	0.301	1.16	-7.87655	0.23186
AC011939	lncRNA	0.999	0.996	0.00592	-8.58645	0.00021227
AC011944	lncRNA	0.159	0.0519	2.55	-6.0959	0.832437
AC011978	lncRNA	2.99e-05	3.36e-07	-36.4	7.78272	-1.79799
AC011995	lncRNA	0.278	0.108	-1.96	-6.87634	-0.22411
AC011995	lncRNA	0.962	0.807	0.258	-8.54675	0.0383885
AC011998	lncRNA	0.992	0.931	-0.091	-8.5815	-0.00291943
AC012038	lncRNA	0.68	0.44	-0.839	-8.191	-0.448034
AC012038	lncRNA	0.255	0.0956	2.06	-6.75185	0.58879
AC012050	lncRNA	0.643	0.401	-0.919	-8.11764	-0.619406
AC012055	lncRNA	0.573	0.291	-1.18	-7.84748	-0.249043
AC012055	lncRNA	0.234	0.0852	-2.15	-6.6299	-0.41458
AC012065	lncRNA	0.629	0.385	0.953	-8.08535	0.164141
AC012070	lncRNA	0.898	0.687	0.428	-8.47843	0.0822645
AC012074	lncRNA	0.268	0.102	-2	-6.82458	-0.282826
AC012081	lncRNA	0.97	0.83	0.226	-8.55603	0.00732487
AC012085	lncRNA	0.5245	0.4234	-1.5125	-6.86481	-0.196489
AC012100	lncRNA	0.996	0.967	-0.0431	-8.58535	-0.00156923
AC012103	lncRNA	0.00179	0.000181	-10	0.47946	-2.84734	down
AC012146	lncRNA	0.302933	0.219847	0.293333	-4.87494	0.0437586
AC012146	lncRNA	0.978	0.86	0.186	-8.56581	0.00574257
AC012150	lncRNA	0.991	0.923	-0.101	-8.5803	-0.00333417
AC012157	lncRNA	0.587	0.331	1.08	-7.95994	0.38657
AC012170	lncRNA	0.531	0.26	1.27	-7.74555	0.331347
AC012170	lncRNA	0.959	0.791	0.279	-8.53991	0.0453978
AC012174	lncRNA	0.273	0.105	1.98	-6.84938	0.180245
AC012181	lncRNA	0.0218	0.0045	-4.93	-3.31132	-0.531744
AC012181	lncRNA	0.0182	0.0036	-5.19	-3.05052	-0.831365
AC012186	lncRNA	0.978	0.861	0.184	-8.56611	0.00594273
AC012229	lncRNA	0.979	0.865	-0.179	-8.56729	-0.00586393
AC012291	lncRNA	0.455	0.209	-1.45	-7.53914	-0.148786
AC012307	lncRNA	0.00871	0.00143	-6.4	-1.96695	-0.540571
AC012312	lncRNA	0.0176	0.00344	-5.25	-2.99561	-0.371018
AC012313	lncRNA	0.832	0.7	-0.41405	-8.37701	-0.209552
AC012317	lncRNA	0.953	0.767	-0.313	-8.52802	-0.0297393
AC012322	lncRNA	0.833	0.605	-0.552	-8.40874	-0.0505134
AC012339	lncRNA	0.971	0.834	-0.221	-8.55723	-0.00724757
AC012349	lncRNA	0.986	0.9	-0.1324	-8.57467	-0.00424317
AC012354	lncRNA	0.000113	3.07e-06	23.2	5.27661	2.25793	up
AC012355	lncRNA	0.887	0.673	-0.448	-8.468	-0.0150099
AC012358	lncRNA	0.586	0.318	1.11	-7.92485	0.070503
AC012358	lncRNA	0.996	0.955	0.0599	-8.58431	0.0018656
AC012360	lncRNA	0.727	0.49	0.745	-8.27026	0.0788654
AC012360	lncRNA	0.636	0.5385	1.0046	-7.72631	0.313544
AC012361	lncRNA	0.997	0.977	0.0307	-8.5859	0.00103033
AC012363	lncRNA	0.956	0.776	0.3	-8.53272	0.00972647
AC012363	lncRNA	0.998	0.988	-0.0152	-8.58633	-0.00047653
AC012368	lncRNA	0.57725	0.384467	0.400167	-7.56961	0.0900335
AC012368	lncRNA	0.00244	0.000276	9.16	-0.01911	1.55324
AC012370	lncRNA	0.586	0.319	1.11	-7.92783	0.556528
AC012370	lncRNA	0.21485	0.09299	-3.485	-5.12003	-0.610675
AC012377	lncRNA	0.388	0.168	1.61	-7.32813	0.265291
AC012378	lncRNA	0.208	0.0726	-2.27	-6.45861	-0.554206
AC012379	lncRNA	0.81	0.579	0.593	-8.3826	0.262574
AC012379	lncRNA	0.951	0.761	-0.321	-8.52514	-0.226632
AC012404	lncRNA	0.978	0.86	-0.186	-8.56568	-0.00663463
AC012404	lncRNA	0.996	0.948	-0.0689	-8.58362	-0.00224587
AC012409	lncRNA	0.418	0.19855	-1.61	-7.30962	-0.625762
AC012409	lncRNA	0.996	0.957	-0.0565	-8.58455	-0.0018217
AC012413	lncRNA	0.96	0.794	-0.276	-8.54118	-0.00891747
AC012414	lncRNA	0.586	0.319	-1.11	-7.92801	-0.691904
AC012417	lncRNA	0.963	0.81	0.254	-8.54803	0.00795213
AC012435	lncRNA	0.483795	0.4015	3.5975	-5.04553	0.964179
AC012435	lncRNA	0.0498	0.0126	3.83	-4.49806	1.23043
AC012442	lncRNA	0.274	0.105	1.98	-6.85422	0.423202
AC012445	lncRNA	0.912	0.704	-0.402	-8.49069	-0.0135636
AC012447	lncRNA	0.33	0.135	1.78	-7.11163	0.817837
AC012451	lncRNA	0.957	0.778	0.297	-8.53377	0.00977153
AC012456	lncRNA	0.811	0.58	-0.592	-8.38319	-0.107817
AC012456	lncRNA	0.756	0.521	0.69	-8.31311	0.256274
AC012462	lncRNA	0.998	0.984	0.0211	-8.5862	0.00235413
AC012462	lncRNA	0.996	0.955	0.0591	-8.58437	0.0192627
AC012462	lncRNA	0.996	0.97	0.0401	-8.5855	0.00881163
AC012464	lncRNA	0.459	0.211	-1.43	-7.55217	-0.572809
AC012464	lncRNA	0.861	0.639	-0.5	-8.43992	-0.159
AC012485	lncRNA	0.5081	0.37385	-1.749	-6.92827	-0.511005
AC012485	lncRNA	0.586	0.313	1.12	-7.91273	0.296853
AC012494	lncRNA	0.972	0.839	0.214	-8.55896	0.0188446
AC012499	lncRNA	0.586	0.3205	-1.105	-7.93182	-0.248157
AC012501	lncRNA	0.625667	0.440667	0.264	-7.83824	0.355975
AC012506	lncRNA	0.352	0.147	-1.72	-7.19844	-0.286086
AC012506	lncRNA	0.724	0.486	-0.752	-8.26486	-0.0271091
AC012506	lncRNA	0.825	0.596	-0.567	-8.39957	-0.25509
AC012506	lncRNA	0.7735	0.557	0.6945	-8.23051	0.133381
AC012507	lncRNA	0.609	0.363	-1	-8.03845	-0.0346272
AC012507	lncRNA	0.537125	0.37752	-0.538	-7.03049	-0.0532927
AC012508	lncRNA	0.748	0.512	-0.707	-8.30072	-0.198267
AC012508	lncRNA	0.604	0.358	-1.01	-8.02549	-0.249997
AC012513	lncRNA	0.541	0.267	-1.25	-7.76845	-0.199418
AC012555	lncRNA	0.59	0.337	1.06	-7.97488	0.23415
AC012558	lncRNA	0.651	0.409	-0.901	-8.13436	-0.0303388
AC012560	lncRNA	0.40285	0.278605	2.1865	-5.79244	0.598848
AC012572	lncRNA	0.226	0.0809	2.19	-6.57503	0.666902
AC012574	lncRNA	0.971	0.834	0.221	-8.55732	0.00688773
AC012574	lncRNA	0.0283	0.00622	-4.56	-3.68769	-0.512293
AC012588	lncRNA	0.594	0.343	1.05	-7.99115	0.462038
AC012593	lncRNA	0.969	0.828	-0.23	-8.55497	-0.0073847
AC012594	lncRNA	0.57225	0.4015	0.2488	-7.73639	-0.00291576
AC012613	lncRNA	0.85	0.661	-0.2545	-8.41573	-0.128863
AC012613	lncRNA	0.981	0.877	-0.163	-8.57053	-0.00517143
AC012615	lncRNA	0.0378	0.00889	4.18	-4.10048	0.254343
AC012615	lncRNA	0.000569	3.71e-05	-13.9	2.35554	-2.33086	down
AC012625	lncRNA	0.596	0.346	1.04	-7.99821	0.218311
AC012629	lncRNA	0.559	0.279	1.21	-7.81052	0.12163
AC012640	lncRNA	0.587	0.331	-1.08	-7.95885	-0.267427
AC012640	lncRNA	0.00952	0.0016	6.25	-2.09695	0.900541
AC012640	lncRNA	0.2	0.0691	-2.31	-6.40616	-0.273417
AC012645	lncRNA	0.796	0.563	-0.619	-8.36467	-0.327064
AC012645	lncRNA	0.287833	0.167567	-1.92167	-6.17241	-0.262231
AC012668	lncRNA	0.7715	0.585	-0.6785	-8.19411	-0.153775
AC012668	lncRNA	0.7835	0.6015	0.4625	-8.25971	0.124666
AC012668	lncRNA	0.32732	0.2618	-3.96867	-4.35296	-1.03834
AC012676	lncRNA	0.00319	0.000394	8.49	-0.44144	0.658252
AC013248	lncRNA	0.881	0.665	0.46	-8.46171	0.0166513
AC013264	lncRNA	0.000519	3.24e-05	-14.3	2.51698	-2.43088	down
AC013269	lncRNA	0.872	0.653	-0.478	-8.45236	-0.0187952
AC013270	lncRNA	0.00211	0.000228	-9.54	0.20872	-2.395	down
AC013275	lncRNA	0.5207	0.42925	-1.8315	-6.75126	-0.380068
AC013286	lncRNA	0.133	0.0417	-2.73	-5.85428	-1.01753
AC013356	lncRNA	0.961	0.803	0.263	-8.54513	0.161266
AC013356	lncRNA	0.302	0.12	-1.87	-6.99141	-0.203014
AC013356	lncRNA	0.994	0.94	-0.0789	-8.58273	-0.0025185
AC013391	lncRNA	0.987	0.907	0.123	-8.57735	0.00388313
AC013391	lncRNA	0.996	0.973	0.0359	-8.5857	0.00112253
AC013391	lncRNA	0.793	0.56	0.624	-8.36119	0.230705
AC013401	lncRNA	0.978	0.883	0.1571	-8.56187	0.0048621
AC013402	lncRNA	0.0085	0.00139	6.45	-1.92929	1.51737
AC013402	lncRNA	0.737	0.5	0.728	-8.28412	0.0244251
AC013402	lncRNA	0.599	0.351	-1.03	-8.01051	-0.385953
AC013417	lncRNA	0.853	0.628	-0.516	-8.4307	-0.0165854
AC013436	lncRNA	0.953	0.767	0.314	-8.52796	0.130099
AC013437	lncRNA	0.911	0.703	-0.404	-8.49	-0.173174
AC013448	lncRNA	1	0.998	-0.00232	-8.58647	-7.35e-05
AC013448	lncRNA	0.984	0.89	0.146	-8.57367	0.00492883
AC013451	lncRNA	0.68	0.44	-0.839	-8.1913	-0.110622
AC013451	lncRNA	0.38185	0.252175	2.635	-5.99682	0.420599
AC013452	lncRNA	0.961	0.8	0.267	-8.54399	0.00915553
AC013457	lncRNA	0.0447	0.011	-3.96	-4.34193	-0.750648
AC013460	lncRNA	0.704	0.5547	-0.861167	-7.95442	-0.13865
AC013472	lncRNA	0.543	0.28875	-1.205	-7.8172	-0.414739
AC013472	lncRNA	0.156	0.0505	-2.57	-6.06527	-0.693177
AC013476	lncRNA	0.719	0.48	0.763	-8.25606	0.188952
AC013480	lncRNA	0.983	0.886	-0.151	-8.57287	-0.0052569
AC013509	lncRNA	0.986	0.899	0.133	-8.5758	0.0661519
AC013549	lncRNA	0.6	0.352	1.03	-8.01249	0.234603
AC013549	lncRNA	0.647	0.404	0.911	-8.12527	0.140292
AC013549	lncRNA	0.586	0.322	1.1	-7.93728	0.141143
AC013562	lncRNA	0.314	0.127	-1.84	-7.04283	-0.189341
AC013565	lncRNA	0.238	0.0872	2.13	-6.65452	0.390641
AC013565	lncRNA	0.0182	0.0036	5.19	-3.04913	0.634634
AC013640	lncRNA	0.996	0.971	0.0379	-8.58561	0.00122873
AC013643	lncRNA	0.709	0.471	-0.781	-8.24101	-0.533744
AC013644	lncRNA	0.5865	0.3245	-1.095	-7.94271	-0.440542
AC013652	lncRNA	0.252073	0.160624	10.7702	-1.83489	0.900292
AC013652	lncRNA	0.63629	0.512689	-4.105	-5.13541	-0.297206
AC013714	lncRNA	0.301	0.12	1.88	-6.98575	0.931978
AC013724	lncRNA	0.00113	9.76e-05	-11.4	1.21163	-1.33763
AC013726	lncRNA	0.935	0.736	-0.356	-8.51115	-0.0113866
AC013727	lncRNA	0.962	0.804	-0.261	-8.54567	-0.00859953
AC013727	lncRNA	0.976	0.852	0.196	-8.5635	0.00623123
AC013733	lncRNA	0.348	0.145	-1.73	-7.18402	-0.516405
AC013733	lncRNA	0.978	0.857	-0.19	-8.56479	-0.00864453
AC013762	lncRNA	0.751	0.516	-0.699	-8.30614	-0.46199
AC013799	lncRNA	0.776	0.542	-0.655	-8.33922	-0.0216623
AC015468	lncRNA	0.764	0.5345	0.379	-8.22625	0.34853
AC015468	lncRNA	0.961	0.799	-0.268	-8.54352	-0.00886787
AC015468	lncRNA	0.451	0.206	-1.46	-7.52733	-0.90014
AC015468	lncRNA	0.858	0.634	0.507	-8.43598	0.138963
AC015522	lncRNA	0.966	0.818	0.242	-8.55136	0.0077063
AC015563	lncRNA	0.586	0.313	1.12	-7.9126	0.358228
AC015563	lncRNA	0.997	0.98	0.0264	-8.58605	0.00095653
AC015660	lncRNA	0.597	0.349	1.03	-8.00453	0.276028
AC015660	lncRNA	0.0293	0.00649	-4.51	-3.73672	-0.472062
AC015674	lncRNA	0.00395	0.000524	7.98	-0.77973	0.767864
AC015689	lncRNA	0.00034	1.76e-05	16.2	3.23497	2.57376	up
AC015712	lncRNA	0.4444	0.27772	-0.854	-7.25064	-0.450922
AC015712	lncRNA	0.577	0.369767	-1.19033	-7.73421	-0.293976
AC015712	lncRNA	0.0525	0.0134	3.76	-4.57268	1.64397
AC015722	lncRNA	0.714	0.476	-0.771	-8.24943	-0.0430877
AC015727	lncRNA	0.0647	0.0173	-3.52	-4.86505	-1.26622
AC015771	lncRNA	0.9445	0.7495	-0.011	-8.51891	-0.0860987
AC015795	lncRNA	0.767	0.532	0.672	-8.327	0.0225557
AC015818	lncRNA	0.0156	0.00296	5.43	-2.81976	2.6253	up
AC015818	lncRNA	0.003715	0.0005015	8.495	-0.48444	0.858498
AC015818	lncRNA	0.271	0.104	-1.99	-6.83654	-0.726288
AC015818	lncRNA	0.448	0.204	-1.46	-7.51789	-0.196472
AC015819	lncRNA	0.978	0.863	-0.182	-8.56671	-0.111186
AC015845	lncRNA	0.7785	0.5735	-0.4495	-8.23403	-0.0162872
AC015845	lncRNA	0.7885	0.6395	-0.59685	-8.22587	-0.11852
AC015849	lncRNA	0.425	0.19	1.52	-7.44749	0.453308
AC015853	lncRNA	0.996	0.965	0.046	-8.5852	0.00143687
AC015853	lncRNA	0.978	0.86	0.186	-8.56575	0.00671727
AC015853	lncRNA	0.0559	0.0144	-3.69	-4.65734	-0.329089
AC015878	lncRNA	0.104	0.0309	-2.99	-5.52219	-0.811443
AC015878	lncRNA	0.586	0.305	-1.14	-7.88942	-0.285222
AC015908	lncRNA	0.649	0.546	-0.9587	-7.7881	-0.138691
AC015908	lncRNA	0.02715	0.005915	-0.015	-3.62891	0.140392
AC015908	lncRNA	0.0995	0.0293	-3.04	-5.46043	-0.448787
AC015908	lncRNA	0.574	0.292	-1.18	-7.85081	-0.557124
AC015909	lncRNA	0.0083305	0.00158278	7.625	0.84454	0.806747
AC015909	lncRNA	0.986	0.899	-0.133	-8.57581	-0.0042064
AC015909	lncRNA	0.897	0.685	0.43	-8.47736	0.126941
AC015909	lncRNA	0.8795	0.726	-0.277	-8.45547	-0.013978
AC015912	lncRNA	0.281	0.109	-1.95	-6.8883	-0.445256
AC015914	lncRNA	0.00948	0.00159	-6.26	-2.09035	-0.677558
AC015917	lncRNA	0.904	0.693	0.418	-8.48324	0.0966478
AC015921	lncRNA	0.986	0.899	-0.133	-8.57583	-0.00419773
AC015922	lncRNA	0.0738	0.0203	-3.37	-5.04761	-0.35245
AC015923	lncRNA	0.8805	0.695	-0.4255	-8.458	-0.0138636
AC015969	lncRNA	0.994	0.9465	-0.02165	-8.58318	0.00502863
AC015971	lncRNA	0.588667	0.326	-0.326667	-7.94516	-0.058446
AC015977	lncRNA	0.665	0.423	-0.872	-8.16123	-0.030459
AC015983	lncRNA	0.262	0.0994	-2.02	-6.7931	-0.488075
AC015987	lncRNA	0.965	0.816	-0.246	-8.55033	-0.0128108
AC016027	lncRNA	0.876	0.658	-0.47	-8.45663	-0.107858
AC016027	lncRNA	0.000512	3.18e-05	-14.4	2.53705	-1.97492
AC016027	lncRNA	0.997	0.981	-0.0256	-8.58608	-0.00080587
AC016044	lncRNA	0.258	0.0971	2.04	-6.76828	0.31438
AC016065	lncRNA	0.410241	0.295515	7.0125	-2.88185	0.792739
AC016074	lncRNA	0.949	0.758	-0.325	-8.52368	-0.0108293
AC016134	lncRNA	0.509	0.244	1.32	-7.68903	0.556218
AC016152	lncRNA	0.58	0.297	-1.16	-7.86653	-1.69
AC016168	lncRNA	0.7955	0.6435	0.5601	-8.29255	0.204759
AC016205	lncRNA	0.27954	0.139111	5.395	-3.78809	1.58454
AC016229	lncRNA	0.475	0.222	1.4	-7.59677	0.25531
AC016245	lncRNA	0.586	0.315	1.12	-7.91683	0.0882155
AC016257	lncRNA	0.996	0.967	0.044	-8.58531	0.00137187
AC016266	lncRNA	0.155	0.0501	-2.58	-6.05617	-0.466613
AC016292	lncRNA	0.956	0.773	-0.304	-8.5314	-0.0100146
AC016382	lncRNA	0.999	0.993	0.00896	-8.58642	0.00028673
AC016383	lncRNA	0.372	0.158	-1.66	-7.27047	-0.491348
AC016394	lncRNA	0.000546	3.49e-05	14.1	2.42768	0.773035
AC016395	lncRNA	0.52515	0.4474	-1.6375	-6.76558	-0.253658
AC016396	lncRNA	0.465	0.215	1.42	-7.56874	0.65634
AC016396	lncRNA	0.581	0.299	-1.16	-7.87167	-0.285784
AC016405	lncRNA	0.8325	0.6175	0.2205	-8.38731	0.086418
AC016405	lncRNA	0.96	0.795	-0.274	-8.54161	-0.00936597
AC016493	lncRNA	0.586	0.307	-1.14	-7.89462	-0.40748
AC016526	lncRNA	0.621	0.376	-0.972	-8.06729	-0.0331534
AC016550	lncRNA	0.986	0.898	-0.135	-8.57557	-0.0823851
AC016550	lncRNA	0.716	0.516	-0.832	-8.06033	-0.331497
AC016550	lncRNA	0.0623	0.0165	-3.56	-4.81204	-0.711609
AC016553	lncRNA	0.996	0.949	0.0674	-8.58374	0.0603
AC016556	lncRNA	0.3235	0.1385	-0.51	-6.91489	-0.181156
AC016571	lncRNA	0.738	0.501	0.726	-8.2859	0.0617895
AC016573	lncRNA	0.976	0.85	0.2	-8.5626	0.00721537
AC016576	lncRNA	0.964	0.811	-0.253	-8.54835	-0.06552
AC016590	lncRNA	0.109033	0.0431463	-5.57667	-3.12042	-1.27214
AC016595	lncRNA	0.951	0.763	-0.318	-8.52629	-0.0113302
AC016597	lncRNA	0.238333	0.0902	-2.19	-6.56836	-0.65575
AC016598	lncRNA	0.686	0.446	-0.827	-8.20139	-0.0292224
AC016598	lncRNA	0.443	0.201	-1.47	-7.50355	-0.106307
AC016642	lncRNA	0.5845	0.318	-1.115	-7.92114	-0.130509
AC016644	lncRNA	0.601	0.354	-1.02	-8.01705	-0.111921
AC016650	lncRNA	0.996	0.967	-0.0435	-8.58533	-0.0013597
AC016651	lncRNA	0.983	0.886	0.151	-8.57277	0.00504657
AC016683	lncRNA	0.75	0.515	0.1295	-8.29321	-0.107803
AC016687	lncRNA	0.714	0.48325	-0.1245	-8.20709	-0.0573885
AC016687	lncRNA	0.7915	0.6345	0.57485	-8.27849	0.133903
AC016700	lncRNA	0.982	0.882	0.156	-8.57189	0.00496403
AC016705	lncRNA	0.981	0.875	0.165	-8.57012	0.0465766
AC016708	lncRNA	0.0042085	0.00067643	14.995	1.73215	2.12891	up
AC016710	lncRNA	0.0646	0.0173	3.52	-4.86332	0.572584
AC016716	lncRNA	0.367	0.156	-1.67	-7.25508	-0.659294
AC016722	lncRNA	0.994	0.939	0.0805	-8.58258	0.0025612
AC016722	lncRNA	0.959	0.792	-0.279	-8.54018	-0.00903957
AC016723	lncRNA	0.50565	0.476945	2.76205	-5.68764	1.20356
AC016730	lncRNA	1	1	-0.000551	-8.58647	-1.78e-05
AC016735	lncRNA	0.032	0.00724	-4.39	-3.86302	-0.789523
AC016738	lncRNA	0.586	0.323	-1.1	-7.93838	-0.044533
AC016738	lncRNA	0.728333	0.581133	-0.682	-7.9414	-0.241706
AC016745	lncRNA	0.03335	0.00783	4.51	-3.76986	1.14064
AC016746	lncRNA	0.957	0.779	-0.297	-8.53396	-0.0470903
AC016747	lncRNA	0.0436747	0.01356	-14.224	-0.474188	-1.54307
AC016751	lncRNA	0.117	0.0356	-2.87	-5.67972	-0.524994
AC016751	lncRNA	0.00535	0.000776	7.33	-1.24316	2.35341	up
AC016766	lncRNA	0.61	0.365	-0.997	-8.04203	-0.0397723
AC016813	lncRNA	0.00712	0.00111	-6.78	-1.66521	-0.503716
AC016820	lncRNA	0.633	0.389	0.944	-8.09431	0.750888
AC016822	lncRNA	0.531	0.26	1.27	-7.74538	0.172453
AC016831	lncRNA	0.232233	0.09758	-2.70667	-5.94376	-0.64429
AC016866	lncRNA	0.261	0.0987	-2.03	-6.78546	-0.270475
AC016866	lncRNA	0.967	0.821	-0.239	-8.55235	-0.0076503
AC016868	lncRNA	0.969	0.827	-0.23	-8.55486	-0.00747427
AC016876	lncRNA	0.23341	0.139597	1.43767	-4.23561	0.0742904
AC016877	lncRNA	0.942	0.746	-0.343	-8.51666	-0.0204834
AC016885	lncRNA	0.319	0.129	-1.82	-7.06626	-0.213318
AC016885	lncRNA	0.953	0.768	0.312	-8.52862	0.0107788
AC016888	lncRNA	0.988	0.909	-0.12	-8.57776	-0.0039536
AC016903	lncRNA	0.586	0.308	-1.14	-7.89808	-0.261052
AC016903	lncRNA	0.905	0.696	-0.414	-8.48502	-0.19411
AC016907	lncRNA	0.853	0.708333	-0.389	-8.36053	-0.123197
AC016909	lncRNA	0.921	0.716	0.385	-8.49858	0.0137365
AC016910	lncRNA	0.000337	1.73e-05	-16.3	3.25633	-2.91467	down
AC016924	lncRNA	0.29805	0.156865	-3.635	-5.04807	-1.1318
AC016933	lncRNA	0.586	0.32	-1.1	-7.93186	-0.842063
AC016949	lncRNA	0.00176	0.000177	10.1	0.50544	0.649799
AC016968	lncRNA	0.982	0.88	0.159	-8.57124	0.0050925
AC016987	lncRNA	0.586	0.317	-1.11	-7.92353	-0.989486
AC016987	lncRNA	0.00204	0.000217	-9.63	0.26557	-2.06352	down
AC016993	lncRNA	0.924	0.721	0.379	-8.50147	0.0123383
AC016994	lncRNA	0.996	0.973	-0.0351	-8.58573	-0.0159608
AC016999	lncRNA	0.61	0.365	-0.998	-8.04148	-0.0464458
AC017002	lncRNA	0.5315	0.3828	1.157	-7.20298	0.297197
AC017002	lncRNA	0.599	0.351	1.03	-8.00987	0.228231
AC017002	lncRNA	5.01e-05	8.62e-07	30	6.73066	1.66799
AC017006	lncRNA	0.997	0.977	-0.0303	-8.58592	-0.0011416
AC017006	lncRNA	0.314	0.126	1.84	-7.04208	0.358712
AC017007	lncRNA	0.633	0.389	-0.944	-8.09446	-0.274626
AC017015	lncRNA	0.59	0.337	-1.06	-7.97436	-0.243466
AC017048	lncRNA	0.995	0.946	0.0714	-8.58341	0.00231827
AC017048	lncRNA	0.586	0.316	1.11	-7.92022	0.36155
AC017053	lncRNA	0.998	0.984	0.0208	-8.58621	0.0006557
AC017067	lncRNA	0.93	0.729	0.367	-8.50654	0.0878598
AC017071	lncRNA	0.31	0.125	-1.85	-7.02734	-0.565105
AC017074	lncRNA	0.962	0.805	0.261	-8.5458	0.103749
AC017074	lncRNA	0.74	0.503	0.721	-8.28919	0.0350563
AC017091	lncRNA	0.7615	0.588	-0.4915	-8.1891	-0.0346853
AC017100	lncRNA	0.0186	0.0037	5.16	-3.08027	0.78353
AC017101	lncRNA	0.9	0.689	0.424	-8.48029	0.177056
AC017104	lncRNA	0.140903	0.05886	-4.44667	-4.09748	-0.762013
AC017116	lncRNA	0.13175	0.047355	3.675	-4.84509	0.341916
AC018359	lncRNA	0.962	0.806	-0.259	-8.54631	-0.00856283
AC018371	lncRNA	0.000162	5.63e-06	-20.5	4.57104	-1.33053
AC018410	lncRNA	0.509	0.37075	-1.3195	-6.98325	-0.808715
AC018410	lncRNA	0.926	0.724	0.373	-8.50382	0.0843354
AC018413	lncRNA	0.00354	0.000453	8.23	-0.60745	0.89993
AC018437	lncRNA	0.434	0.195	-1.5	-7.47465	-0.387993
AC018442	lncRNA	0.472	0.22	1.4	-7.58947	0.391392
AC018450	lncRNA	0.2555	0.117775	-1.775	-5.48028	-0.142098
AC018450	lncRNA	0.586	0.316	-1.12	-7.91939	-0.0399118
AC018462	lncRNA	0.975	0.8695	0.13505	-8.55744	0.0866831
AC018467	lncRNA	0.745667	0.533667	-0.586333	-8.16495	-0.000740133
AC018495	lncRNA	0.614	0.369	-0.987	-8.05202	-0.359966
AC018511	lncRNA	0.994	0.942	-0.0766	-8.58295	-0.00240017
AC018511	lncRNA	0.995	0.946	0.0708	-8.58346	0.00226957
AC018521	lncRNA	0.092339	0.0310237	-7.8	-2.11165	-0.762158
AC018521	lncRNA	0.555	0.276	1.22	-7.80135	0.16873
AC018521	lncRNA	0.976	0.852	-0.196	-8.56347	-0.00697167
AC018521	lncRNA	0.464667	0.315533	1.63267	-7.12672	0.107445
AC018521	lncRNA	0.996	0.964	0.0472	-8.58513	0.0015035
AC018521	lncRNA	0.188	0.0641	2.38	-6.32436	1.00992
AC018541	lncRNA	0.9845	0.9085	-0.09795	-8.57193	-0.0032544
AC018552	lncRNA	0.586	0.327	-1.09	-7.94899	-0.5518
AC018552	lncRNA	0.998	0.984	0.0209	-8.58621	0.00529823
AC018557	lncRNA	0.2	0.069	2.32	-6.40481	0.249596
AC018557	lncRNA	0.974	0.845	-0.206	-8.56114	-0.00667537
AC018558	lncRNA	0.7	0.627867	-1.00176	-7.6389	-0.267759
AC018558	lncRNA	0.501	0.239	-1.34	-7.66778	-0.319579
AC018558	lncRNA	0.671	0.43	-0.86	-8.17271	-0.430394
AC018563	lncRNA	0.92875	0.7965	0.110725	-8.50856	0.00981848
AC018607	lncRNA	0.125	0.0385	2.8	-5.76508	0.617417
AC018616	lncRNA	0.962	0.804	0.262	-8.54558	0.00816553
AC018618	lncRNA	0.7295	0.4975	-0.477	-8.11534	-0.326746
AC018643	lncRNA	0.939	0.741	-0.349	-8.51408	-0.086589
AC018647	lncRNA	0.240375	0.198778	-8.6435	0.643957	-0.823366
AC018647	lncRNA	0.0137	0.00252	5.64	-2.6326	0.235569
AC018653	lncRNA	0.3345	0.14555	-1.89	-6.95288	-0.446955
AC018653	lncRNA	0.28145	0.1247	-0.95	-6.38879	-0.0110844
AC018680	lncRNA	0.5765	0.3045	-1.15	-7.88459	-0.0713759
AC018682	lncRNA	0.5	0.238	-1.34	-7.66561	-0.590989
AC018685	lncRNA	0.986	0.9	-0.133	-8.57589	-0.004253
AC018685	lncRNA	0.516	0.249	-1.31	-7.70709	-0.82142
AC018692	lncRNA	0.916	0.71	-0.394	-8.49463	-0.012699
AC018693	lncRNA	0.992	0.926	0.0972	-8.5808	0.0034128
AC018697	lncRNA	0.756	0.565333	0.153633	-8.20834	0.0557082
AC018716	lncRNA	2.56e-05	2.58e-07	38.4	8.07323	2.77907	up
AC018716	lncRNA	0.955	0.771	0.308	-8.52996	0.00976207
AC018730	lncRNA	0.789	0.556	0.631	-8.3564	0.696397
AC018731	lncRNA	0.992	0.931	0.0916	-8.58143	0.0426035
AC018742	lncRNA	0.6305	0.386	-0.068	-8.08443	-0.155695
AC018752	lncRNA	0.959	0.788	0.284	-8.53825	0.0088153
AC018767	lncRNA	0.586	0.321	-1.1	-7.93336	-0.224097
AC018767	lncRNA	0.553	0.275	-1.23	-7.7961	-0.304239
AC018767	lncRNA	0.065	0.0174	-3.51	-4.87157	-0.514748
AC018797	lncRNA	0.00248	0.000282	-9.11	-0.04384	-0.965097
AC018814	lncRNA	0.541	0.266	-1.25	-7.76791	-0.3717
AC018816	lncRNA	0.15	0.0481	-2.61	-6.01247	-0.471859
AC018832	lncRNA	0.375	0.16	-1.65	-7.28192	-0.229788
AC018845	lncRNA	0.983	0.887	-0.149	-8.57311	-0.0047947
AC018845	lncRNA	0.438	0.198	-1.49	-7.48725	-0.887788
AC018861	lncRNA	0.57	0.289	1.19	-7.84041	0.163237
AC018865	lncRNA	0.0407	0.00973	-4.08	-4.2051	-0.483319
AC018866	lncRNA	0.4515	0.219	-0.35	-7.47935	-0.631519
AC018878	lncRNA	0.763	0.529	0.677	-8.32283	0.365969
AC018904	lncRNA	0.863	0.642	-0.494	-8.44325	-0.0220716
AC018904	lncRNA	0.882	0.667	-0.458	-8.46327	-0.0375527
AC018943	lncRNA	0.6495	0.404	-0.9225	-8.11023	-0.184284
AC018946	lncRNA	0.959	0.787	0.286	-8.53781	0.0599294
AC018953	lncRNA	0.459	0.211	1.44	-7.55181	0.223316
AC018980	lncRNA	1	0.998	-0.00201	-8.58647	-6.86e-05
AC019055	lncRNA	0.232	0.0839	2.16	-6.61392	0.48678
AC019064	lncRNA	0.982	0.881	0.158	-8.57154	0.109159
AC019077	lncRNA	0.118	0.0361	-2.85	-5.69301	-0.359936
AC019080	lncRNA	0.264	0.1	-2.02	-6.80387	-0.505566
AC019103	lncRNA	0.969	0.827	0.23	-8.55478	0.0205438
AC019118	lncRNA	0.992	0.929	-0.094	-8.58116	-0.00325537
AC019118	lncRNA	0.6155	0.355	-0.166	-7.99511	-0.171964
AC019130	lncRNA	0.586	0.327	-1.09	-7.94992	-0.420231
AC019131	lncRNA	0.182	0.0612	-2.41	-6.27445	-0.656166
AC019133	lncRNA	0.996	0.951	0.0651	-8.58392	0.0403852
AC019155	lncRNA	0.958	0.784	0.29	-8.53648	0.0098053
AC019155	lncRNA	7.38e-06	2.62e-08	61	10.4281	5.13426	up
AC019163	lncRNA	0.639	0.396	0.93	-8.10754	0.248749
AC019171	lncRNA	0.17	0.0564	-2.48	-6.18571	-0.20588
AC019183	lncRNA	0.0833	0.0235	-3.23	-5.21506	-0.386375
AC019185	lncRNA	0.259	0.0974	2.04	-6.77096	0.528658
AC019186	lncRNA	0.857	0.633	0.508	-8.43542	0.0734909
AC019197	lncRNA	0.50355	0.489865	-3.0843	-5.38674	-0.441093
AC019205	lncRNA	0.19843	0.088418	3.68333	-4.33024	0.614157
AC019209	lncRNA	0.264	0.1	2.02	-6.79973	0.28571
AC019209	lncRNA	0.586	0.314	-1.12	-7.91418	-0.0484655
AC019209	lncRNA	0.823	0.594	-0.57	-8.3974	-0.145982
AC019211	lncRNA	0.58	0.298	-1.16	-7.86766	-0.0620105
AC019254	lncRNA	0.4225	0.2242	-1.57	-7.34052	-0.380281
AC019254	lncRNA	0.973	0.839	-0.214	-8.55901	-0.0075823
AC019257	lncRNA	0.315	0.1275	-1.84	-7.03298	-0.626926
AC019270	lncRNA	0.586	0.325	-1.09	-7.94321	-0.346074
AC019294	lncRNA	0.5146	0.480285	2.14395	-6.24963	0.0766296
AC019294	lncRNA	0.9965	0.965	-0.0169	-8.58503	-0.00623687
AC019294	lncRNA	0.6925	0.453	-0.09	-8.20628	-0.00722695
AC019330	lncRNA	0.326	0.133	-1.8	-7.09265	-0.652206
AC019349	lncRNA	0.852	0.627	-0.517	-8.42984	-0.23816
AC020551	lncRNA	0.0382	0.00901	4.16	-4.11631	1.17143
AC020558	lncRNA	0.597	0.348	1.04	-8.00241	0.21548
AC020558	lncRNA	0.606	0.36	-1.01	-8.03007	-0.417828
AC020571	lncRNA	0.322265	0.1968	2.656	-5.09896	0.420623
AC020594	lncRNA	0.0083	0.00134	-6.5	-1.89154	-0.828537
AC020595	lncRNA	0.656	0.414	0.891	-8.14393	0.141113
AC020611	lncRNA	0.967	0.82	0.24	-8.55216	0.00762863
AC020612	lncRNA	0.984	0.889	-0.147	-8.57353	-0.0816099
AC020651	lncRNA	0.586	0.315	-1.12	-7.9173	-0.372305
AC020656	lncRNA	0.107	0.0319	2.96	-5.55635	0.251998
AC020658	lncRNA	0.966	0.817	0.244	-8.55081	0.0231526
AC020658	lncRNA	0.341	0.142	1.75	-7.15694	0.853192
AC020659	lncRNA	0.377133	0.3022	-2.37067	-6.15437	-0.195291
AC020659	lncRNA	0.5565	0.3215	1.1755	-7.81771	0.372264
AC020661	lncRNA	0.227	0.0813	2.18	-6.57986	0.940204
AC020661	lncRNA	0.955	0.773	-0.305	-8.53119	-0.101418
AC020661	lncRNA	0.203	0.0704	2.3	-6.42654	0.433591
AC020687	lncRNA	0.463	0.214	-1.43	-7.56258	-0.160126
AC020703	lncRNA	0.586	0.311	-1.13	-7.90489	-0.114089
AC020704	lncRNA	0.602	0.355	-1.02	-8.01887	-0.15496
AC020718	lncRNA	0.32	0.13	1.81	-7.07058	0.323361
AC020719	lncRNA	0.7795	0.549	0.1635	-8.3293	0.0733372
AC020741	lncRNA	0.501	0.24	1.34	-7.66995	0.256316
AC020743	lncRNA	0.956	0.774	0.303	-8.53175	0.0437889
AC020743	lncRNA	0.584	0.303	1.15	-7.88254	0.0460664
AC020743	lncRNA	0.612	0.366	0.994	-8.04531	0.233848
AC020763	lncRNA	0.135	0.0426	-2.71	-5.87733	-0.576317
AC020763	lncRNA	0.0189	0.00376	-5.14	-3.101	-0.6178
AC020779	lncRNA	1.25e-05	6.92e-08	-50.1	9.4662	-2.34003	down
AC020891	lncRNA	0.844	0.618	0.532	-8.42095	0.139442
AC020891	lncRNA	4.08e-06	8.66e-09	76.3	11.435	5.22581	up
AC020891	lncRNA	0.571	0.289	-1.19	-7.84257	-0.305613
AC020892	lncRNA	0.999	0.995	-0.00643	-8.58644	-0.0002048
AC020892	lncRNA	0.788	0.555	-0.633	-8.35515	-0.0787481
AC020900	lncRNA	0.997	0.978	0.0284	-8.58598	0.00092413
AC020912	lncRNA	0.6375	0.384	-0.9655	-8.0673	-0.220632
AC020916	lncRNA	0.371	0.158	1.66	-7.2695	0.216635
AC020928	lncRNA	0.487621	0.424005	9.151	-2.35628	0.611299
AC020978	lncRNA	0.997	0.982	-0.0232	-8.58615	-0.0020072
AC020978	lncRNA	0.736	0.499	-0.729	-8.28329	-0.296893
AC020978	lncRNA	0.606	0.36	-1.01	-8.03026	-0.268243
AC020978	lncRNA	0.959	0.789	0.283	-8.53881	0.0515293
AC020978	lncRNA	0.04708	0.01294	-4.94	-3.50291	-0.538813
AC020978	lncRNA	0.64	0.397	-0.927	-8.11013	-0.068824
AC020980	lncRNA	0.986	0.901	-0.131	-8.57622	-0.0042165
AC021006	lncRNA	0.3209	0.189375	-2.918	-5.71795	-0.661122
AC021016	lncRNA	0.000147	4.87e-06	-21.1	4.74169	-2.0002	down
AC021028	lncRNA	0.0237	0.005	4.81	-3.43187	1.86898
AC021035	lncRNA	0.586	0.313	1.12	-7.91115	0.219178
AC021054	lncRNA	0.32972	0.288501	-5.34333	-3.44572	-1.01256
AC021066	lncRNA	0.986	0.902	-0.13	-8.57632	-0.0042222
AC021074	lncRNA	0.818	0.5955	-0.577	-8.37761	-0.0359274
AC021078	lncRNA	0.00867	0.00157233	7.35333	-1.35585	0.369514
AC021086	lncRNA	0.7975	0.58	0.6195	-8.32563	0.239811
AC021087	lncRNA	0.349	0.145	1.73	-7.18472	0.540309
AC021087	lncRNA	0.000246	1.07e-05	18	3.81872	4.95096	up
AC021088	lncRNA	0.959	0.788	-0.284	-8.53842	-0.00938917
AC021127	lncRNA	0.992	0.927	-0.096	-8.58094	-0.0067194
AC021151	lncRNA	0.994	0.939	0.081	-8.58253	0.00253033
AC021180	lncRNA	0.216	0.0761	2.24	-6.50939	0.994113
AC021188	lncRNA	0.228	0.0818	2.18	-6.58659	0.187576
AC021192	lncRNA	0.447	0.204	-1.46	-7.51604	-0.477844
AC021224	lncRNA	0.479	0.224	1.39	-7.60877	0.121244
AC021231	lncRNA	0.612	0.366	-0.994	-8.04537	-0.384309
AC021237	lncRNA	0.588	0.332	1.07	-7.96367	0.347311
AC021242	lncRNA	0.1098	0.0366227	-0.593333	-4.52171	-0.190354
AC021351	lncRNA	0.398	0.21855	-1.717	-7.1368	-0.542061
AC021355	lncRNA	0.6115	0.349	-1.0415	-7.99285	-1.31149
AC021382	lncRNA	0.504	0.241	-1.33	-7.67632	-0.493621
AC021393	lncRNA	0.941	0.745	0.345	-8.51596	0.0767023
AC021439	lncRNA	0.66	0.418	0.883	-8.15098	0.328468
AC021483	lncRNA	0.586	0.316	1.11	-7.92028	1.09435
AC021491	lncRNA	0.696	0.457	0.807	-8.21864	0.330835
AC021491	lncRNA	0.759	0.5245	-0.688	-8.31085	-0.219462
AC021491	lncRNA	0.859	0.635	-0.505	-8.43714	-0.016976
AC021491	lncRNA	0.00252	0.000288	-9.07	-0.07042	-2.08708	down
AC021506	lncRNA	0.815	0.585	-0.584	-8.38847	-0.0400583
AC021517	lncRNA	0.00838	0.00136	-6.48	-1.9078	-0.758292
AC021534	lncRNA	0.983	0.888	-0.148	-8.57333	-0.00470177
AC021546	lncRNA	0.66	0.417	-0.884	-8.15013	-0.360689
AC021549	lncRNA	0.79	0.558	0.628	-8.35813	0.0728859
AC021678	lncRNA	0.977	0.854	0.194	-8.56384	0.00646893
AC021683	lncRNA	0.0574	0.0149	-3.66	-4.69515	-0.281088
AC021683	lncRNA	0.000558	3.6e-05	14	2.39285	4.87445	up
AC021698	lncRNA	0.0692	0.0188	-3.44	-4.95953	-0.844439
AC021733	lncRNA	0.601	0.354	-1.02	-8.01692	-0.221527
AC021736	lncRNA	0.537	0.264	-1.26	-7.75988	-0.178813
AC021739	lncRNA	0.439	0.198	1.48	-7.49116	0.502581
AC021739	lncRNA	0.00153	0.000148	-10.4	0.71705	-1.70227
AC021739	lncRNA	0.965	0.816	0.245	-8.55059	0.0075961
AC021739	lncRNA	0.586	0.317	-1.11	-7.92322	-0.217917
AC021744	lncRNA	0.489	0.232	0.145	-7.62188	0.222828
AC021752	lncRNA	0.0148	0.00275	-5.53	-2.73487	-0.517377
AC021755	lncRNA	0.827	0.598	0.563	-8.40196	0.311574
AC021785	lncRNA	0.277	0.107	-1.97	-6.86863	-0.678267
AC021818	lncRNA	0.27	0.103	1.99	-6.83291	0.171817
AC021915	lncRNA	0.733	0.496	-0.735	-8.27852	-0.387954
AC021915	lncRNA	0.85	0.625	-0.521	-8.42742	-0.178684
AC021979	lncRNA	0.581	0.299	-1.16	-7.87132	-0.28283
AC021979	lncRNA	0.959	0.789	0.282	-8.53907	0.00875203
AC022007	lncRNA	0.00131	0.00012	10.9	0.96673	1.35161
AC022028	lncRNA	0.205	0.0713	-2.29	-6.43926	-0.298823
AC022031	lncRNA	2.53e-05	2.53e-07	38.5	8.09432	2.18265	up
AC022034	lncRNA	0.435007	0.325	24.491	0.424295	1.67945
AC022035	lncRNA	0.00268	0.000314	8.91	-0.17247	2.58916	up
AC022039	lncRNA	0.972	0.837	0.217	-8.55829	0.00690597
AC022075	lncRNA	1.72e-05	1.3e-07	44.1	8.81191	3.78907	up
AC022081	lncRNA	0.953	0.768	0.312	-8.52846	0.00981467
AC022087	lncRNA	0.47	0.219	-1.41	-7.58365	-0.565628
AC022092	lncRNA	0.37	0.158	1.66	-7.26538	0.27674
AC022098	lncRNA	0.714	0.476	-0.771	-8.24932	-0.407574
AC022113	lncRNA	0.996	0.948	0.0688	-8.58363	0.00221643
AC022113	lncRNA	0.769	0.535	-0.667	-8.33044	-0.192304
AC022118	lncRNA	0.959	0.789	0.282	-8.53901	0.00875513
AC022126	lncRNA	0.972	0.838	-0.216	-8.55856	-0.007259
AC022140	lncRNA	0.74	0.551667	0.749667	-8.14286	0.501962
AC022145	lncRNA	0.631	0.387	-0.949	-8.08926	-0.143071
AC022164	lncRNA	0.000135	4.22e-06	-21.7	4.90799	-2.32032	down
AC022165	lncRNA	0.687	0.448	-0.824	-8.20405	-0.433703
AC022166	lncRNA	0.9895	0.9165	-0.02315	-8.57882	0.0125521
AC022166	lncRNA	0.964	0.813	-0.25	-8.5491	-0.0609607
AC022182	lncRNA	0.743	0.530667	-0.262	-8.11782	-0.0318324
AC022196	lncRNA	0.6235	0.4575	0.8385	-7.72686	0.391985
AC022201	lncRNA	0.586	0.312	1.13	-7.90896	0.225879
AC022201	lncRNA	0.586	0.314	1.12	-7.91483	0.274214
AC022211	lncRNA	0.268	0.102	2	-6.82083	0.404263
AC022211	lncRNA	0.083395	0.027241	-3.745	-2.83561	-0.148921
AC022211	lncRNA	0.9	0.689	0.425	-8.47996	0.0799665
AC022217	lncRNA	0.959	0.788	-0.284	-8.53851	-0.00939007
AC022217	lncRNA	0.984	0.89	0.145	-8.57384	0.00460533
AC022239	lncRNA	0.737667	0.495	-0.284	-8.20503	0.00349639
AC022240	lncRNA	0.0284	0.00626	-4.55	-3.69465	-1.66028
AC022272	lncRNA	0.405	0.2408	-0.9675	-6.99632	-0.146241
AC022274	lncRNA	0.725	0.487	-0.75	-8.2665	-0.398039
AC022294	lncRNA	0.96	0.796	0.272	-8.54227	0.00850173
AC022336	lncRNA	2.57e-05	2.59e-07	-38.3	8.06699	-2.80629	down
AC022364	lncRNA	0.0465	0.0115	3.91	-4.39863	0.755988
AC022367	lncRNA	0.5355	0.289	-1.2145	-7.79737	-0.394337
AC022387	lncRNA	0.49	0.232	-1.36	-7.64016	-0.203335
AC022390	lncRNA	0.000482	2.93e-05	14.6	2.63626	1.60715
AC022395	lncRNA	0.1385	0.04425	-0.235	-5.87739	-0.414557
AC022398	lncRNA	0.9715	0.8425	-0.21	-8.55482	-0.0840133
AC022405	lncRNA	0.58	0.297	-1.16	-7.86605	-0.615134
AC022424	lncRNA	0.524	0.255	-1.29	-7.7274	-0.23642
AC022431	lncRNA	0.572	0.29	-1.19	-7.84344	-0.154124
AC022440	lncRNA	0.726	0.535	-0.00766667	-8.17715	0.0590616
AC022441	lncRNA	0.978	0.863	-0.182	-8.56661	-0.0234157
AC022441	lncRNA	0.5	0.239	-1.34	-7.667	-0.559995
AC022445	lncRNA	0.961	0.801	-0.266	-8.54415	-0.00829167
AC022447	lncRNA	0.673	0.432	0.854	-8.17737	0.0303989
AC022447	lncRNA	0.997	0.979	-0.0274	-8.58602	-0.0008663
AC022447	lncRNA	0.918	0.712	-0.391	-8.49591	-0.0122873
AC022447	lncRNA	0.023	0.00481	-4.85	-3.38858	-0.388209
AC022447	lncRNA	0.934	0.734	-0.359	-8.50997	-0.183417
AC022447	lncRNA	0.983	0.889	-0.147	-8.5735	-0.00491503
AC022447	lncRNA	0.66	0.418	-0.884	-8.15045	-0.237952
AC022469	lncRNA	0.83	0.602	-0.557	-8.40549	-0.371954
AC022469	lncRNA	0.998	0.99	-0.0131	-8.58637	-0.0004498
AC022498	lncRNA	0.973	0.843	-0.209	-8.56035	-0.0207002
AC022509	lncRNA	0.0342533	0.00887233	5.63667	-2.91699	0.992766
AC022509	lncRNA	0.00165	0.000164	10.2	0.59896	1.38201
AC022509	lncRNA	0.8675	0.65	-0.097	-8.44355	0.00260714
AC022511	lncRNA	0.546	0.27	-1.24	-7.77995	-0.287126
AC022523	lncRNA	0.992	0.927	-0.0959	-8.58094	-0.0498715
AC022523	lncRNA	0.58	0.297	1.17	-7.86567	0.210327
AC022535	lncRNA	0.968	0.823	-0.236	-8.55331	-0.00753873
AC022537	lncRNA	0.988	0.911	0.118	-8.57812	0.0039293
AC022540	lncRNA	0.219	0.0779	-2.22	-6.5342	-0.984955
AC022568	lncRNA	0.1235	0.03805	-2.81	-5.75181	-0.457736
AC022613	lncRNA	0.0763	0.0212	3.335	-5.08519	0.360904
AC022613	lncRNA	0.01695	0.003445	-5.655	-2.67243	-0.859905
AC022613	lncRNA	0.0013	0.000118	10.9	0.9835	0.810193
AC022634	lncRNA	0.968	0.823	0.235	-8.55342	0.00733647
AC022639	lncRNA	0.5625	0.388675	-0.7215	-7.376	-0.109711
AC022655	lncRNA	0.588	0.333	-1.07	-7.96431	-0.4663
AC022690	lncRNA	0.929	0.728	0.368	-8.50635	0.011771
AC022695	lncRNA	0.987	0.907	-0.122	-8.5775	-0.0039211
AC022695	lncRNA	0.99	0.917	0.109	-8.57929	0.00395197
AC022706	lncRNA	0.30553	0.232955	-4.32289	-4.47485	-0.914061
AC022710	lncRNA	0.586	0.321	1.1	-7.93358	0.199317
AC022730	lncRNA	0.762	0.527	-0.679	-8.32145	-0.0295865
AC022730	lncRNA	0.00851	0.00139	-6.45	-1.93003	-0.645293
AC022733	lncRNA	0.587	0.328	-1.08	-7.95272	-0.157383
AC022733	lncRNA	0.00568	0.000836	-7.21	-1.331	-0.814187
AC022762	lncRNA	0.754	0.519	-0.695	-8.30987	-0.0819027
AC022778	lncRNA	0.996	0.973	0.0357	-8.58571	0.00117743
AC022784	lncRNA	0.6685	0.469988	-0.569175	-7.96736	-0.126798
AC022784	lncRNA	0.525	0.256	-1.28	-7.73082	-0.427691
AC022784	lncRNA	0.996	0.97	0.0399	-8.58551	0.00125033
AC022784	lncRNA	0.553	0.3915	-1.0215	-7.38642	-0.446328
AC022796	lncRNA	0.8025	0.6145	-0.369	-8.32567	-0.0153458
AC022809	lncRNA	0.986	0.902	-0.129	-8.57648	-0.0158845
AC022816	lncRNA	0.56	0.28	-1.21	-7.81364	-0.496503
AC022819	lncRNA	0.187	0.0633	2.39	-6.31082	0.460265
AC022858	lncRNA	0.5995	0.349	-1.0375	-8.00315	-0.298127
AC022872	lncRNA	0.983	0.883	-0.155	-8.5721	-0.00640947
AC022874	lncRNA	0.951	0.763	0.318	-8.52617	0.0102676
AC022893	lncRNA	0.339	0.14	-1.76	-7.14703	-0.650989
AC022893	lncRNA	9e-05	2.19e-06	24.9	5.66599	5.54745	up
AC022898	lncRNA	0.6815	0.449	-0.925	-8.02919	-0.217581
AC022903	lncRNA	0.456	0.209	1.44	-7.54167	0.576465
AC022915	lncRNA	0.171	0.0567	2.47	-6.19227	0.378197
AC022915	lncRNA	0.5245	0.38405	1.6205	-7.08584	0.825894
AC022915	lncRNA	0.998	0.988	-0.0164	-8.58631	-0.00056373
AC022916	lncRNA	0.534247	0.379108	3.35733	-5.65012	0.450367
AC022929	lncRNA	0.599	0.352	-1.03	-8.01198	-0.137824
AC022929	lncRNA	0.00388	0.000511	8.02	-0.74997	2.25102	up
AC022960	lncRNA	0.996	0.971	0.0381	-8.5856	0.00119847
AC022973	lncRNA	0.962	0.807	0.257	-8.54696	0.00812163
AC022973	lncRNA	0.996	0.95	0.0662	-8.58383	0.00216723
AC022973	lncRNA	0.00364	0.000471	-8.17	-0.65175	-1.27375
AC023024	lncRNA	0.471	0.219	1.41	-7.58666	0.440186
AC023034	lncRNA	0.5885	0.3595	0.464	-7.85518	0.51156
AC023034	lncRNA	0.789	0.556	-0.631	-8.35656	-0.315988
AC023043	lncRNA	0.0471	0.0117	-3.9	-4.41624	-0.472754
AC023051	lncRNA	0.39	0.169	1.61	-7.33434	0.711067
AC023078	lncRNA	0.986	0.9	0.133	-8.57588	0.0170829
AC023115	lncRNA	0.978	0.863	0.181	-8.56682	0.0613336
AC023128	lncRNA	0.995	0.943	0.0757	-8.58302	0.0374482
AC023136	lncRNA	0.586	0.317	-1.11	-7.92285	-0.249181
AC023137	lncRNA	0.0202	0.0041	-5.04	-3.20145	-1.09884
AC023154	lncRNA	0.927	0.808333	0.2377	-8.51033	0.00944049
AC023158	lncRNA	0.833	0.605	0.552	-8.40907	0.0852837
AC023161	lncRNA	0.846	0.62	0.529	-8.42312	0.0200077
AC023194	lncRNA	0.186025	0.0795004	-15.83	-0.27617	-1.29354
AC023200	lncRNA	0.822	0.593	0.571	-8.39663	0.0238309
AC023202	lncRNA	0.0202	0.0041	5.04	-3.20079	1.38632
AC023300	lncRNA	0.955	0.772	-0.306	-8.53076	-0.00978677
AC023347	lncRNA	0.489	0.2325	-1.375	-7.62061	-0.568799
AC023355	lncRNA	0.566333	0.3817	-0.622667	-7.5513	-0.12378
AC023389	lncRNA	0.456	0.21	-1.44	-7.54379	-0.240779
AC023389	lncRNA	0.0153	0.00288	5.47	-2.7876	0.458317
AC023394	lncRNA	0.586	0.32	1.1	-7.93159	0.102398
AC023394	lncRNA	0.693	0.454	0.813	-8.21373	0.062468
AC023403	lncRNA	0.934	0.763	-0.116	-8.51755	-0.00350826
AC023442	lncRNA	0.996	0.965	-0.0456	-8.58522	-0.00192237
AC023442	lncRNA	0.718	0.513333	0.006	-8.1298	0.0648329
AC023469	lncRNA	0.978	0.857	0.19	-8.56477	0.0069236
AC023481	lncRNA	0.586	0.32	-1.11	-7.92961	-1.5837
AC023490	lncRNA	0.490205	0.424393	-3.554	-4.91052	-0.677846
AC023510	lncRNA	0.0039	0.000515	-8.01	-0.7594	-1.44533
AC023511	lncRNA	0.965	0.815	0.247	-8.55001	0.0759161
AC023595	lncRNA	0.32	0.13	-1.82	-7.06756	-0.384723
AC023632	lncRNA	0.996	0.952	0.0631	-8.58408	0.010921
AC023632	lncRNA	0.983	0.888	0.148	-8.57326	0.00480857
AC023644	lncRNA	0.775	0.5625	-0.673	-8.25794	-0.0343721
AC023669	lncRNA	0.281	0.109	-1.95	-6.8907	-0.489078
AC023669	lncRNA	0.0104	0.00178	-6.1	-2.2245	-0.648316
AC023781	lncRNA	0.881	0.6985	0.421	-8.45796	0.0990094
AC023790	lncRNA	0.8135	0.601	0.2735	-8.35347	0.0117023
AC023794	lncRNA	0.000434	2.52e-05	-15.1	2.81337	-2.0735	down
AC023794	lncRNA	0.49057	0.424459	3.636	-5.00225	0.525749
AC023794	lncRNA	0.477	0.377233	-1.51397	-7.15235	-0.317436
AC023794	lncRNA	0.589	0.334	1.07	-7.96875	0.214139
AC023794	lncRNA	0.395	0.172	-1.6	-7.34949	-0.181299
AC023796	lncRNA	0.691	0.451	0.818	-8.20972	0.281632
AC023796	lncRNA	0.233	0.0847	2.15	-6.62423	0.489623
AC023813	lncRNA	0.996	0.953	-0.0614	-8.58421	-0.0019155
AC023813	lncRNA	0.884	0.669	-0.455	-8.46471	-0.0394787
AC023824	lncRNA	0.799	0.567	0.613	-8.36912	0.142935
AC023824	lncRNA	0.794	0.6365	0.465	-8.29251	0.0843156
AC023824	lncRNA	0.987	0.905	-0.125	-8.57708	-0.00399317
AC023824	lncRNA	0.0513	0.013	-3.79	-4.54103	-1.10283
AC023825	lncRNA	0.0706	0.0193	-3.42	-4.987	-0.69546
AC023830	lncRNA	0.367	0.156	-1.67	-7.2551	-0.817111
AC023866	lncRNA	0.925	0.724	-0.374	-8.50219	-0.0122918
AC023886	lncRNA	0.7715	0.5485	-0.4065	-8.23044	-0.0505361
AC023905	lncRNA	0.572	0.327333	0.135333	-7.89297	-0.0639007
AC023906	lncRNA	0.902	0.692	0.42	-8.4821	0.0574881
AC023906	lncRNA	0.16	0.0524	-2.54	-6.10532	-0.320404
AC023906	lncRNA	0.7655	0.5345	-0.7225	-8.22284	-0.270784
AC023906	lncRNA	0.338	0.14	-1.76	-7.14252	-0.971527
AC023908	lncRNA	0.514	0.248	-1.31	-7.70353	-0.245673
AC023908	lncRNA	0.0323	0.00733	4.38	-3.87727	0.423491
AC023946	lncRNA	0.237	0.0866	2.13	-6.64731	0.708463
AC023983	lncRNA	0.586	0.308	1.14	-7.8982	0.331095
AC023983	lncRNA	0.366	0.155	1.68	-7.24898	0.266314
AC024022	lncRNA	0.636666	0.537694	-4.011	-5.22003	-0.264386
AC024028	lncRNA	0.996	0.965	-0.046	-8.5852	-0.0055826
AC024084	lncRNA	0.885	0.67	0.452	-8.46597	0.259298
AC024132	lncRNA	0.692	0.452	0.815	-8.2117	0.277019
AC024132	lncRNA	0.0544	0.014	-3.72	-4.62098	-0.890299
AC024132	lncRNA	0.57	0.288	-1.19	-7.83914	-0.316806
AC024145	lncRNA	0.601	0.355	-1.02	-8.01805	-0.15744
AC024224	lncRNA	0.969	0.827	-0.23	-8.55479	-0.00737723
AC024230	lncRNA	0.000898	7.07e-05	12.2	1.59421	2.90861	up
AC024257	lncRNA	0.987	0.907	-0.123	-8.57745	-0.00413207
AC024257	lncRNA	0.00272	0.00032	-8.87	-0.19373	-1.46143
AC024267	lncRNA	0.5885	0.3215	0.04	-7.93311	0.01783
AC024267	lncRNA	0.0063	0.000949	-7.01	-1.48193	-0.568533
AC024267	lncRNA	0.7785	0.579	0.434	-8.25019	0.0710449
AC024267	lncRNA	0.601	0.354	-1.02	-8.0164	-0.473272
AC024267	lncRNA	0.0439	0.0107	-3.98	-4.31637	-0.598784
AC024270	lncRNA	0.918	0.712	0.391	-8.49588	0.109264
AC024270	lncRNA	0.215	0.0758	2.24	-6.50548	1.15251
AC024270	lncRNA	0.582	0.3	-1.16	-7.87497	-0.444553
AC024337	lncRNA	0.979	0.864	-0.18	-8.56708	-0.00575573
AC024361	lncRNA	0.53	0.259	-1.27	-7.74219	-0.273994
AC024361	lncRNA	0.012	0.00214	-5.85	-2.44081	-0.354568
AC024382	lncRNA	0.586	0.326	1.09	-7.948	0.201792
AC024475	lncRNA	0.586	0.323	-1.1	-7.94003	-0.0433969
AC024475	lncRNA	0.931	0.731	-0.364	-8.50785	-0.0116066
AC024475	lncRNA	0.935	0.736	0.357	-8.51104	0.0113491
AC024559	lncRNA	0.976	0.85	-0.199	-8.56272	-0.00634293
AC024560	lncRNA	0.000151	5.06e-06	21	4.69719	1.30735
AC024560	lncRNA	0.04075	0.010045	4.25	-4.04614	1.16939
AC024560	lncRNA	0.261609	0.127004	9.995	-1.84619	1.11163
AC024579	lncRNA	0.235	0.0856	-2.14	-6.63549	-0.973926
AC024581	lncRNA	0.9655	0.86	0.1891	-8.54779	0.0903911
AC024587	lncRNA	0.35	0.15165	0.405	-7.07988	-0.178653
AC024597	lncRNA	0.985	0.895	-0.14	-8.57479	-0.0044659
AC024600	lncRNA	0.569	0.288	-1.19	-7.83737	-0.103767
AC024601	lncRNA	0.586	0.324	-1.1	-7.94045	-0.206933
AC024610	lncRNA	0.586	0.325	-1.09	-7.94545	-0.307709
AC024614	lncRNA	0.759	0.524	0.686	-8.31669	0.0812121
AC024614	lncRNA	0.0522	0.0133	-3.77	-4.5623	-0.973617
AC024619	lncRNA	0.7065	0.5615	-0.80695	-8.00703	-0.385995
AC024619	lncRNA	0.323	0.131	-1.81	-7.08116	-0.265688
AC024619	lncRNA	0.586	0.308	-1.14	-7.89815	-0.229055
AC024651	lncRNA	0.7545	0.52	-0.36	-8.21612	-0.121285
AC024651	lncRNA	0.597	0.348	1.04	-8.00151	0.106008
AC024681	lncRNA	0.993	0.932	0.0892	-8.58169	0.00285427
AC024896	lncRNA	0.000638	4.34e-05	13.5	2.17156	0.805206
AC024901	lncRNA	0.762	0.527	0.68	-8.32069	0.368292
AC024908	lncRNA	0.102306	0.0346946	4.686	-3.98233	0.923593
AC024909	lncRNA	0.765	0.53	-0.675	-8.32495	-0.152041
AC024958	lncRNA	0.73725	0.511	-0.62975	-8.16499	-0.19542
AC025030	lncRNA	0.837	0.609	0.545	-8.41315	0.147934
AC025031	lncRNA	0.586	0.32	-1.1	-7.93139	-0.388545
AC025031	lncRNA	1	0.997	0.00337	-8.58646	0.0001111
AC025034	lncRNA	0.0786	0.0219	-3.29	-5.1352	-0.501502
AC025034	lncRNA	0.4425	0.2375	-1.4945	-7.43736	-0.44404
AC025035	lncRNA	0.053575	0.015305	-4.9	-3.56919	-0.55499
AC025038	lncRNA	0.993	0.935	-0.0855	-8.58207	-0.00323917
AC025040	lncRNA	0.9195	0.7525	0.3385	-8.5036	0.0109373
AC025043	lncRNA	0.599	0.35	-1.03	-8.00818	-0.0502864
AC025154	lncRNA	0.886	0.672	-0.45	-8.46706	-0.0700634
AC025154	lncRNA	0.631333	0.46	-1.00233	-7.86645	-0.137929
AC025162	lncRNA	0.0915	0.0264	-3.13	-5.34337	-0.202039
AC025164	lncRNA	0.64574	0.556311	2.19803	-6.18575	0.73296
AC025171	lncRNA	0.3797	0.2524	2.05533	-6.6167	0.312602
AC025171	lncRNA	0.42794	0.311094	-2.78176	-5.85951	-0.296865
AC025171	lncRNA	0.50045	0.44614	-2.7285	-5.75637	-0.493529
AC025174	lncRNA	0.228	0.0818	-2.18	-6.58686	-0.19531
AC025176	lncRNA	0.00108	9.22e-05	11.5	1.27953	1.427
AC025178	lncRNA	0.962	0.805	-0.26	-8.54609	-0.00906313
AC025180	lncRNA	0.677	0.5475	-0.88695	-7.90391	-0.0545032
AC025183	lncRNA	7.06e-07	9.71e-11	189	14.1372	8.08893	up
AC025183	lncRNA	0.639	0.395	0.931	-8.10705	0.096054
AC025187	lncRNA	0.863	0.642	-0.495	-8.44261	-0.0565752
AC025188	lncRNA	0.304	0.121	-1.87	-6.99812	-0.417312
AC025211	lncRNA	0.589	0.334	-1.07	-7.96713	-0.267306
AC025219	lncRNA	0.035	0.00811	4.27	-3.99425	1.76458
AC025244	lncRNA	3.37e-05	4.15e-07	34.8	7.54845	2.43279	up
AC025244	lncRNA	0.96	0.797	-0.271	-8.54261	-0.0210133
AC025252	lncRNA	0.76	0.525	0.683	-8.31856	0.238685
[truncated: 8,770 more rows]
