# Supplementary material for: LINC01936 inhibits the proliferation and metastasis of lung squamous cell carcinoma probably by EMT signaling and immune infiltration
Source: PeerJ journal article supplement (doi:10.7717/peerj.16447), 2023-12-07
Supplement: S3.zip [file TCGA-GSE88862-venn-52DEL.xlsx]

## Sheet: Sheet1
52 common elements in "DEseq2", "edgeR", "Limma" and "GSE88862":
ABCA9-AS1
CASC9
ESRG
FAM83C-AS1
FENDRR
KCNQ5-IT1
LHFPL3-AS2
LINC00165
LINC00626
LINC00640
LINC00844
LINC01116
LINC01117
LINC01133
LINC01166
LINC01290
LINC01305
LINC01412
LINC01513
LINC01564
LINC01612
LINC01616
LINC01633
LINC01705
LINC01752
LINC01765
LINC01807
LINC01827
LINC01863
LINC01905
LINC01936
LINC01977
LINC01985
LINC01996
LINC02016
LINC02041
LINC02163
LINC02178
LINC02473
LSAMP-AS1
LUARIS
MAFA-AS1
MYO16-AS1
PCAT7
PGM5-AS1
SFTA1P
SH3PXD2A-AS1
SLC14A2-AS1
SLC2A1-AS1
SMIM25
SOX21-AS1
TARID

## Sheet: up
29 common elements in "DEseq2", "edgeR", "Limma" and "GSE88862":
CASC9
LINC02163
SLC2A1-AS1
LINC01633
PCAT7
SOX21-AS1
LINC01807
LINC00626
LINC01305
LINC01752
LINC00640
LINC01977
LINC01564
ABCA9-AS1
LUARIS
SH3PXD2A-AS1
LSAMP-AS1
LINC01133
MAFA-AS1
ESRG
LINC01705
LINC01905
LINC01116
LINC02473
LINC02178
LINC02041
FAM83C-AS1
KCNQ5-IT1
LINC01117

## Sheet: down
23 common elements in "DEseq2", "edgeR", "Limma" and "GSE88862":
FENDRR
LINC01290
SMIM25
SFTA1P
LINC01936
LINC02016
LHFPL3-AS2
PGM5-AS1
LINC01412
LINC01996
LINC01985
LINC01863
SLC14A2-AS1
LINC00844
TARID
MYO16-AS1
LINC01765
LINC01513
LINC01612
LINC01827
LINC01166
LINC01616
LINC00165

## Sheet: 23down
gene	AveExpr	logFC	adj.P.Val
SMIM25	9.30862	-3.6169	1.04258e-85
FENDRR	7.99779	-4.984	2.1291e-106
SFTA1P	7.35938	-6.04306	3.9338e-119
LINC01936	6.69895	-4.15426	6.12426e-82
LHFPL3-AS2	6.13435	-5.7244	1.73289e-92
TARID	4.90493	-3.88675	1.11341e-66
LINC01290	3.99763	-2.64172	8.1296e-64
MYO16-AS1	3.5839	-4.34793	6.88857e-64
LINC01612	2.82587	-4.32268	2.92381e-64
LINC01996	2.33345	-6.56925	3.8384e-153
LINC01765	2.09799	-4.13627	7.64421e-51
LINC01513	1.9285	-2.80547	1.217e-28
LINC02016	1.62587	-6.4785	2.8218e-147
LINC01827	1.53915	-3.3599	2.88571e-45
LINC01166	1.4732	-3.36336	1.6547e-40
LINC00165	1.41774	-3.34619	1.32907e-32
LINC01863	1.37739	-5.16016	3.5722e-119
PGM5-AS1	1.32284	-4.19579	8.79335e-90
LINC01412	1.29738	-2.78518	1.82096e-40
SLC14A2-AS1	1.29325	-2.82497	3.08265e-42
LINC01985	1.0341	-3.31691	1.2752e-59
LINC00844	0.952146	-3.56851	7.56406e-67
LINC01616	0.803965	-3.10152	5.8945e-40
