# Supplementary material for: LINC01936 inhibits the proliferation and metastasis of lung squamous cell carcinoma probably by EMT signaling and immune infiltration
Source: PeerJ journal article supplement (doi:10.7717/peerj.16447), 2023-12-07
Supplement: S5.zip [file GO_KEGG.xlsx]

## Sheet: BP
Category	Term		PValue	Fold Enrichment	Bonferroni	Benjamini	FDR
GOTERM_BP_DIRECT	GO:0030198	extracellular matrix organization	6.25e-08	6.09497	0.000107	5.35e-05	5.27e-05
GOTERM_BP_DIRECT	GO:0045766	positive regulation of angiogenesis	3.7e-06	5.61648	0.0063218	0.00158546	0.00156138
GOTERM_BP_DIRECT	GO:0007160	cell-matrix adhesion	2.36e-05	6.50037	0.0395528	0.00807116	0.00794859
GOTERM_BP_DIRECT	GO:0016525	negative regulation of angiogenesis	7.87e-05	5.57906	0.12602	0.0200917	0.0197866
GOTERM_BP_DIRECT	GO:0007179	transforming growth factor beta receptor signaling pathway	9.02e-05	6.31372	0.143046	0.0200917	0.0197866
GOTERM_BP_DIRECT	GO:0010811	positive regulation of cell-substrate adhesion	0.00014	11.809	0.21294	0.0208541	0.0205374
GOTERM_BP_DIRECT	GO:0019722	calcium-mediated signaling	0.000319	6.16122	0.42048	0.0358654	0.0353207
GOTERM_BP_DIRECT	GO:0019934	cGMP-mediated signaling	0.000448	13.6258	0.535718	0.0368212	0.036262
GOTERM_BP_DIRECT	GO:0018108	peptidyl-tyrosine phosphorylation	0.000452	7.0854	0.538567	0.0368212	0.036262

## Sheet: CC
Category	Term		PValue	Fold Enrichment	Bonferroni	Benjamini	FDR
GOTERM_CC_DIRECT	GO:0009897	external side of plasma membrane	3.18e-07	3.56593	8.2e-05	1.37e-05	1.23e-05
GOTERM_CC_DIRECT	GO:0005925	focal adhesion	1.13e-05	3.31182	0.00290492	0.000364	0.000327
GOTERM_CC_DIRECT	GO:0045121	membrane raft	0.000732	3.47132	0.172217	0.0157446	0.0141579
GOTERM_CC_DIRECT	GO:0042383	sarcolemma	0.000796	5.2989	0.185642	0.0157903	0.014199
GOTERM_CC_DIRECT	GO:0031089	platelet dense granule lumen	0.000893	20.2494	0.205829	0.0164538	0.0147957
GOTERM_CC_DIRECT	GO:0005581	collagen trimer	0.00201169	5.33452	0.405205	0.0346011	0.0311141
GOTERM_CC_DIRECT	GO:0005604	basement membrane	0.00224097	5.22221	0.43944	0.0360999	0.0324619
GOTERM_CC_DIRECT	GO:0005923	bicellular tight junction	0.00245456	4.36141	0.469563	0.0360999	0.0324619
GOTERM_CC_DIRECT	GO:0031093	platelet alpha granule lumen	0.0025186	6.34682	0.478277	0.0360999	0.0324619
GOTERM_CC_DIRECT	GO:0001725	stress fiber	0.00344757	5.90607	0.589758	0.0468143	0.0420966

## Sheet: MF
Category	Term		PValue	Fold Enrichment	Bonferroni	Benjamini	FDR
GOTERM_MF_DIRECT	GO:0005201	extracellular matrix structural constituent	1.1928e-09	8.13527	5.63002e-07	2.81501e-07	2.77326e-07
GOTERM_MF_DIRECT	GO:0005178	integrin binding	8.92057e-05	4.88502	0.0412328	0.00842101	0.00829613
GOTERM_MF_DIRECT	GO:0038187	pattern recognition receptor activity	0.00459503	11.6944	0.886261	0.180738	0.178057
GOTERM_MF_DIRECT	GO:0005024	transforming growth factor beta-activated receptor activity	0.00838426	21.05	0.981203	0.227055	0.223688
GOTERM_MF_DIRECT	GO:0019838	growth factor binding	0.0154114	7.58559	0.999345	0.34639	0.341253
GOTERM_MF_DIRECT	GO:0030169	low-density lipoprotein particle binding	0.0264595	11.6944	0.999997	0.531902	0.524013
GOTERM_MF_DIRECT	GO:0004950	chemokine receptor activity	0.0292997	11.0789	0.999999	0.531902	0.524013
GOTERM_MF_DIRECT	GO:0019957	C-C chemokine binding	0.0451577	8.77083	1	0.73498	0.72408
GOTERM_MF_DIRECT	GO:0023026	MHC class II protein complex binding	0.0596167	7.51786	1	0.848077	0.835499
GOTERM_MF_DIRECT	GO:0001664	G-protein coupled receptor binding	0.0801314	3.95305	1	1	0.987261

## Sheet: KEGG
Category	Term		PValue	Fold Enrichment	Bonferroni	Benjamini	FDR
KEGG_PATHWAY	hsa04514	Cell adhesion molecules	5.45e-05	4.5887	0.0120786	0.0121518	0.0119883
KEGG_PATHWAY	hsa04270	Vascular smooth muscle contraction	0.000363	4.48026	0.0777087	0.0404398	0.0398957
KEGG_PATHWAY	hsa00590	Arachidonic acid metabolism	0.00326061	5.90513	0.517273	0.242372	0.239111
KEGG_PATHWAY	hsa05414	Dilated cardiomyopathy	0.00503979	4.37759	0.675904	0.280968	0.277189
KEGG_PATHWAY	hsa04022	cGMP-PKG signaling pathway	0.00639746	3.23544	0.760982	0.285327	0.281488
KEGG_PATHWAY	hsa05412	Arrhythmogenic right ventricular cardiomyopathy	0.0087799	4.67809	0.860063	0.32632	0.32193
KEGG_PATHWAY	hsa04670	Leukocyte transendothelial migration	0.0113996	3.68639	0.92244	0.363158	0.358273
KEGG_PATHWAY	hsa05416	Viral myocarditis	0.0171013	5.00296	0.978647	0.390159	0.384911
