# Supplementary material for: LINC01936 inhibits the proliferation and metastasis of lung squamous cell carcinoma probably by EMT signaling and immune infiltration
Source: PeerJ journal article supplement (doi:10.7717/peerj.16447), 2023-12-07
Supplement: S8.zip [file qRT-PCR OV-SiRNA LINC01936 in H1703 KNS62(2)(1)(1).xlsx]

## Sheet: Sheet1
NCI-H1703	LINC01936	GAPDH	△Ct	average	SD	△△Ct	average	SD	2-△△Ct	average	SD	t test
control	36.6496	15.1182	21.5314	20.3012	1.10965	1.23027	0	1.10965	0.426237	1.18689	0.737557	p value
	34.614	15.238	19.376			-0.925201			1.89895			0.000653174
	35.415	15.4189	19.9961			-0.30507			1.23548
treatment(ov)	30.6874	14.8332	15.8542	15.8825	0.244912	-4.44691	-4.4187	0.244912	21.8098	21.5915	3.59951
	30.9437	14.8035	16.1403			-4.1609			17.8878
	30.5782	14.9253	15.6529			-4.64829			25.0769
NCI-H1703	LINC01936	GAPDH	△Ct	average	SD	△△Ct	average	SD	2-△△Ct	average	SD	t test
control	29.9602	17.0219	12.9383	12.7997	0.120823	0.138658	-1.77636e-15	0.120823	0.908364	1.0023	0.0819333	p value
	29.6616	16.9446	12.717			-0.0826957			1.05899			0.0280826
	29.6849	16.9412	12.7437			-0.0559627			1.03955
siRNA-136	29.877	16.2767	13.6003	13.3149	0.266782	0.800619	0.51524	0.266782	0.574103	0.70756	0.127497
	29.4286	16.3568	13.0718			0.272094			0.828117
	29.4413	16.1686	13.2727			0.473006			0.720462
siRNA-478	30.6607	17.0219	13.6388	13.697	0.218049	0.839099	0.897314	0.218049	0.558992	0.540905	0.0792129	p value
	30.8829	16.9446	13.9382			1.13856			0.454212			0.00217756
	30.4552	16.9412	13.514			0.71428			0.609509
KNS-62	LINC01936	GAPDH	△Ct	average	SD	△△Ct	average	SD	2-△△Ct	average	SD	t test
control	28.59	18.95	9.64	10	0.476235	-0.36	0	0.476235	1.28343	1.03469	0.309729	p value
	28.81	18.99	9.82			-0.18			1.13288			0.00129735
	29.24	18.7	10.54			0.54			0.687771
treatment(OV)	19.45	17.28	2.17	1.91	0.301164	-7.83	-8.09	0.301164	227.544	276.542	59.3315
	19.47	17.89	1.58			-8.42			342.509
	19.47	17.49	1.98			-8.02			259.574
KNS-62	LINC01936	GAPDH	△Ct	average	SD	△△Ct	average	SD	2-△△Ct	average	SD	t test
control	29.43	19.64	9.79	9.91	0.144222	-0.12	-5.92119e-16	0.144222	1.08673	1.00329	0.0982358	p value
	29.6	19.53	10.07			0.16			0.895025			0.00700209
	29.46	19.59	9.87			-0.04			1.02811
siRNA-136	29.93	17.64	12.29	11.5467	0.794124	2.38	1.63667	0.794124	0.192109	0.35597	0.196865
	29.68	18.04	11.64			1.73			0.301452
	28.75	18.04	10.71			0.8			0.574349
siRNA-478	26.46	17.84	8.62	7.97667	0.566951	-1.29	-1.93333	0.566951	2.44528	4.00575	1.39543	p value
	25.92	18.16	7.76			-2.15			4.43828			0.0205181
	25.7	18.15	7.55			-2.36			5.1337
