# Supplementary figures and images for: LINC01936 inhibits the proliferation and metastasis of lung squamous cell carcinoma probably by EMT signaling and immune infiltration
Source: PeerJ journal article supplement (doi:10.7717/peerj.16447), 2023-12-07

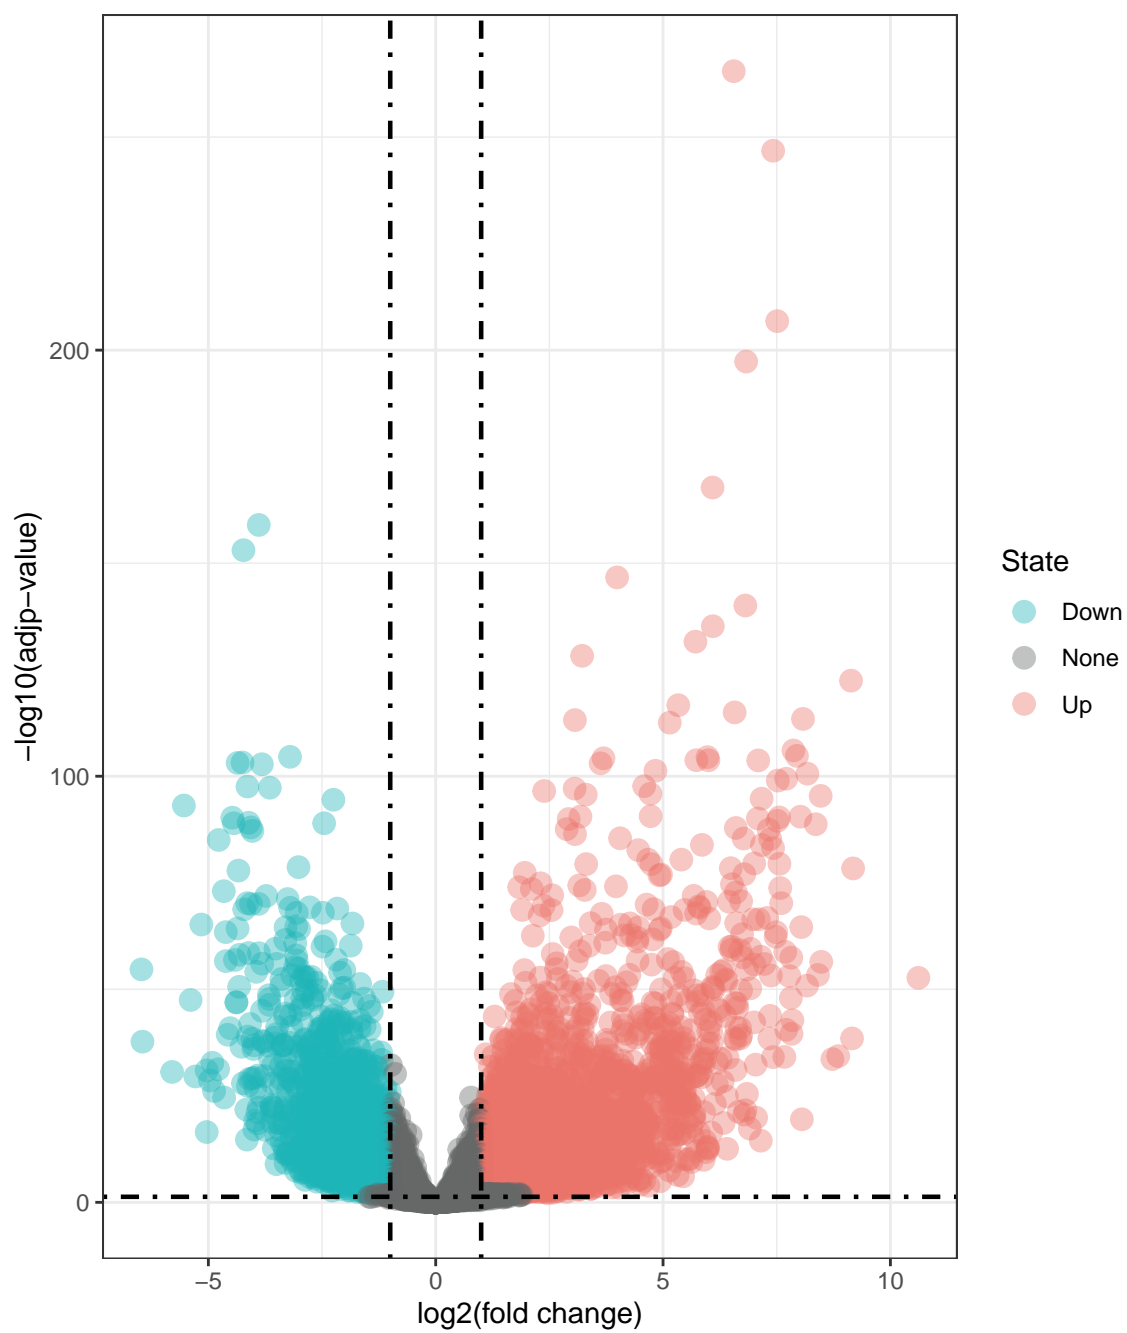

Supplement: S1.zip [file DESeq2_volcano.pdf › S1.TCGA differentially expressed genes/02.Three Volcano map/DEseq2-vol/DEseq2-vol/DESeq2_volcano.pdf]

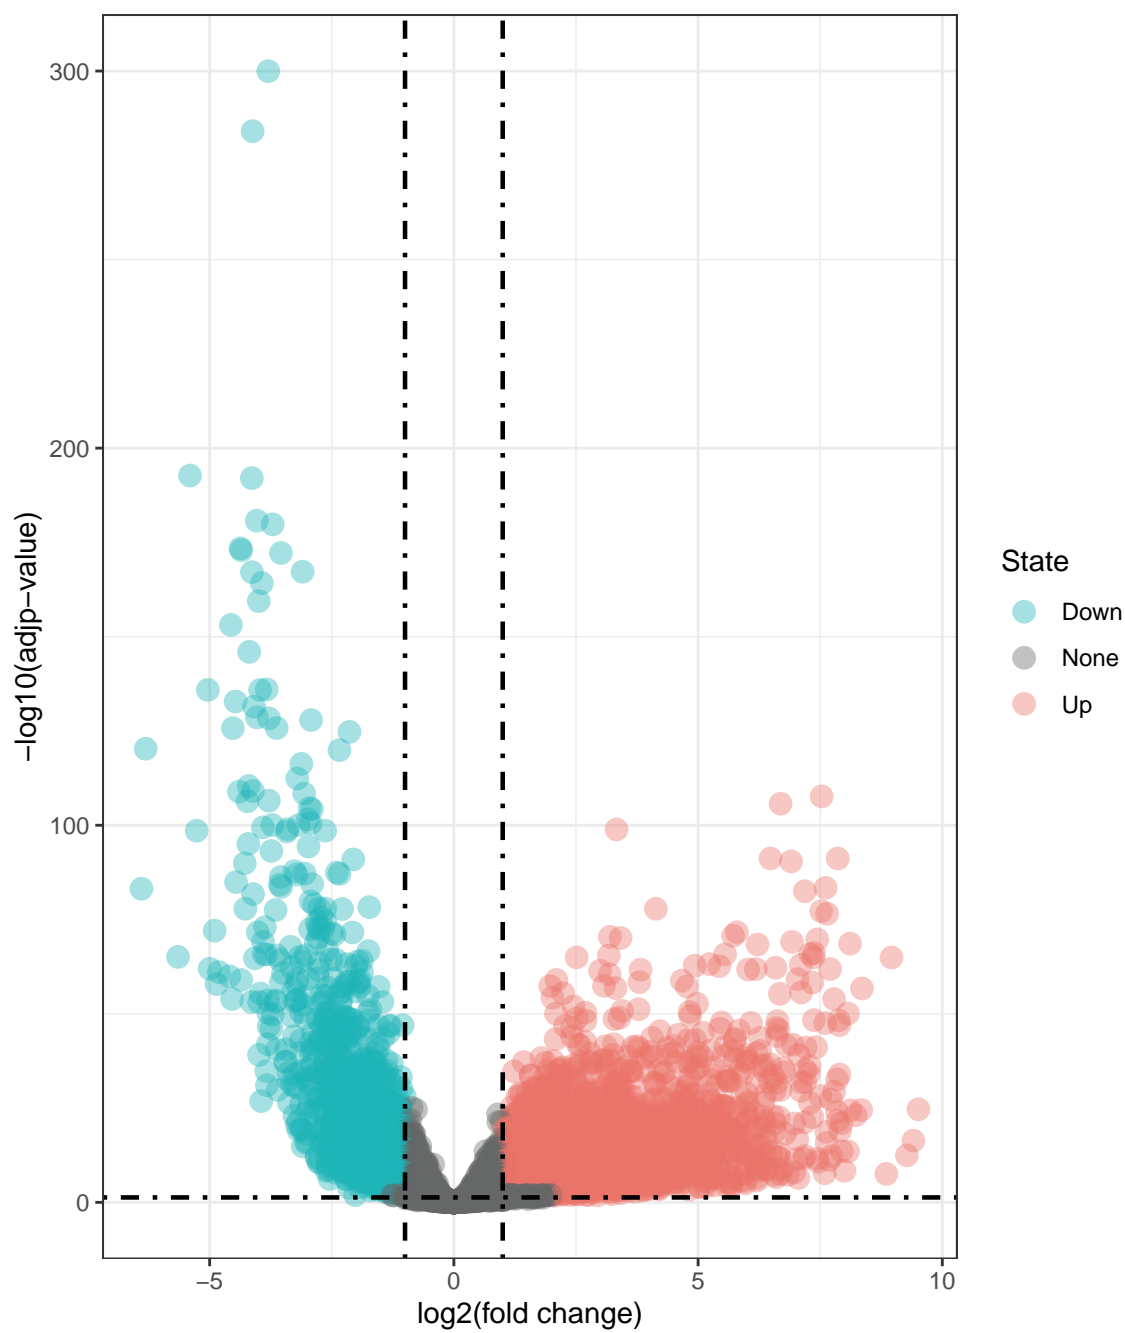

Supplement: S1.zip [file edgeR_volcano.pdf › S1.TCGA differentially expressed genes/02.Three Volcano map/edger-vol/edger-vol/edgeR_volcano.pdf]

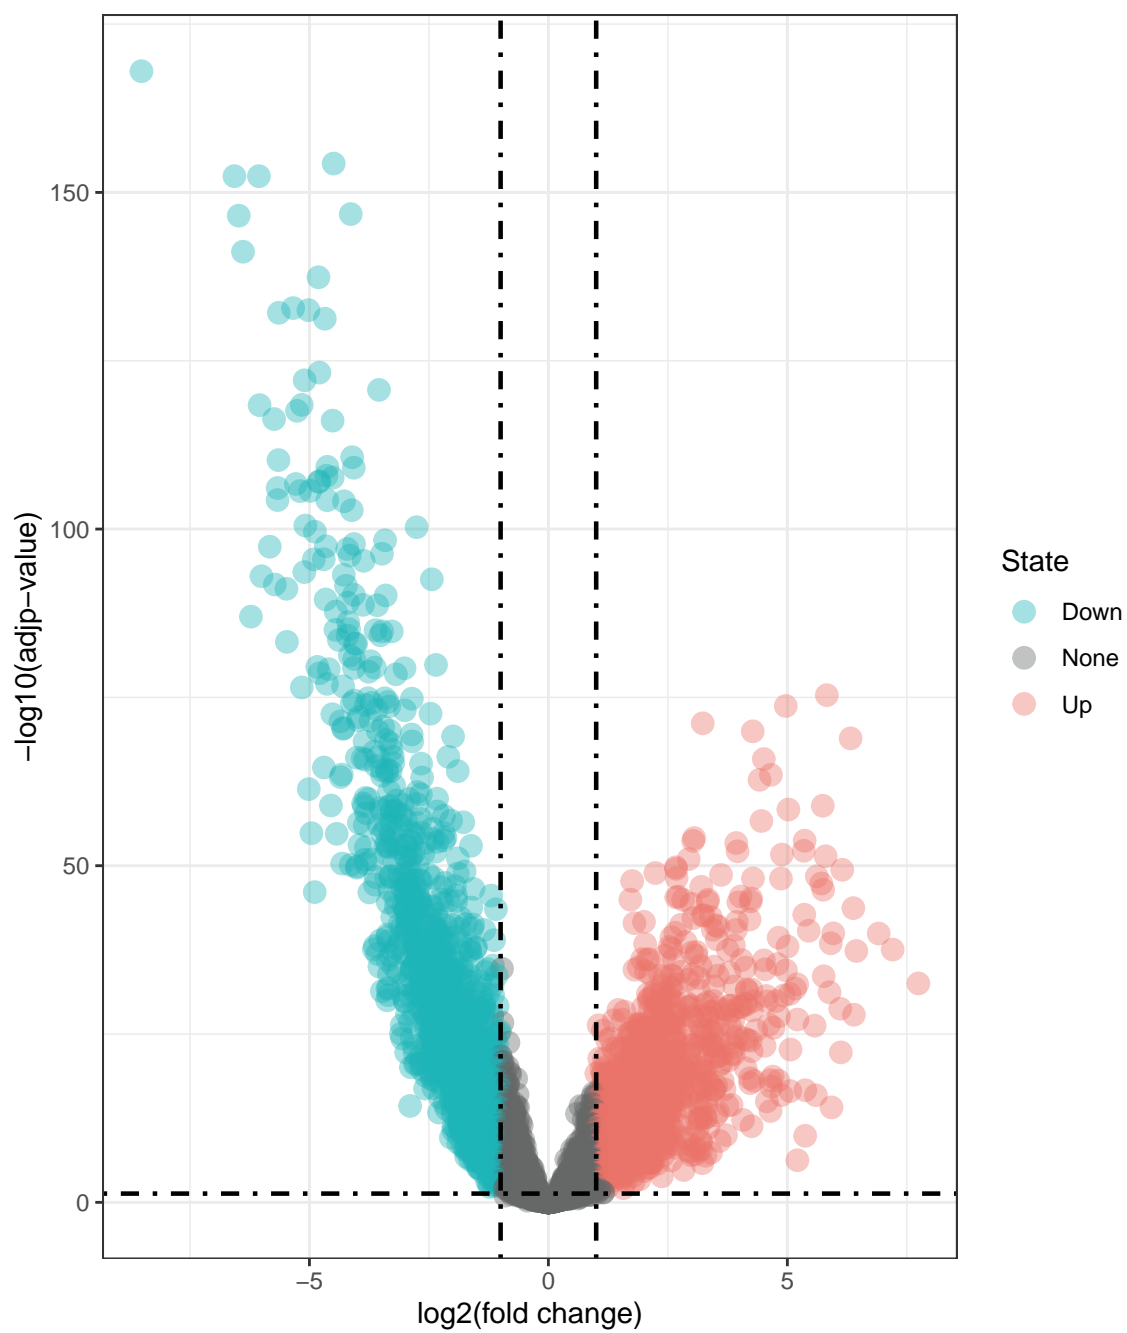

Supplement: S1.zip [file limma_volcano.pdf › S1.TCGA differentially expressed genes/02.Three Volcano map/limma-vol/limma-vol/limma_volcano.pdf]

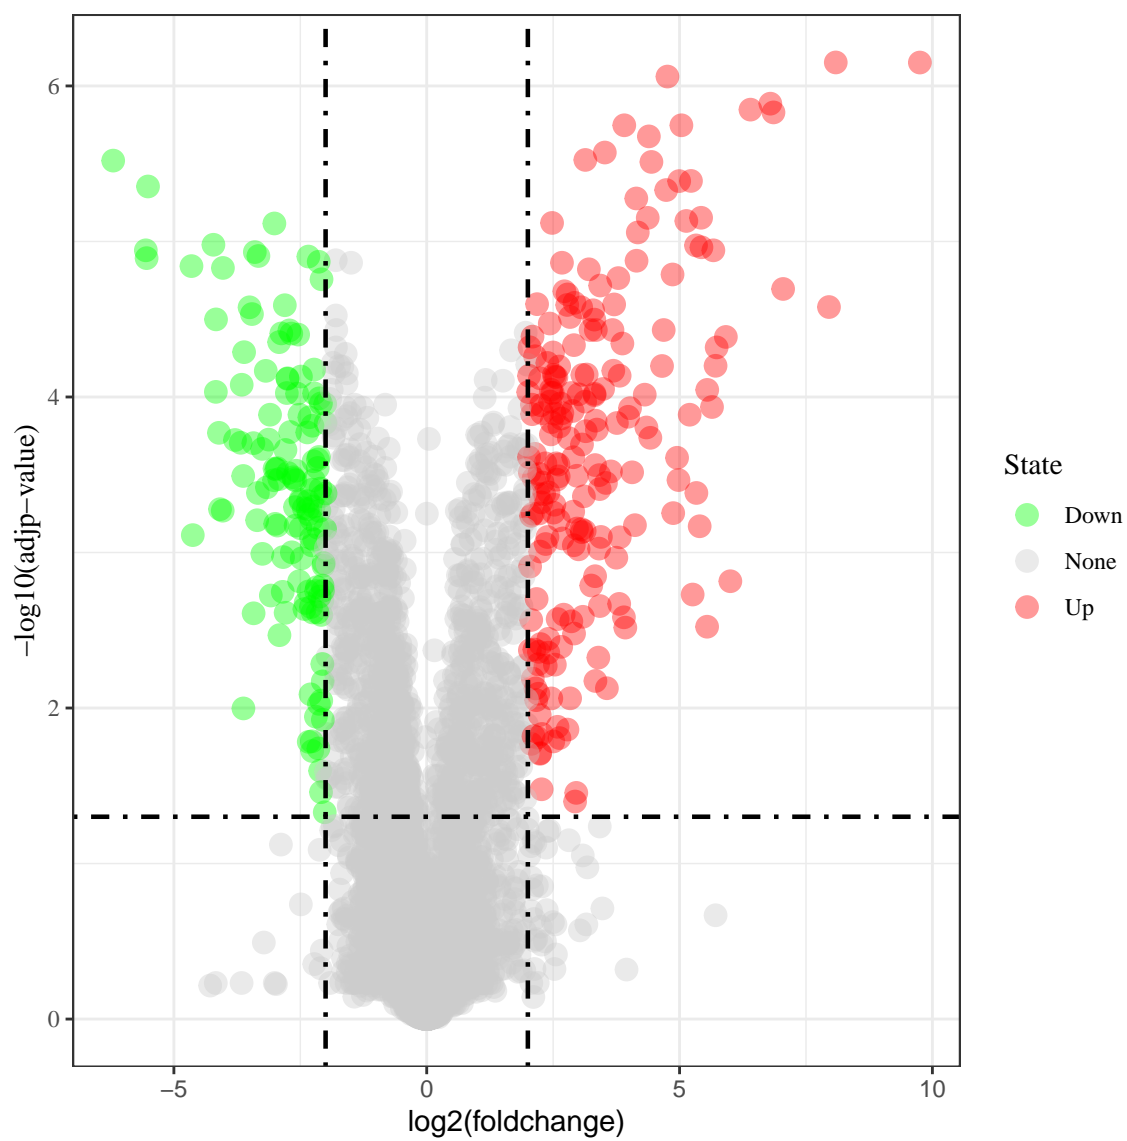

Supplement: S2.zip [file volcano.pdf › GSE88862-limma-vol/volcano.pdf]

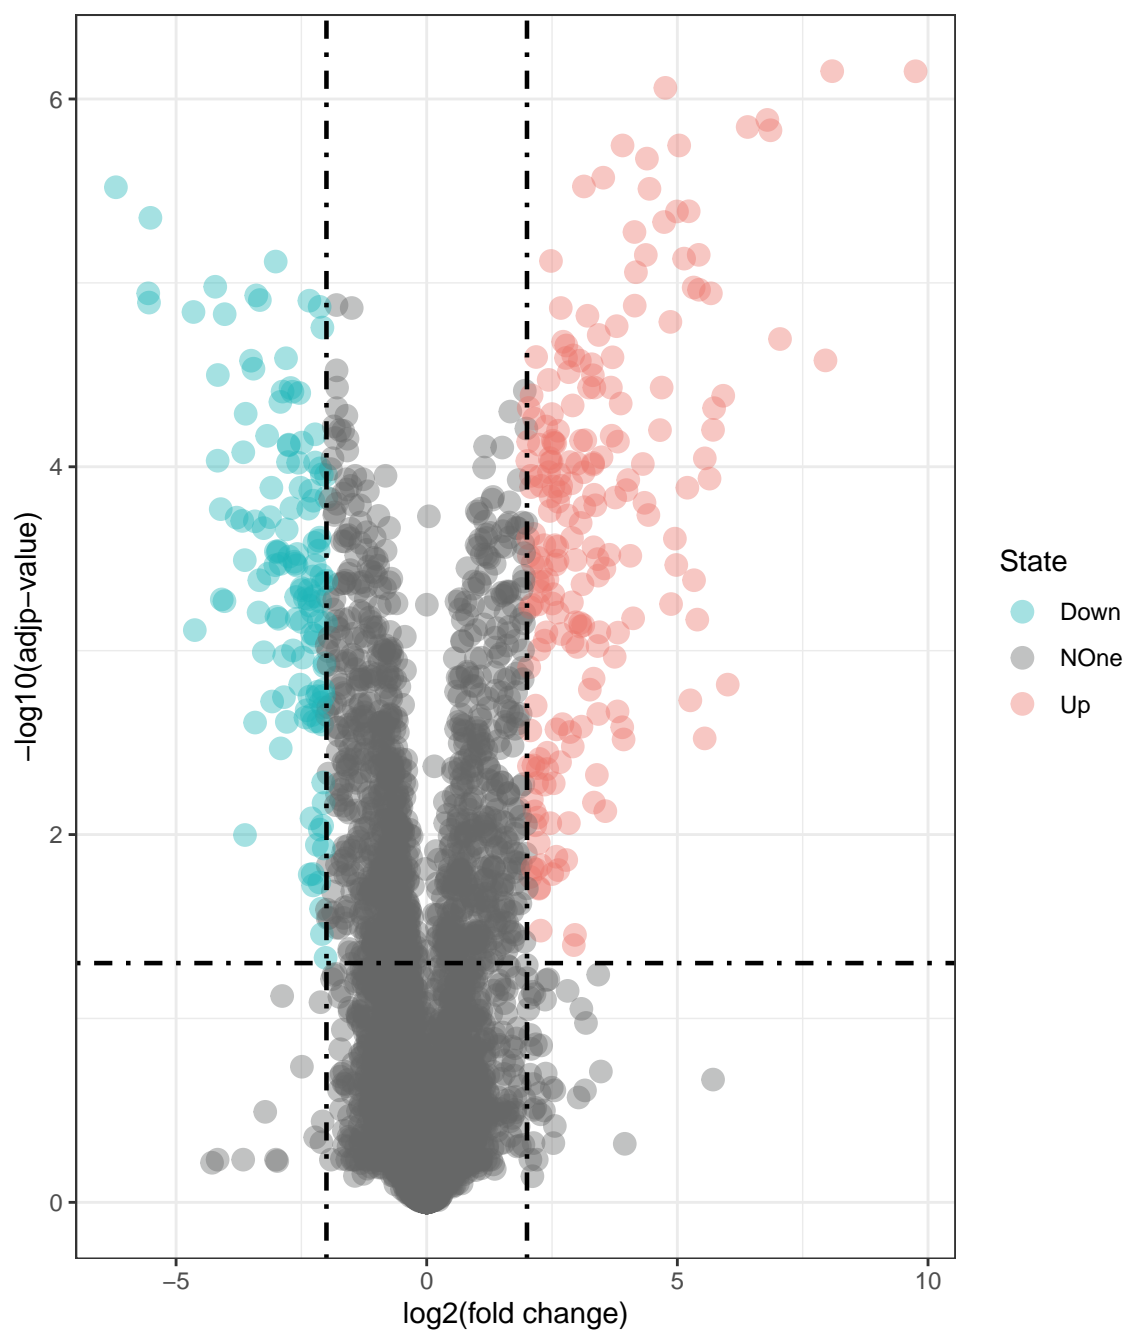

Supplement: S2.zip [file GSE88862_volcano.pdf › S2.GSE88862 differentially expressed genes/GSE88862_volcano.pdf]

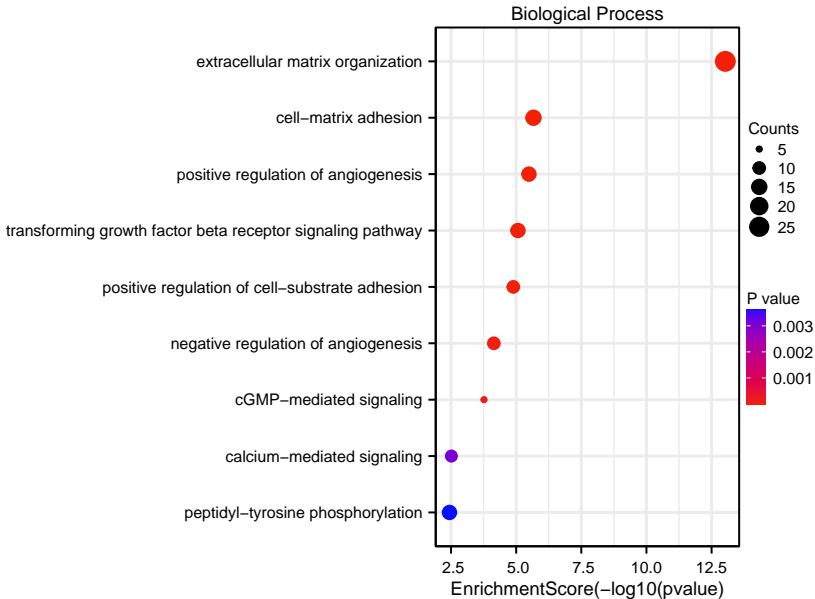

Supplement: S5.zip [file BP.pdf › S5. KEGG GO GSVA/BP.pdf]

# Cellular Component

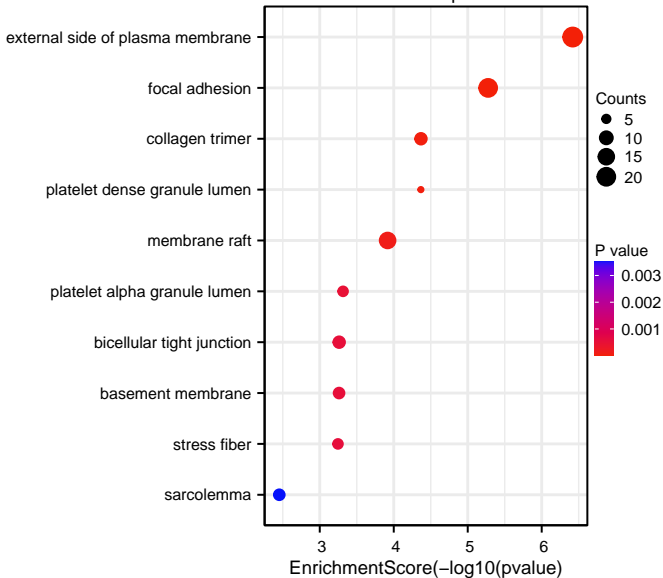

Supplement: S5.zip [file CC.pdf › S5. KEGG GO GSVA/CC.pdf]

A

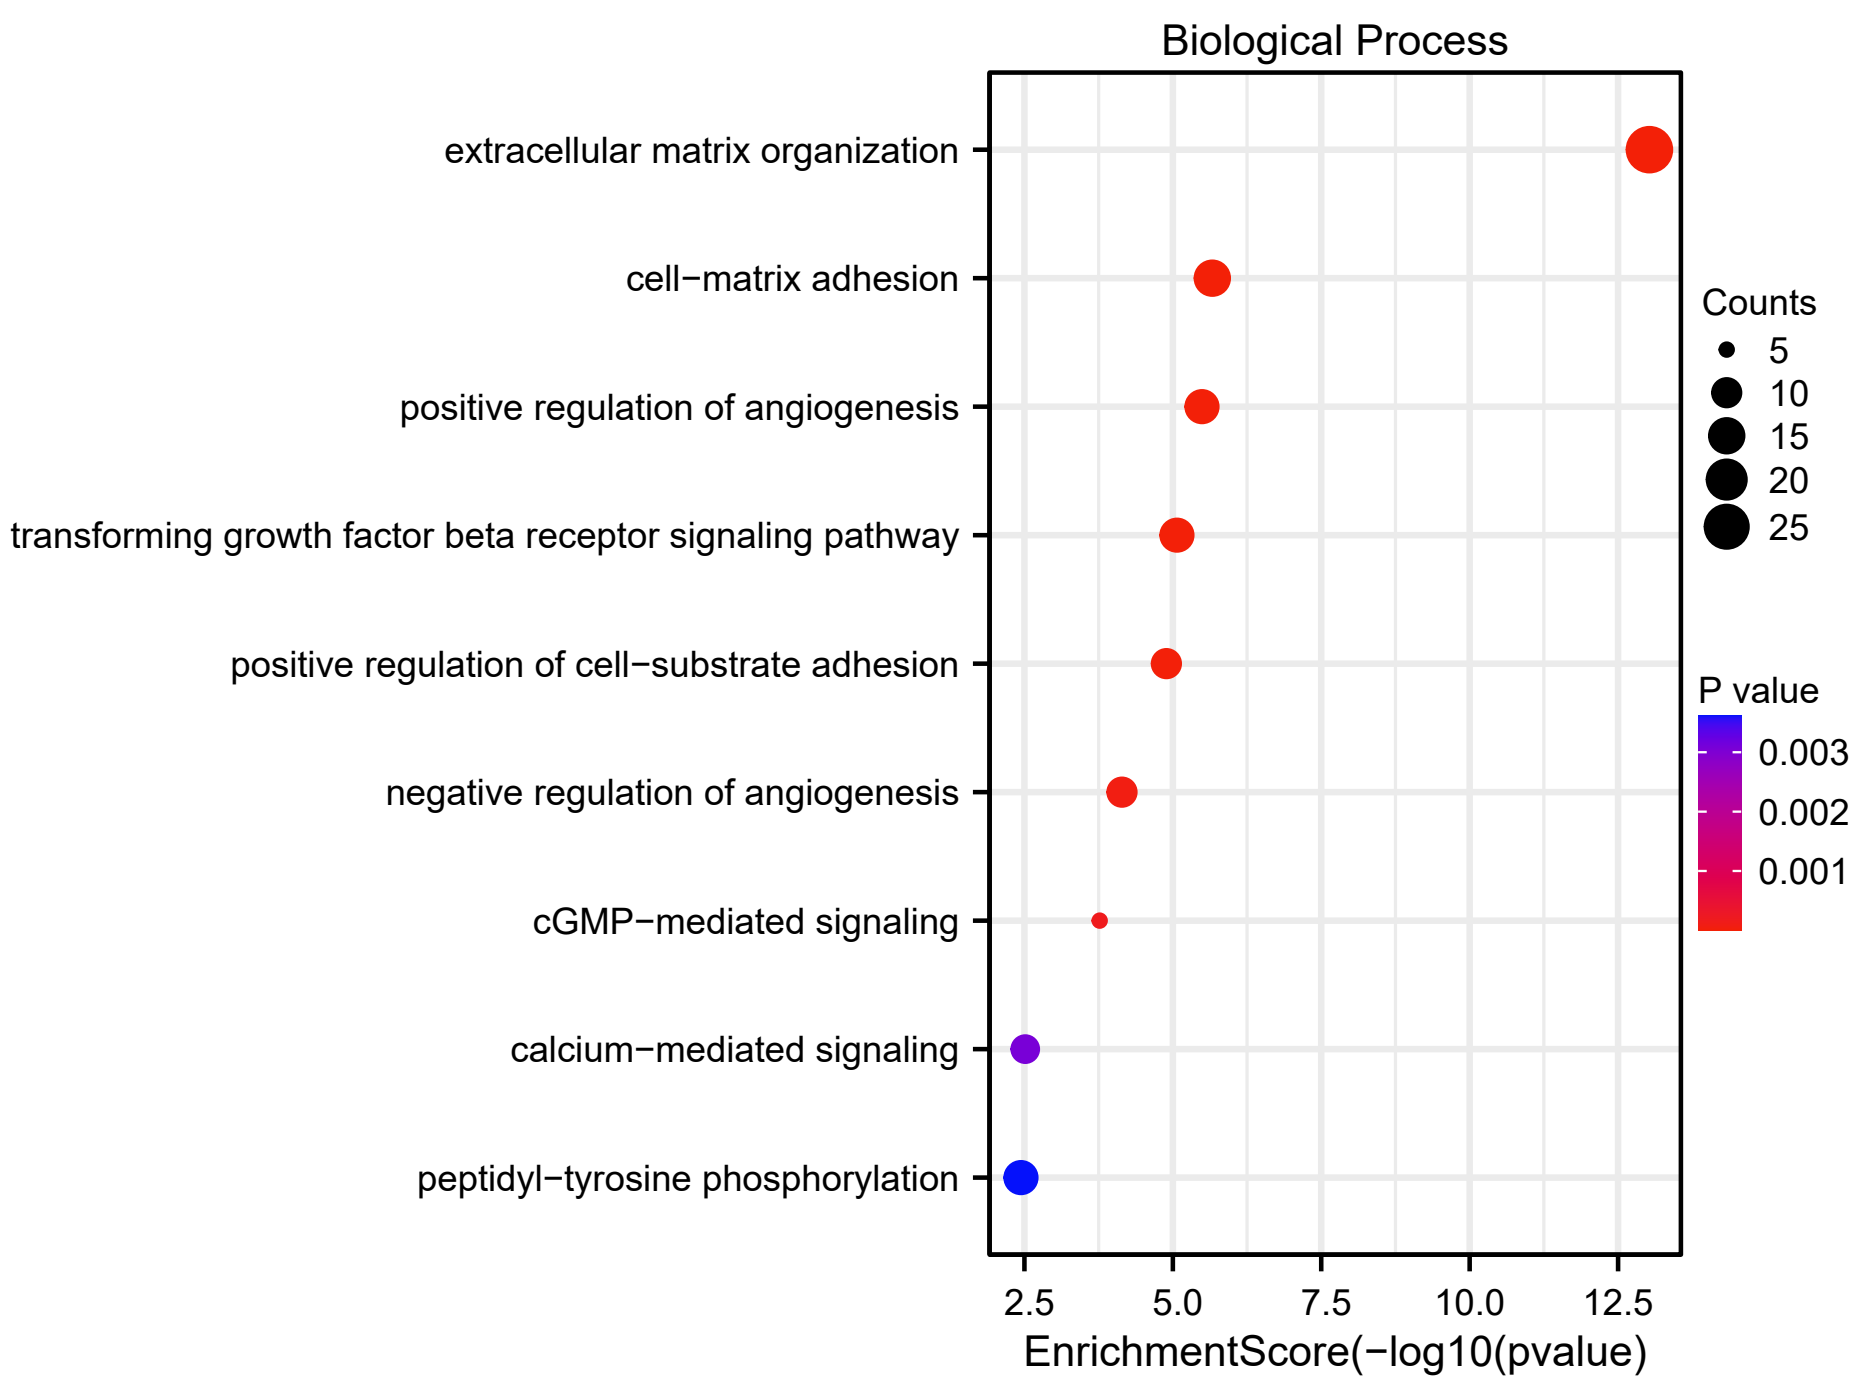

B

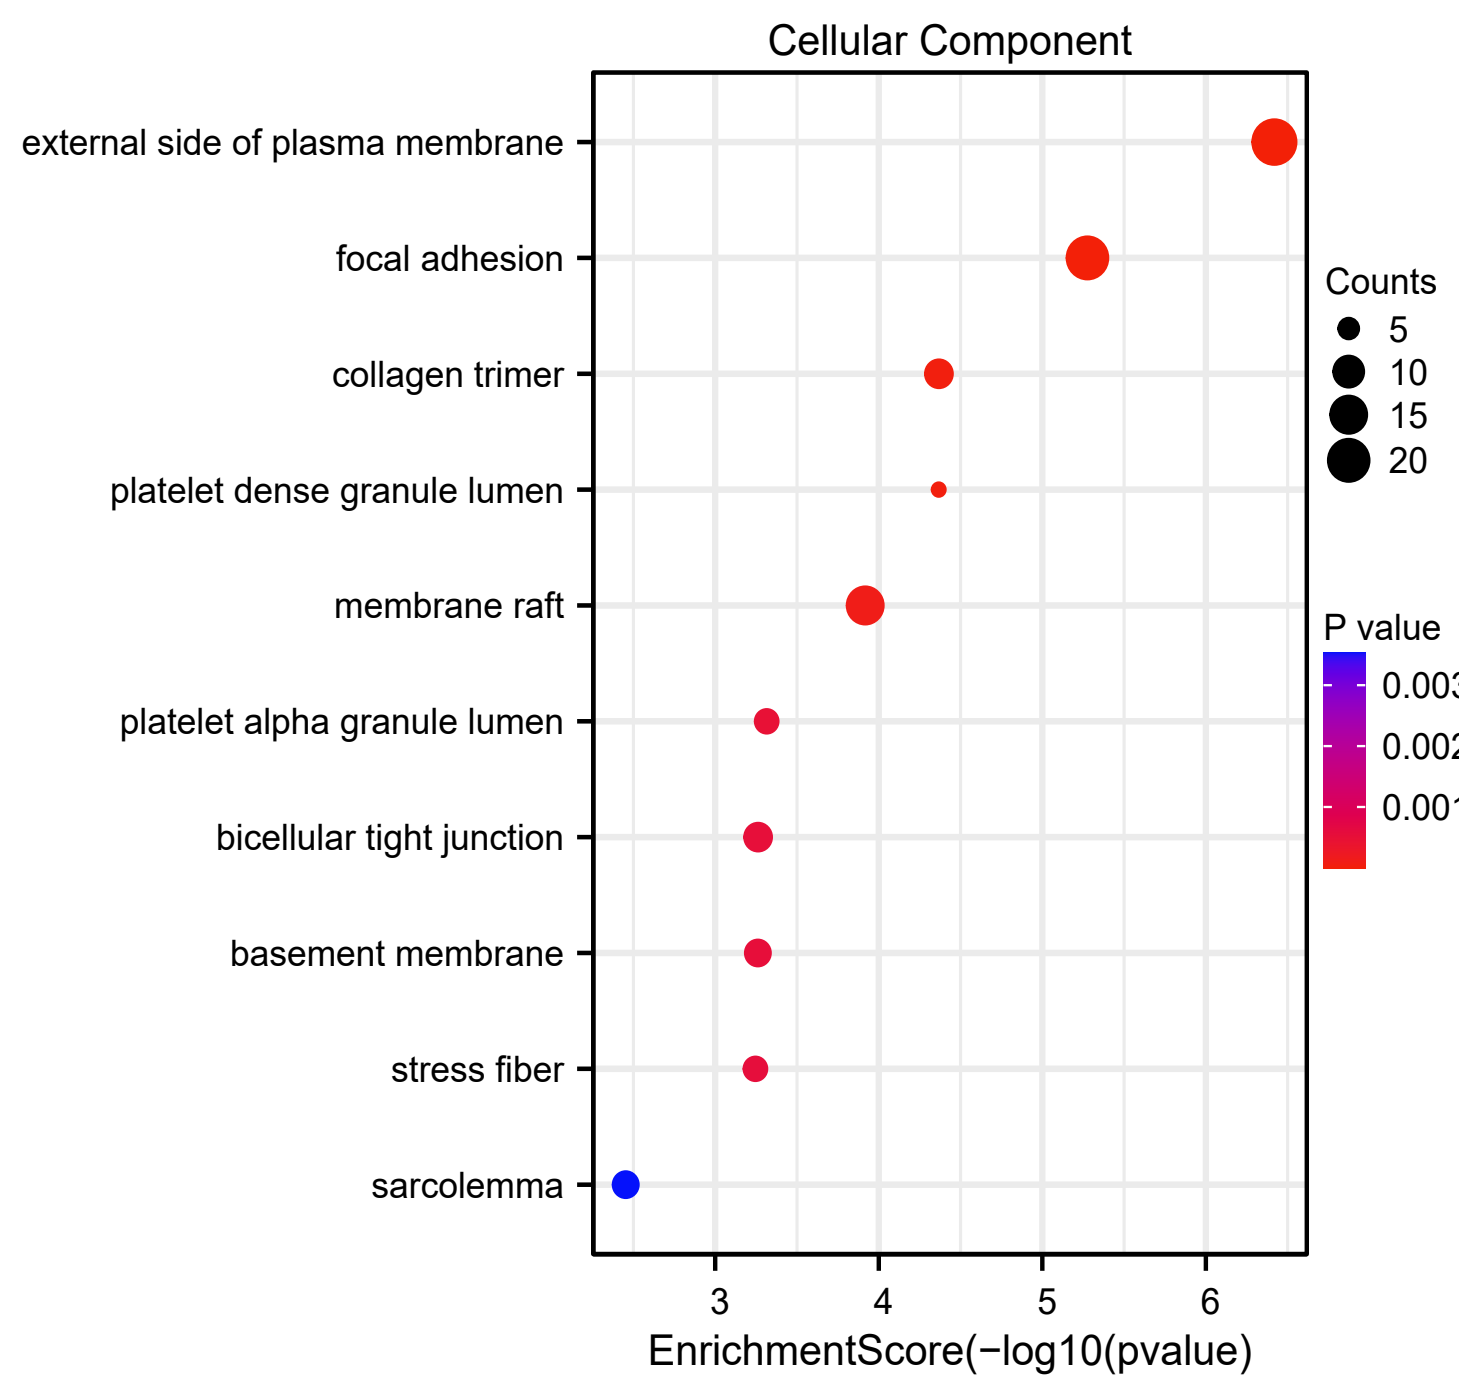

C

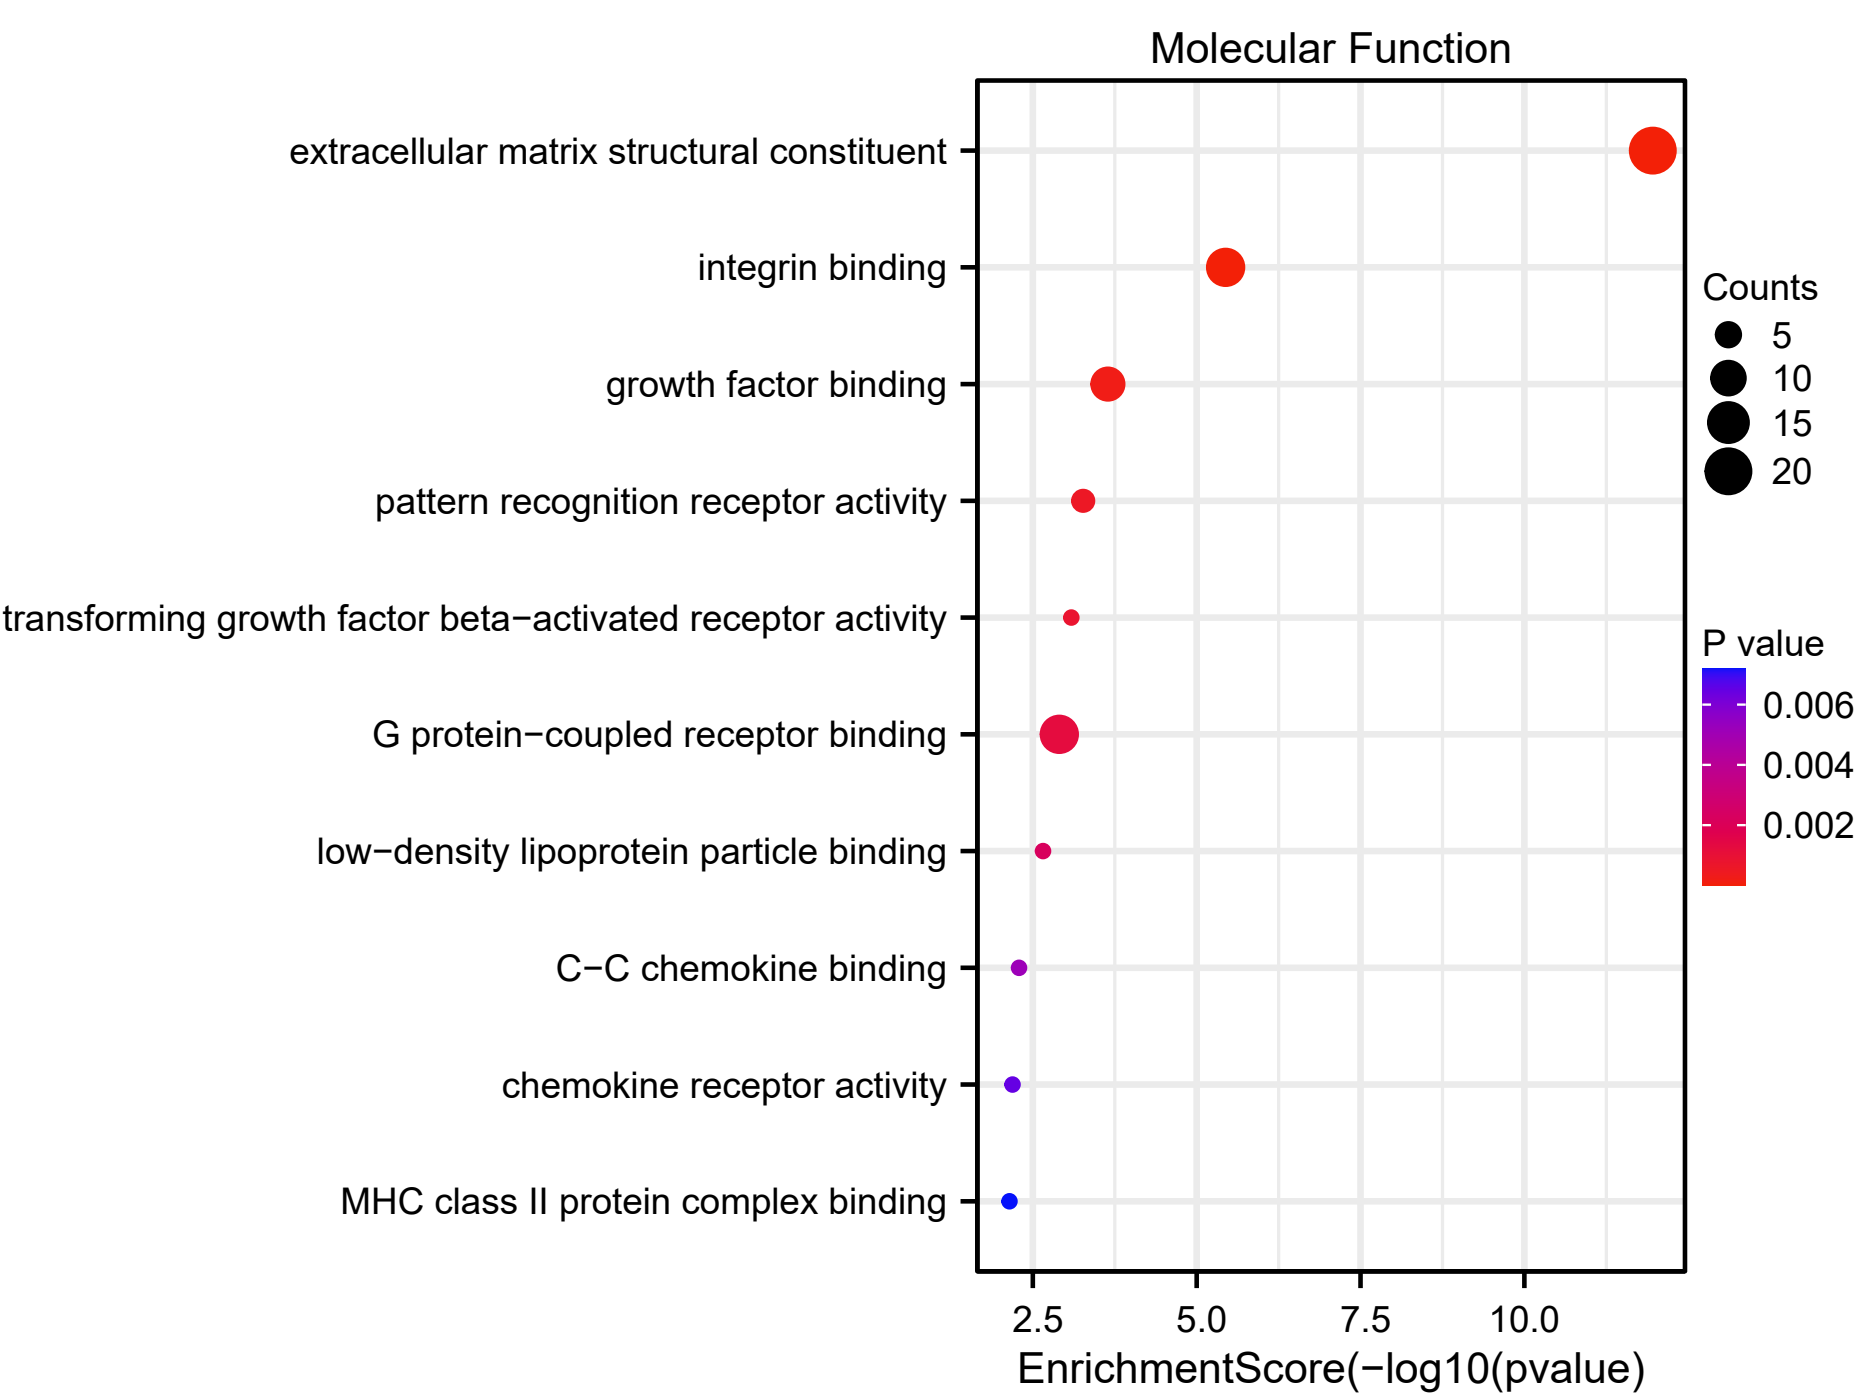

D

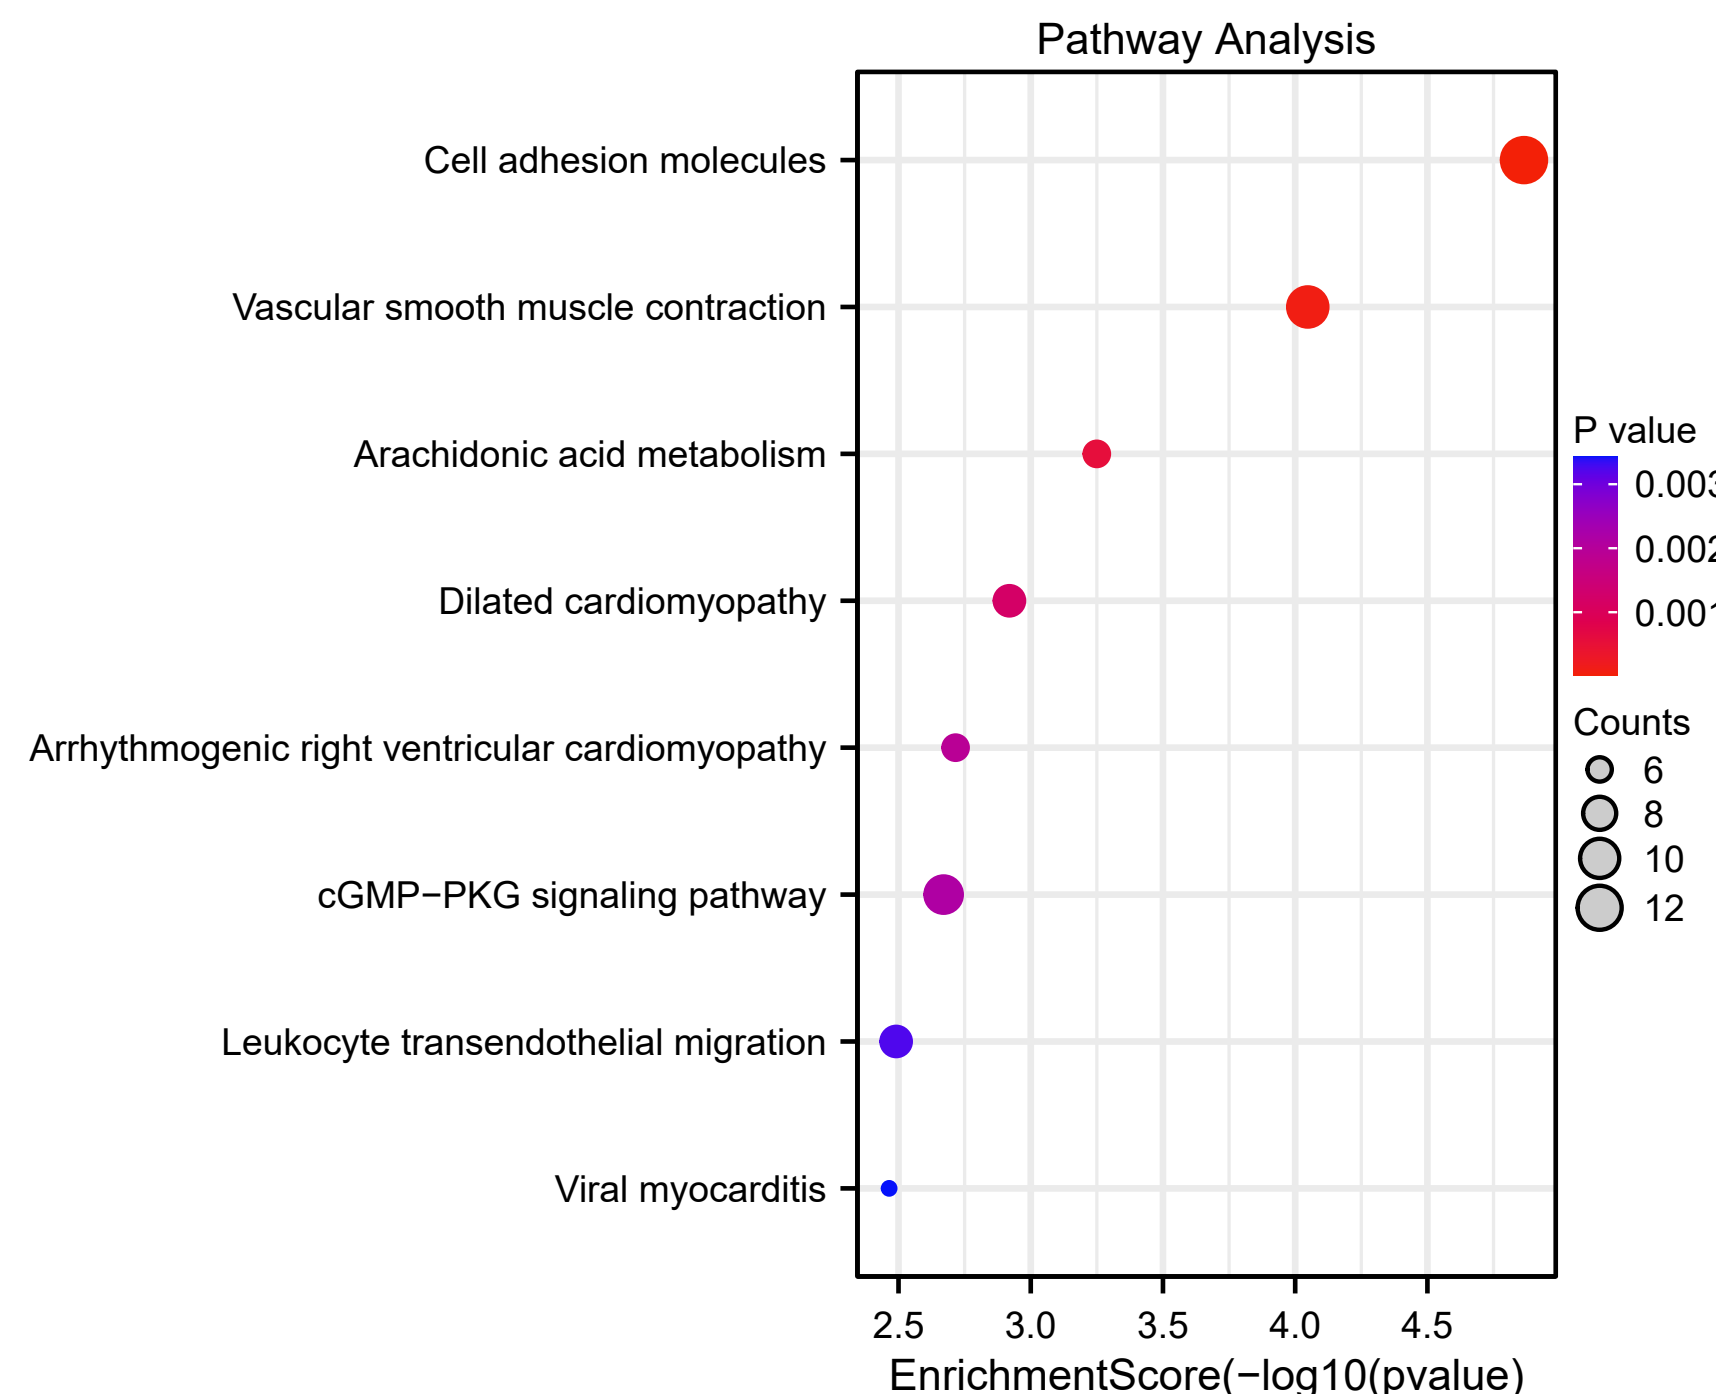

E

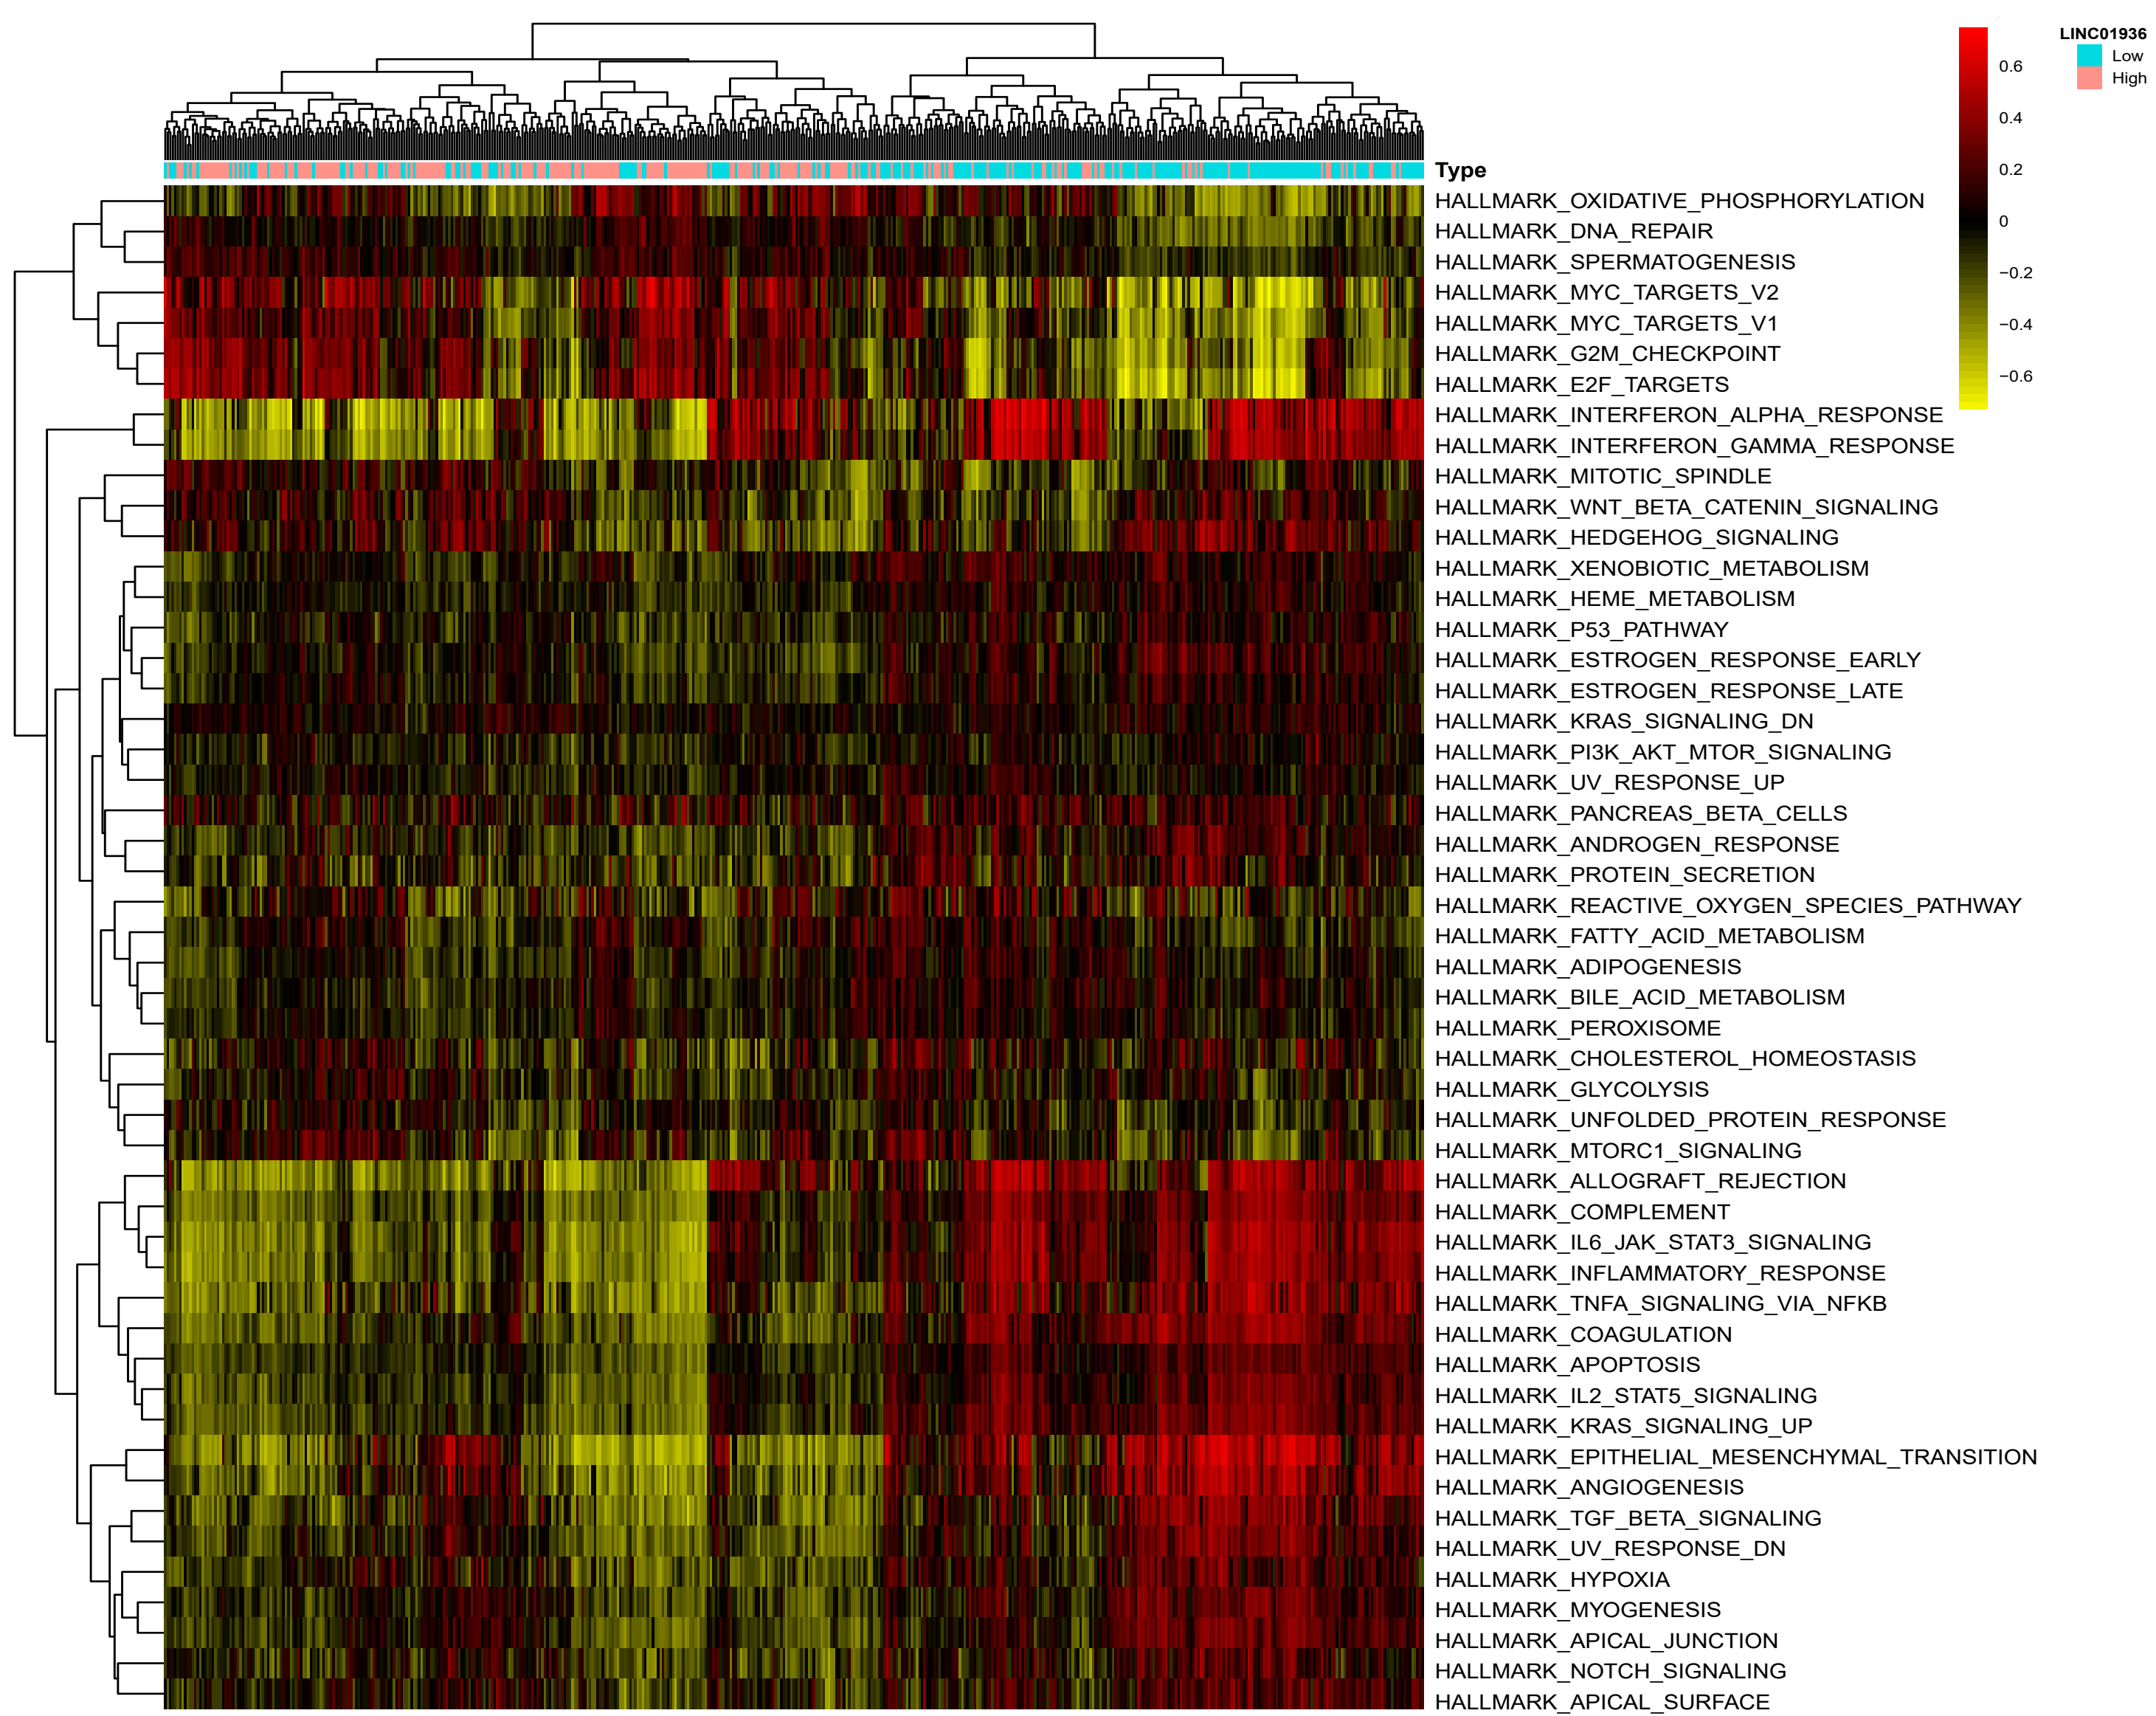

Supplement: S5.zip [file GO KEGG GSVA.pdf › S5. KEGG GO GSVA/GO KEGG GSVA.pdf]

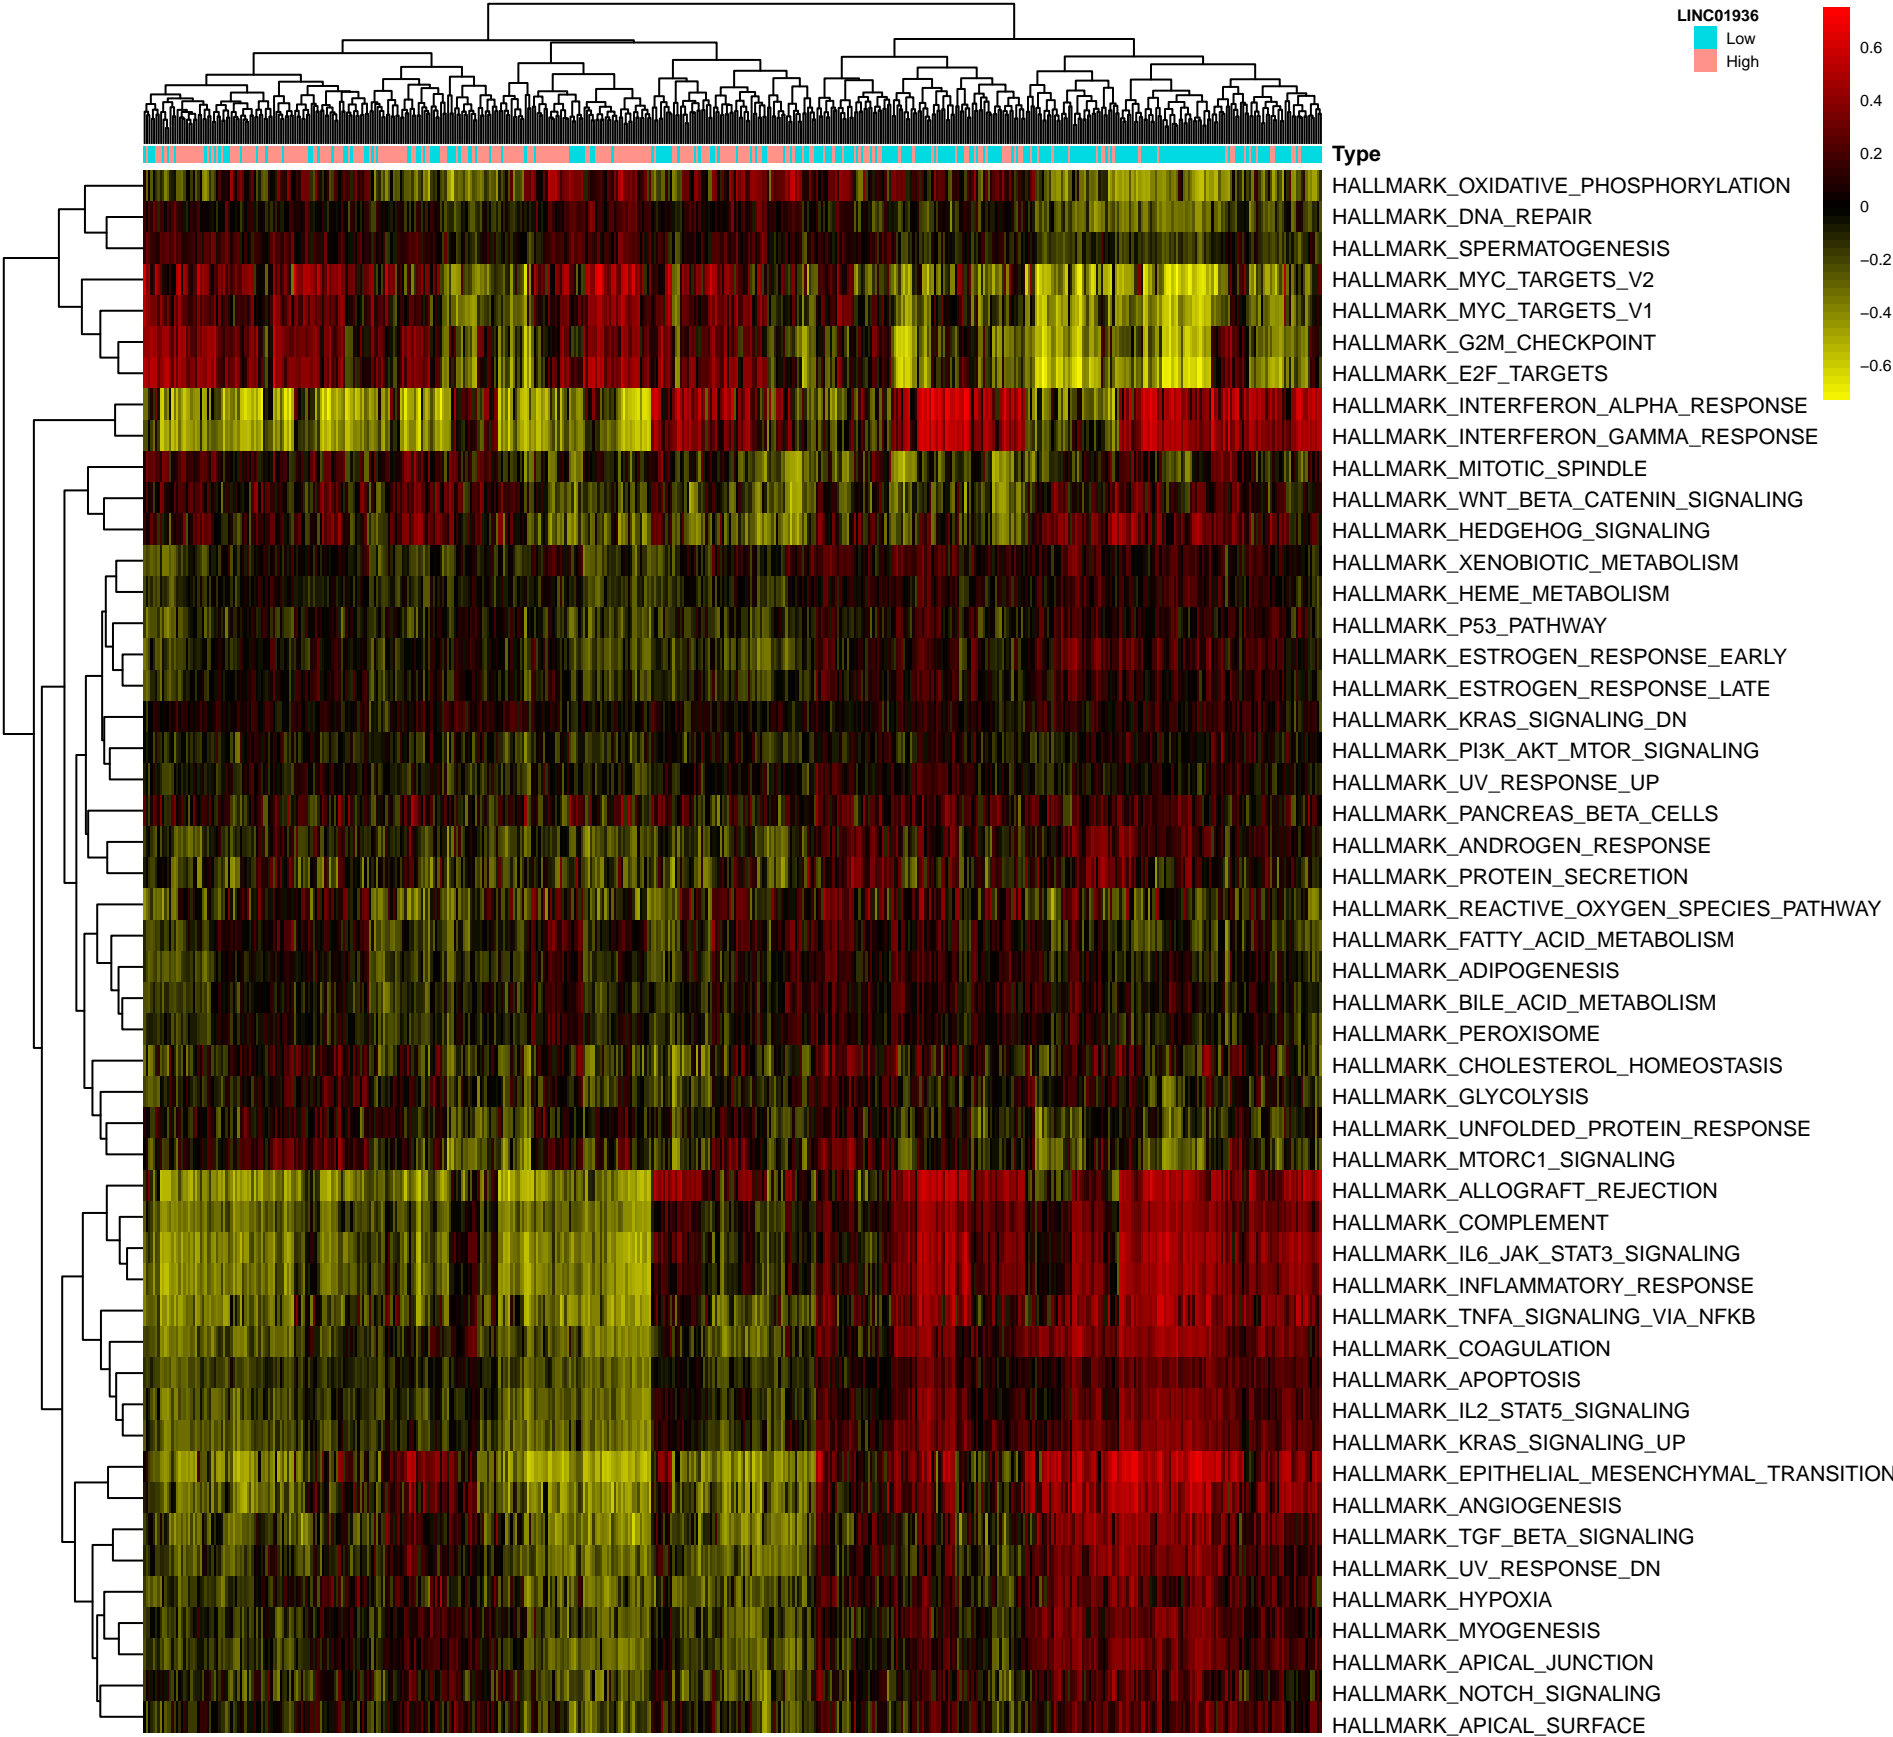

Supplement: S5.zip [file GSVA.pdf › S5. KEGG GO GSVA/GSVA.pdf]

## Pathway Analysis

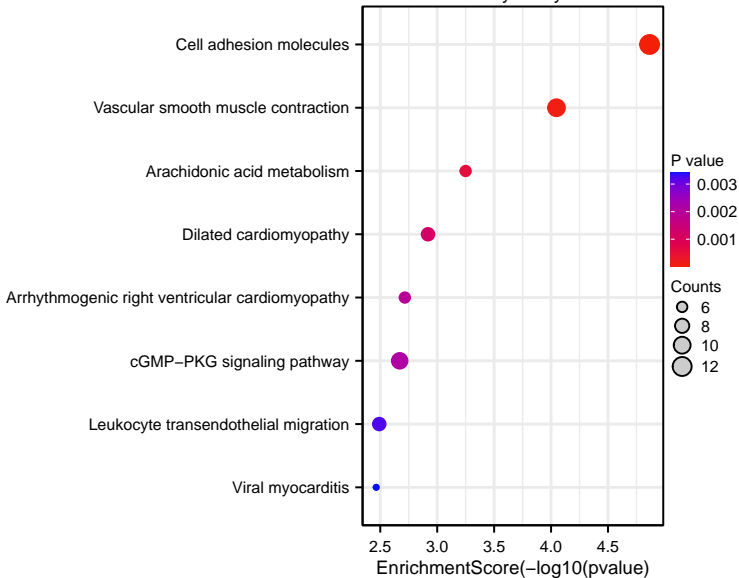

Supplement: S5.zip [file KEGG.pdf › S5. KEGG GO GSVA/KEGG.pdf]

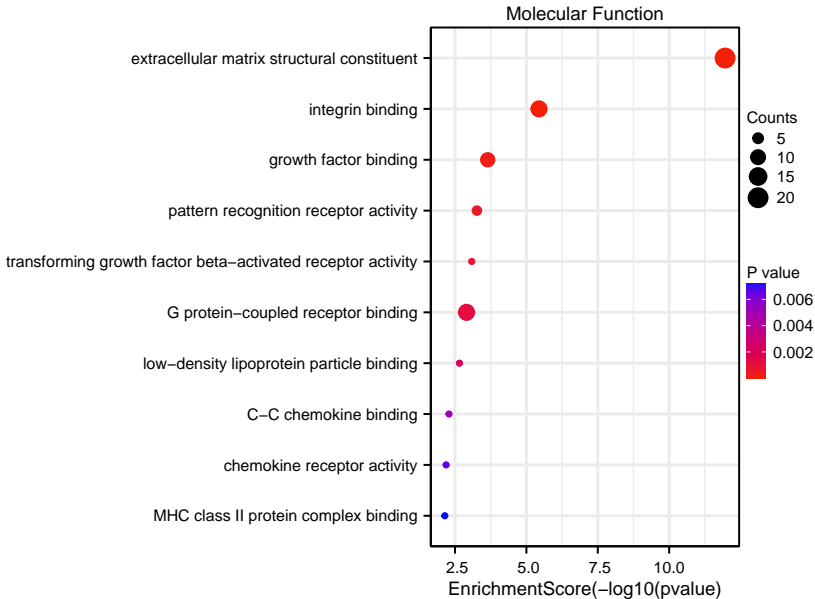

Supplement: S5.zip [file MF.pdf › S5. KEGG GO GSVA/MF.pdf]

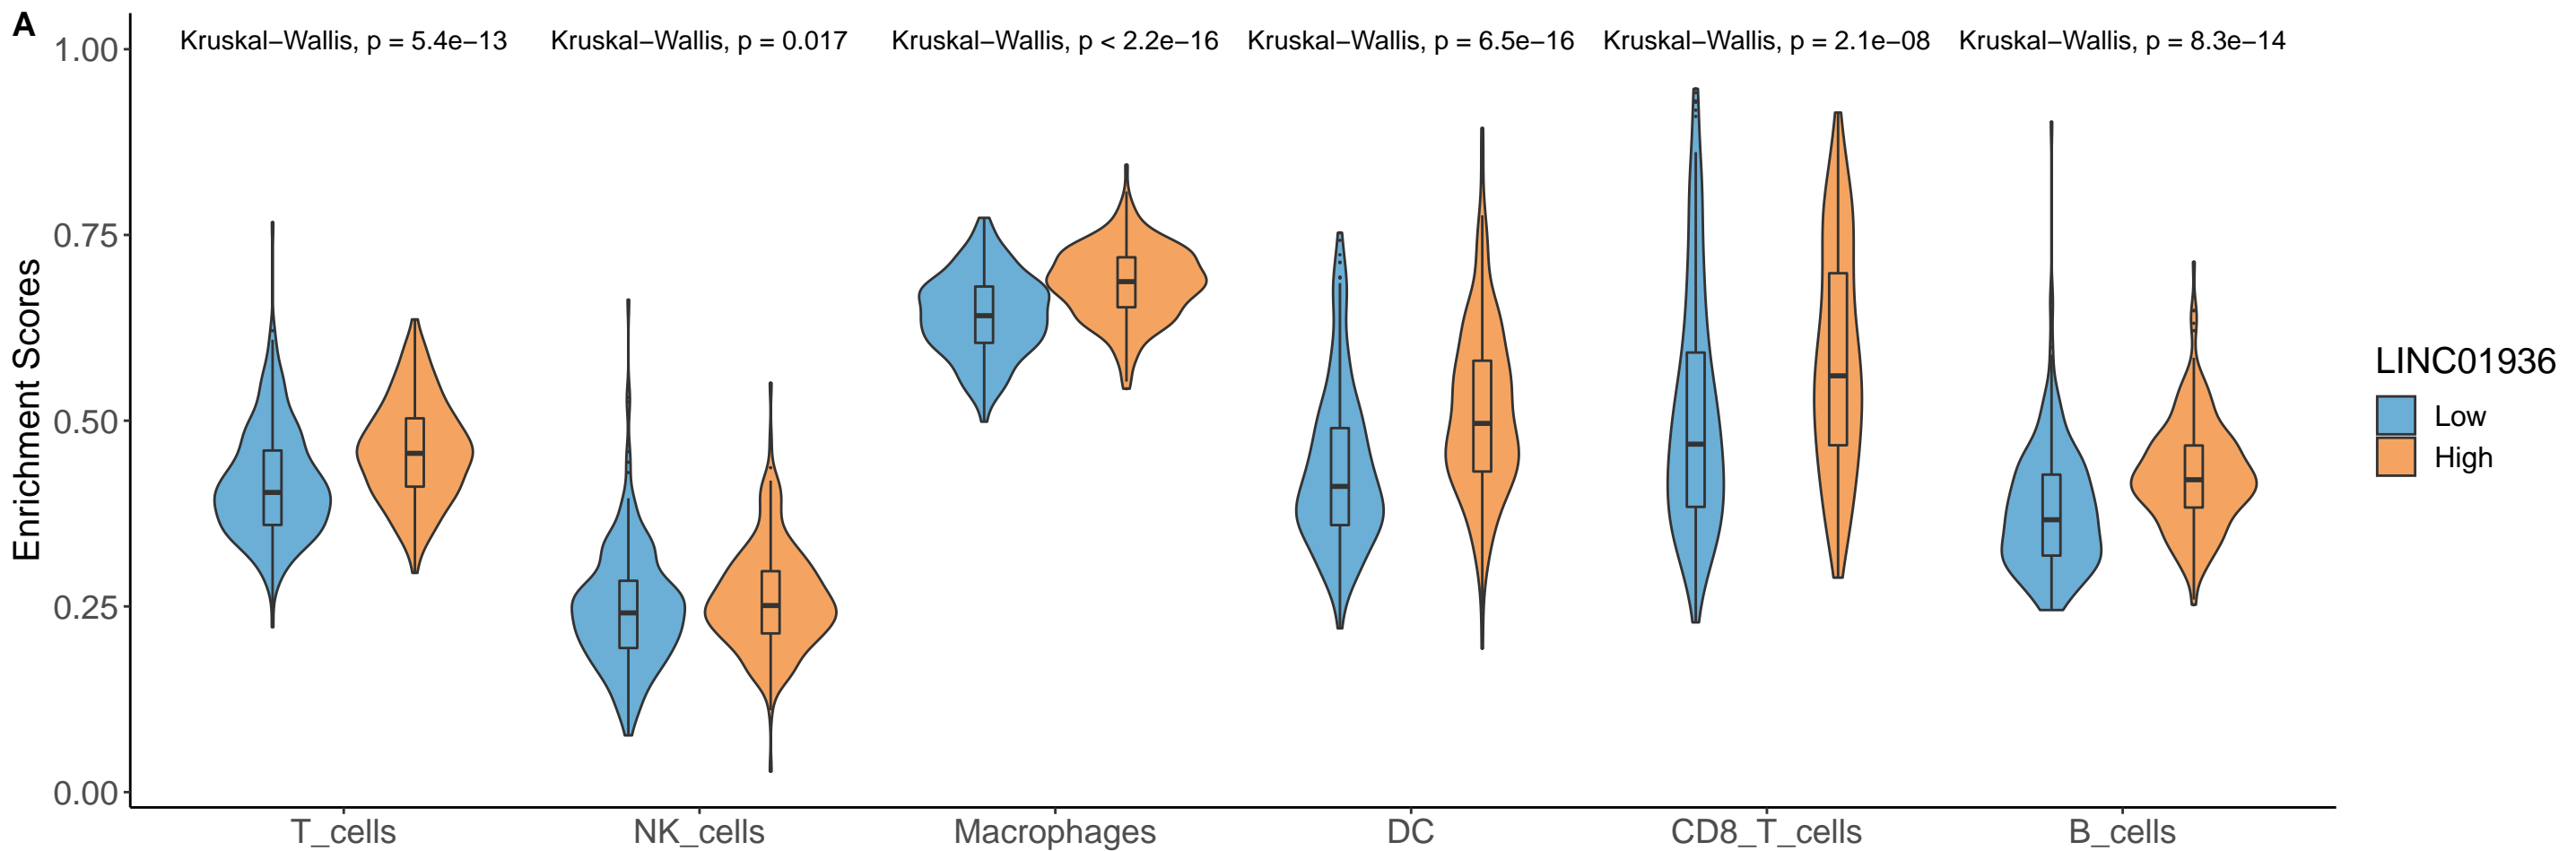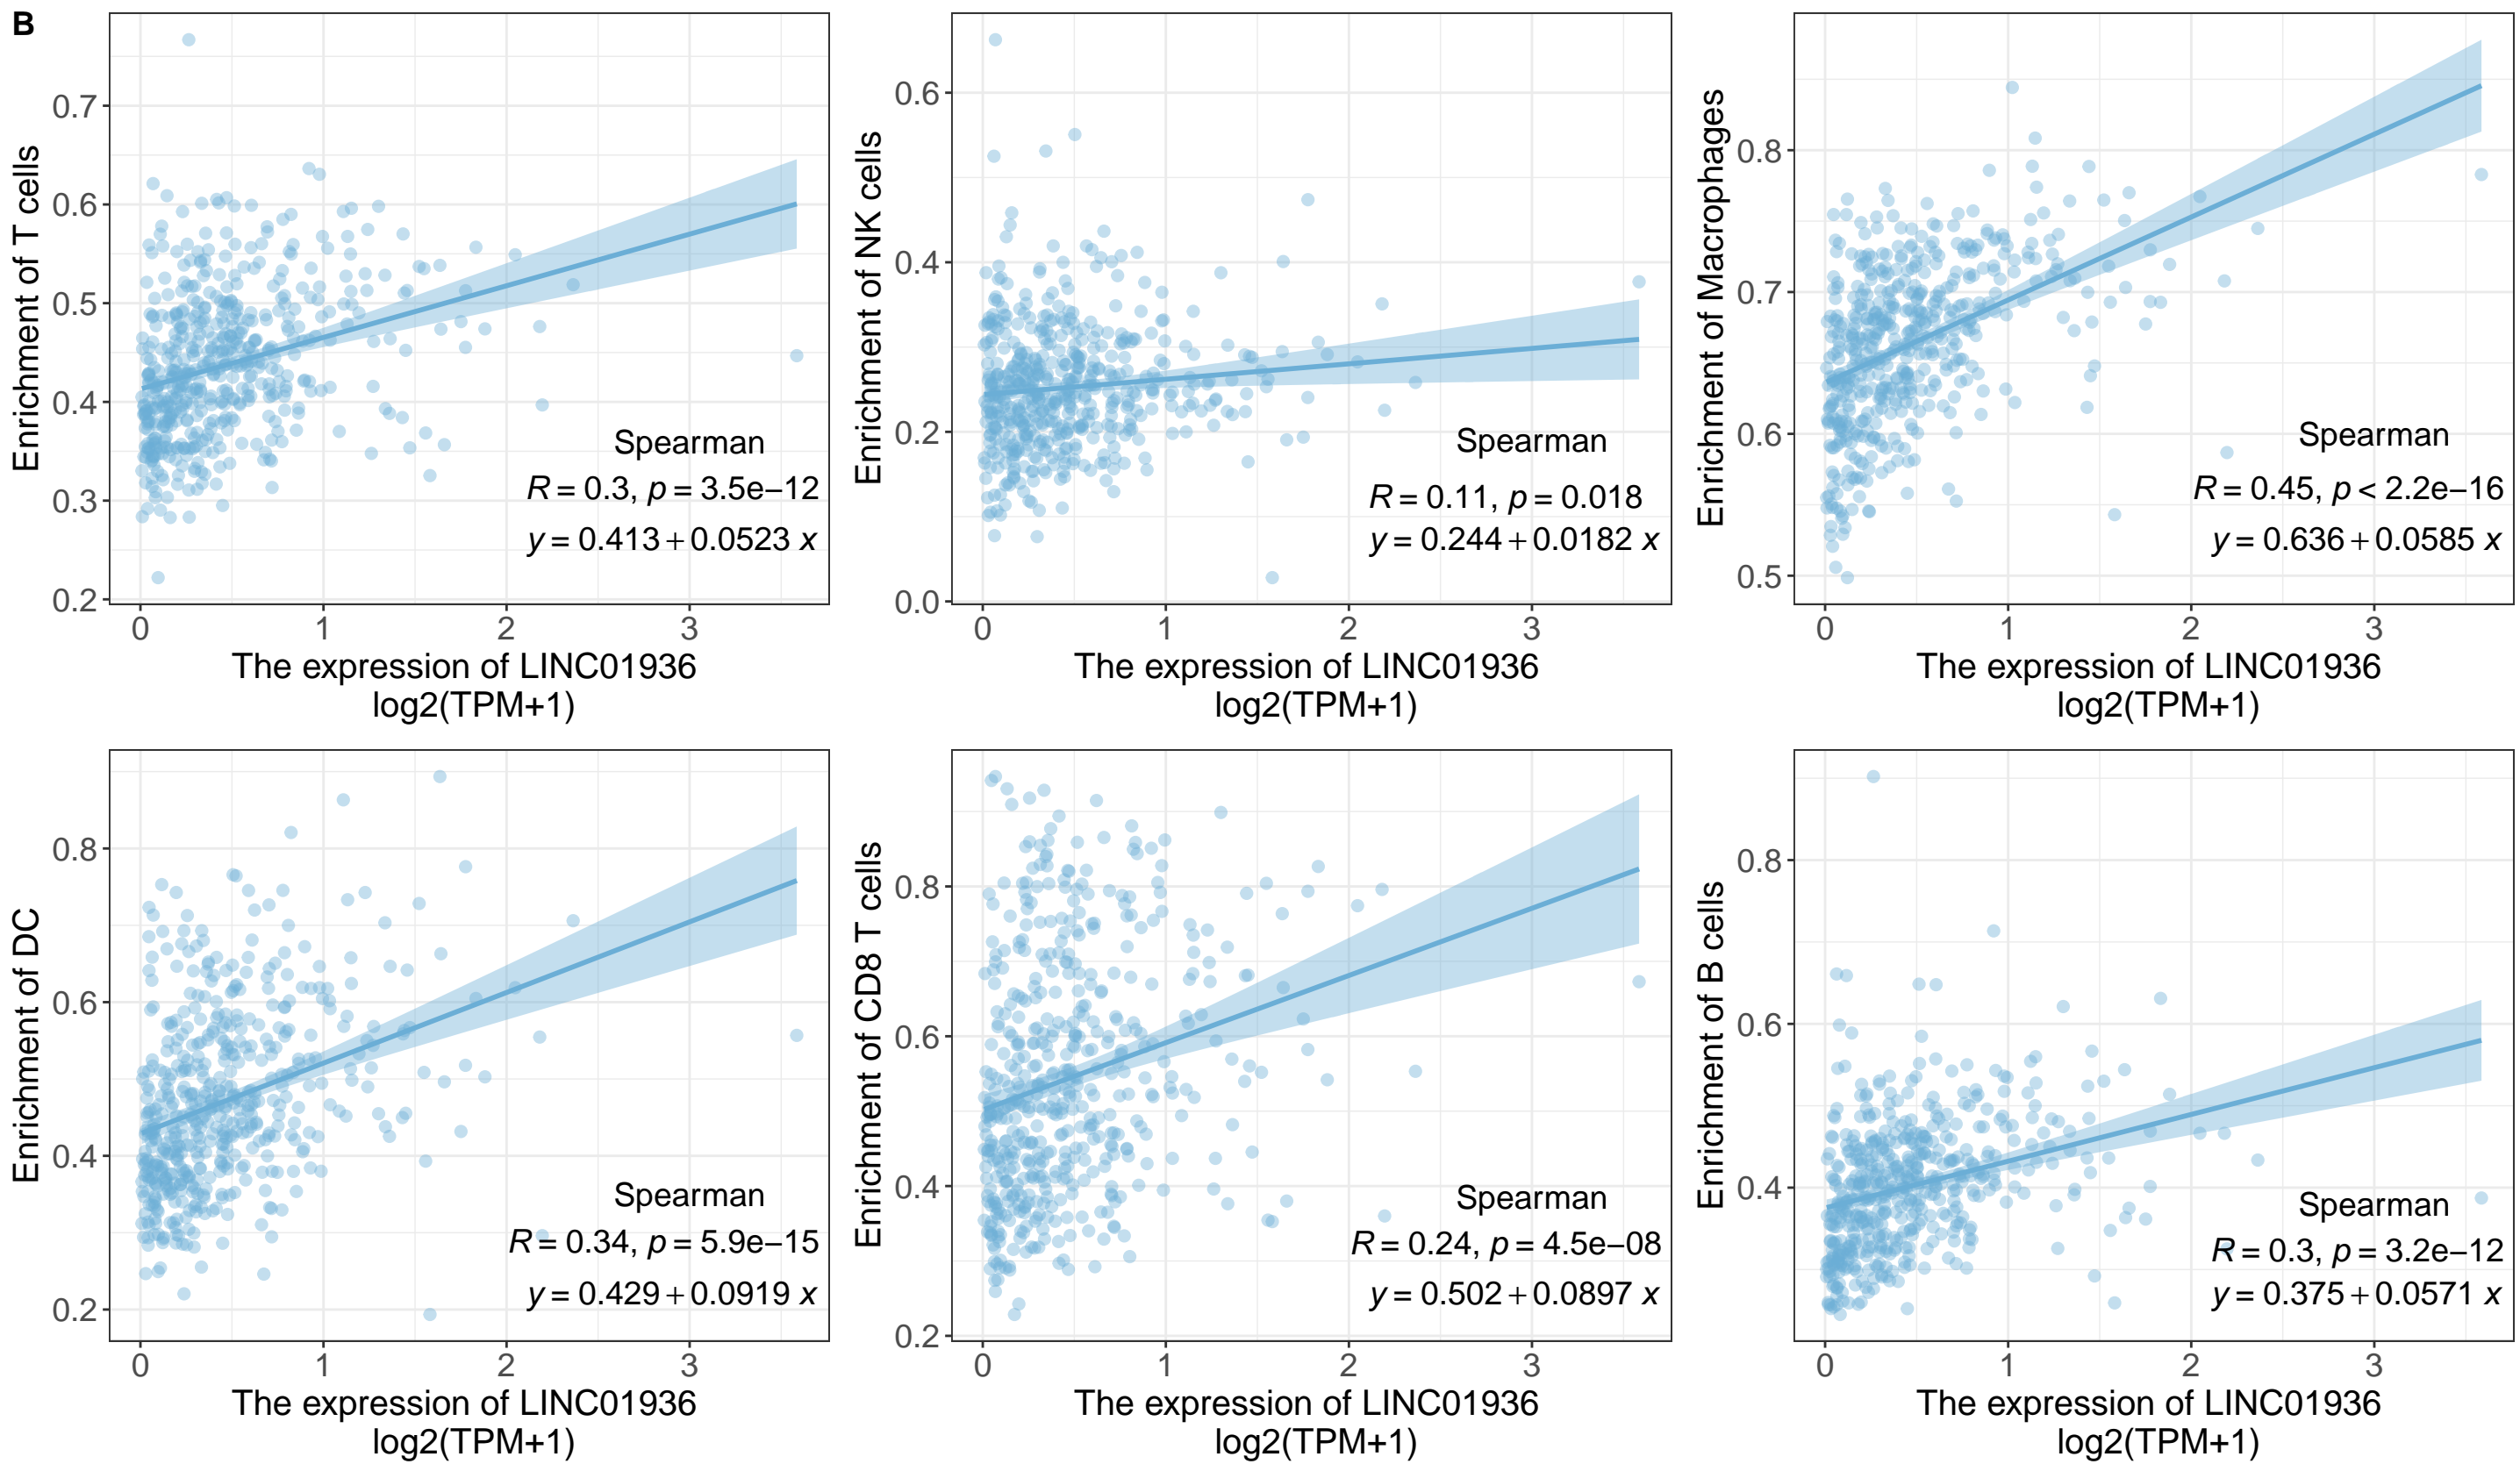

Supplement: S7.zip [file Immune_score_violin _scatter.pdf › S7. Immune infiltration/Immune_score_violin _scatter.pdf]

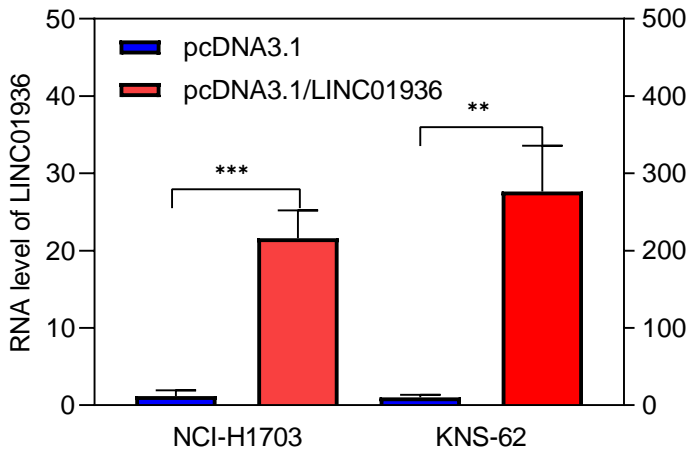

Supplement: S8.zip [file qRT-PCR OV-LINC01936 in H1703 KNS62.pdf › S8. RT-PCR/qRT-PCR OV-LINC01936 in H1703 KNS62.pdf]

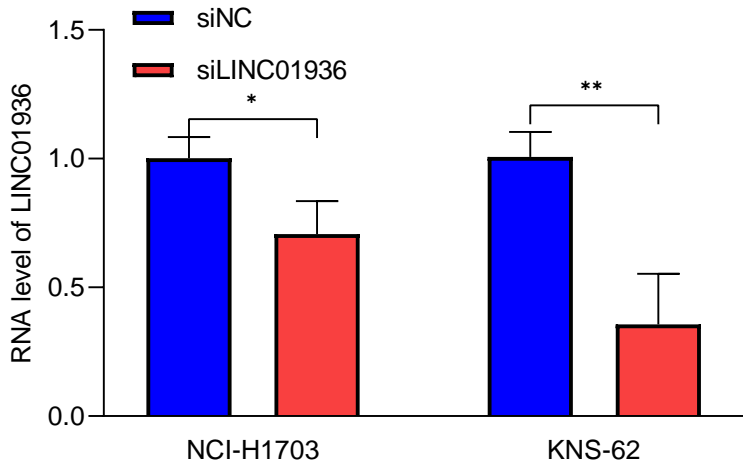

Supplement: S8.zip [file qRT-PCR si-LINC01936 in H1703 KNS62.pdf › S8. RT-PCR/qRT-PCR si-LINC01936 in H1703 KNS62.pdf]
